# Supplementary material
Source: HighWire-hosted journal article supplement (https://www.cmaj.ca/highwire/filestream/78554/field_highwire_adjunct_files/0/201686-res-1-at.pdf)
Supplement: 201686-res-1-at.pdf [file 201686-res-1-at.pdf]

## Appendix 1 (as supplied by the authors)

### Supplemental materials to:

#### Diagnosis-wide analysis of COVID-19 complications: An exposure-crossover study

William Murk, PhD MPH<sup>1,2\*</sup>, Monica Gierada, MPH<sup>2\*</sup>, Michael Fralick, MD PhD SM FRCPC<sup>3\*</sup>, Andrew Weckstein, BA<sup>2</sup>, Reyna Klesh, MS<sup>4</sup>, Jeremy A. Rassen, ScD FISPE<sup>2</sup>

1 Jacobs School of Medicine & Biological Sciences, University at Buffalo, Buffalo, NY.

2 Aetion, Inc., New York, NY.

3 Department of Medicine, University of Toronto, Toronto, ON, Canada.

4 HealthVerity, Inc. Philadelphia, PA.

\* These first authors contributed equally to this article.

#### Table of contents

|                                                                                                                                   |    |
|-----------------------------------------------------------------------------------------------------------------------------------|----|
| Supplemental Methods .....                                                                                                        | 2  |
| eFigure 1. Open and closed claims .....                                                                                           | 5  |
| eFigure 2. Timing of COVID-19 complications relative to the index date .....                                                      | 6  |
| eFigure 3. Study design .....                                                                                                     | 7  |
| eFigure 4. Patient selection .....                                                                                                | 8  |
| eTable 1. Number of unique diagnosis codes in the baseline period (pre-COVID-19) and hazard period (with COVID-19).....           | 9  |
| eTable 2. Candidate COVID-19 complications, by ICD-10 header code (primary analysis) .....                                        | 10 |
| eTable 3. Codes that significantly decreased in odds upon being diagnosed with COVID-19 (primary analysis) .....                  | 13 |
| eTable 4. Candidate COVID-19 complications: codes identified in the primary analysis, examined at the individual code level ..... | 26 |
| eTable 5. Candidate COVID-19 complications, by individual ICD-10 code (secondary analysis) .....                                  | 30 |
| eTable 6. Risk estimates for acute kidney failure, respiratory failure/ARDS, pneumonia, and SIRS/sepsis/septic shock .....        | 31 |
| eTable 7. Risks of candidate COVID-19 complications, by age.....                                                                  | 33 |
| eTable 8. Risks of candidate COVID-19 complications, by sex .....                                                                 | 35 |
| eTable 9. Risks of candidate COVID-19 complications, by hospitalization status.....                                               | 37 |
| eTable 10. Sensitivity analysis (38-day baseline period).....                                                                     | 39 |

## Supplemental Methods

### Dataset description

This study included the medical claims subset of the HealthVerity Marketplace, which captures data concerning diagnoses, dates of service, place of service, revenue codes, and patient demographics. Claims for both inpatient and outpatient services are included. These data originate from a variety of sources in the U.S., including:

- *Practice management systems, or billing systems / revenue cycle management vendors.* These sources measure all activity happening within a covered provider, and have coverage across all payers and pay types, including patients paying with cash. Generally, these sources provide pre-adjudication data, but may also report post-adjudicated data including reimbursed amounts. Similar to electronic health records, plan enrollment data is not captured, but “activity” within the system can be used as a proxy for enrollment. Patients can be lost from the sample if they see providers outside of the covered systems.
- *Clearinghouses/switches.* These capture claims being transmitted between the data provider and the payer for adjudication. They have broad coverage across all payers and pay types, including patients paying with cash. Generally, these sources provide pre-adjudication data, but may also report post-adjudicated data including reimbursed amounts. They may measure all activity within a provider, or less than all, depending on the source and the payer, as many clearinghouses have interchange agreements to route claims. Plan enrollment data is not captured, but “activity” within the system can be used as a proxy for enrollment. Patients can be lost from the sample if they see providers outside of these systems.
- *Payers (i.e., insurance companies).* These sources provide adjudicated claims. Typically, these sources are more heavily weighted towards commercial lines of business. Patients paying with cash are not included. Typically, these sources have more reporting latency as data are released post-adjudication. Data may include enrollment information for the covered population. Generally, they include 100% of reimbursed activity for patients while enrolled. Patients can be lost from the sample if they disenroll or change to plans outside the covered data providers.

These data sources can be categorized depending on whether they provide “open” or “closed” claims.

- *Open claims.* Open claims are sourced from practice management systems, billing systems, and claims clearinghouses/switches. These claims are generally submitted by providers for consideration by payers, and as such represent a “first draft” (and for the vast majority, also the “final draft”) of claims that insurers will pay. A minority of claims can be changed during adjudication if disputed by a payer (e.g., if there are disputes over covered services, or if diagnosis codes are not specified to the correct level of detail, etc.). Open claims are generally available in near real-time (as recently as 1-2 days after the date of service).
- *Closed claims.* Closed claims are those that are accepted by and paid by an insurance company. Because insurers generally pay for all of a patients’ care, or at least track all care, closed claims present a complete view of services. Claims are generally lagged by 2-3 months.

The HealthVerity Marketplace dataset also includes pharmacy benefit claims data for patients included in the medical claims dataset. Demographic information for patients (specifically, year of birth and sex) were drawn from this pharmacy data, because these variables were more complete in the pharmacy data as compared to medical claims for the same patients. No other pharmacy data was used.

In general, open claims are automatically updated on a daily or weekly basis, depending on the specific source, while closed claims are updated on a monthly basis. For the present study, the time period of dates of service covered by the data was November 1, 2019 through May 30, 2020. Data were last extracted on June 16, 2020, meaning that there was a claims lag period (time available to submit a claim after its date of service) of at least 17 days. **eFigure1** shows the distribution of observations (number of rows in the database) on each date of service in 2020 pertaining to open and closed claims for patients included in this study.

A complete claims history for each patient was constructed by linking patient records across all available data sources. This was performed using methodology developed by HealthVerity, Inc. Linkage accuracy was 99.7% (0.3% false positives), and 96% of possible linkages were made (4% false negative). All linkage was performed according to HIPAA regulations.

During data transfer, file integrity was validated by verifying file hashes, patient counts, and observation counts. Accuracy of diagnostic data in the submitted claims information cannot be directly determined, as the underlying ‘ground truth’ of patient health status is not available. However, validity of the aggregate data was assessed by confirming that prevalences of common (e.g. hypertension, diabetes, asthma, COPD, etc.) and uncommon medical conditions were within expected ranges for different demographic groups.

#### *Data missingness*

Key variables from the cut of the HealthVerity database used in this study, as well as their percentage missing, are described below.

| <b>Variable</b>          | <b>Variable description</b> | <b>Dataset</b>  | <b>N. Observations</b> | <b>% Missing</b> |
|--------------------------|-----------------------------|-----------------|------------------------|------------------|
| CLAIM_TYPE               | Claim type                  | Medical claims  | 11,529,256,134         | 4.4%             |
| DIAGNOSIS_CODE           | Diagnosis code              | Medical claims  | 11,529,256,134         | 49.5%            |
| DATE_SERVICE             | Date of service             | Medical claims  | 11,529,256,134         | 0.0%             |
| HVID                     | HealthVerity Patient ID     | Medical claims  | 11,529,256,134         | 0.0%             |
| INST_TYPE_OF_BILL_STD_ID | Bill Type (Standard)        | Medical claims  | 11,529,256,134         | 93.5%            |
| PLACE_OF_SERVICE_STD_ID  | Place of Service (Standard) | Medical claims  | 11,529,256,134         | 78.3%            |
| REVENUE_CODE             | Revenue Code                | Medical claims  | 11,529,256,134         | 93.1%            |
| PATIENT_YEAR_OF_BIRTH    | Year of Birth               | Pharmacy claims | 1,542,496,628          | <0.1%            |
| PATIENT_GENDER           | Gender                      | Pharmacy claims | 1,542,496,628          | 1.5%             |

The denominator (“N. Observations”) for these counts is the total number of rows in the database cut. A single medical claim for a single patient can be represented across multiple rows in the database. For example, if a medical claim has two diagnosis codes listed on it, that will be captured in two rows in the database.

Note that a missing value does *not* necessarily imply that a value should have been present but was unknown. Rather, it could indicate that the variable was not applicable for a given claim line, provider, or facility.

Patients were excluded if they had missing PATIENT\_YEAR\_OF\_BIRTH. No imputation of missing data was performed.

#### *Definition of outpatients, inpatients, and ICU patients*

Outpatients were those who did not have an inpatient claim at any time in the hazard period. Inpatients were those who had any inpatient claim at any time in the hazard period, with or without outpatient activity at other times in the hazard period. ICU patients were those who had any ICU claim in the hazard period, with or without outpatient activity or other inpatient activity at other times in the hazard period. The outpatient and inpatient subgroups were mutually exclusive, while the inpatient subgroup included ICU patients. An ICU claim was any claim with an ICU-related revenue code (0200, 0201, 0202, 0203, 0204, 0206, 0207, 0208, 0209).

#### *Definition of baseline (pre-COVID-19) conditions*

Baseline conditions reported in Table 1 of the main manuscript were defined as the occurrence of a medical claim in the baseline period with at least one of the respective ICD-10 codes listed below.

Acute kidney failure: N17

Asthma: J45

Atrial fibrillation or flutter: I48

Bipolar disorder or depression: F31 - F33

Cerebral infarction: I63

Chronic kidney disease: N18

Chronic liver disease: K72.1, K72.9, K73, B18

Chronic obstructive pulmonary disease: J43, J44

Dementia: F01, F02, F03, G30, G31.0

Diabetes mellitus, type 1: E10

Diabetes mellitus, type 2: E11

Dyslipidemia: E78

Heart failure: I50

Hypertension, essential: I10

Inflammatory bowel disease: K50, K51

Ischemic heart disease: I20 - I25

Malignancy: C00 - C96

Peripheral vascular disease: I70, I73

Psychotic disorders: F20 - F29

Rheumatic disease: M05, M06, M30 - M36

Venous thromboembolism: I26, I82

### eFigure 1. Open and closed claims

This figure shows the distribution of observations (number of rows in the database) on each date of service in 2020 pertaining to open and closed claims for patients included in this study. During the allowed index date range when COVID-19 cases were identified, most patients had open claims, while closed claims were more prevalent prior to this time. 87.7% of patients had their index event identified from an open claim.

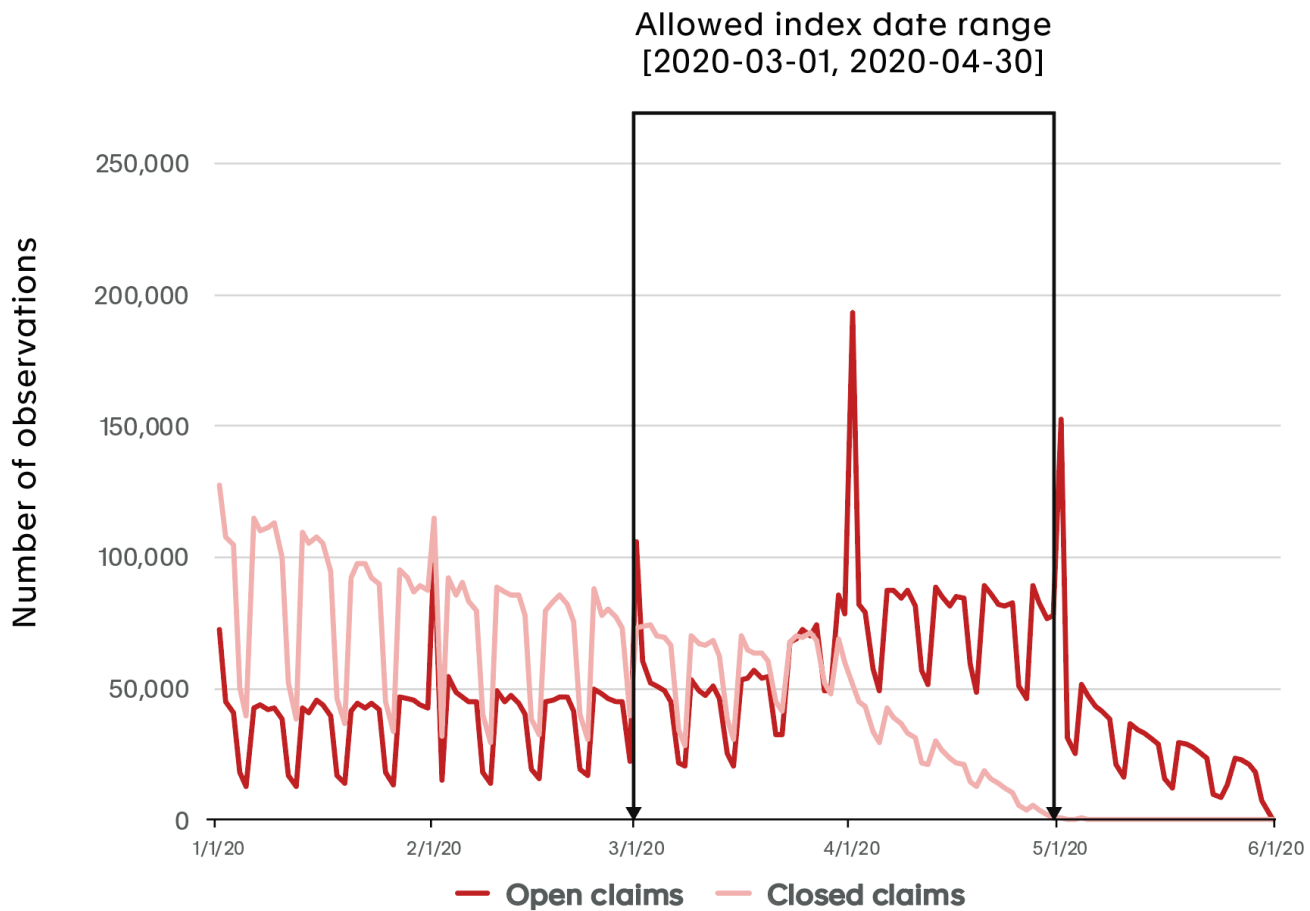

**eFigure 2. Timing of COVID-19 complications relative to the index date**

Using viral pneumonia, cough/dyspnea/fever, acute respiratory failure, and acute kidney failure as representative, expected complications of COVID-19, we sought to assess the time frame (relative to the index date) over which COVID-19 complications tend to occur. Here, we can see that these complications exhibit the sharpest increase in frequency on the index date, but also exhibit a rise in frequency that begins approximately a week prior to index. The index date was the date of first COVID-19 diagnosis.

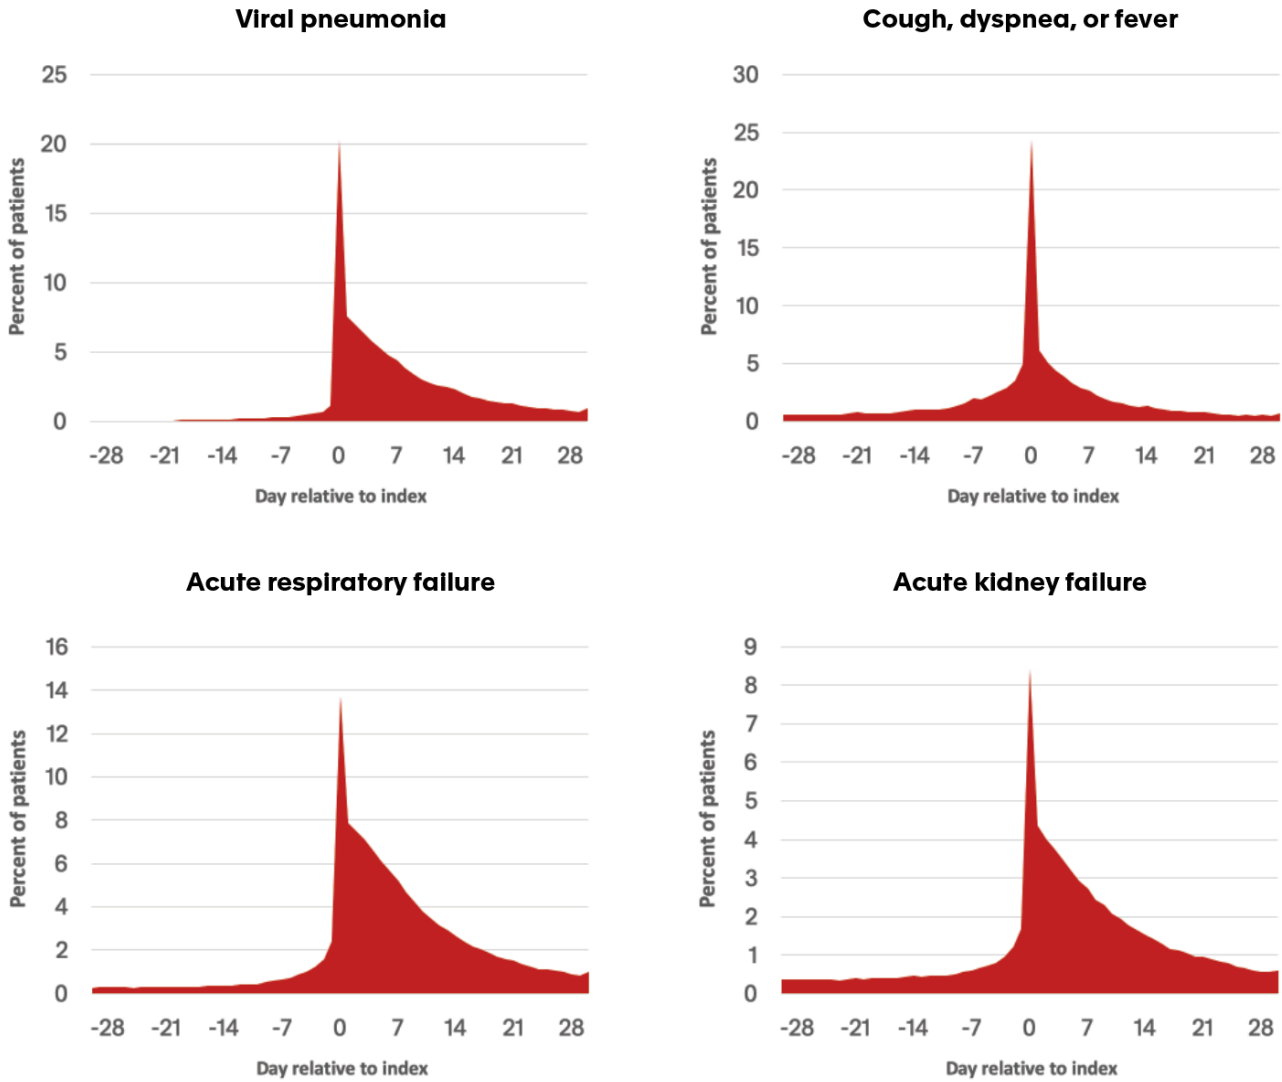

### eFigure 3. Study design

*Study design diagrams:* The boxes below illustrate the durations of the study time windows. The hazard period was defined as day 7 before index to day 30 after index (38 days total, when the index date is included). The primary analysis involved a baseline period that was defined as days 120 to 30 prior to index (90 days total), while the sensitivity analyses involved a baseline period that was defined as days 68 to 30 prior to index (38 days total, identical in duration to the hazard period).

The purpose of the baseline period is to detect conditions already present in the patient just before SARS-CoV-2 infection, as such conditions cannot be attributed to SARS-CoV-2. Longer baseline periods are more sensitive in detecting chronic conditions. For example, for a patient who infrequently seeks care for hypertension, their last recorded claim related to hypertension may have occurred months in the past and thus may only be detected with longer baseline periods. Since the disease is a chronic condition, it would nonetheless likely still be present by the time of COVID-19 onset and therefore it would appropriately qualify as a pre-existing condition that cannot be attributable to COVID-19. However, longer baseline periods may also be more likely to detect acute conditions that occurred in the past and have since resolved. Since an acute condition that resolved is no longer actually present in a patient just before SARS-CoV-2 infection, it should not qualify as a pre-existing condition. For example, a patient who had a single claim for respiratory infection that occurred 12 months ago likely had the infection eventually resolve. For this patient, the infection is probably no longer present just prior to COVID-19 infection. Thus, longer baseline periods may over-estimate the prevalence of acute conditions present in a patient just prior to SARS-CoV-2 infection, since there is more time to accrue old events that have actually resolved. Correspondingly, this would under-estimate the odds ratio of association with COVID-19. For this reason, we conducted a sensitivity analysis to evaluate the effect of decreasing the length of the baseline period.

*Statistical calculations:* For every ICD-10 diagnosis code, a two-by-two table can be constructed where the table cells A, B, C, and D are defined as shown below. Since observations were matched, the odds ratio was defined as C/B. Risk was calculated only among patients who were at-risk of newly onset disease (i.e., only among patients who did not have the code present in the baseline period), and therefore was defined as C/(C+D). Baseline prevalence (as described for selected conditions in Table 1 and Figure 2) was calculated as (A+B)/(A+B+C+D).

#### Study design diagrams

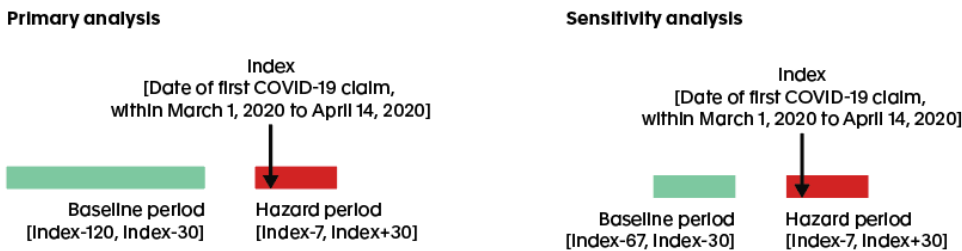

#### Statistical calculations

##### Odds ratio and risk calculations

|                 |              | Hazard period |             |
|-----------------|--------------|---------------|-------------|
|                 |              | Code present  | Code absent |
| Baseline period | Code present | A             | B           |
|                 | Code absent  | C             | D           |

**A** = Number of patients with the code in the baseline and hazard period

**B** = Number of patients with the code in the baseline but not hazard period

**C** = Number of patients with the code in the hazard but not baseline period

**D** = Number of patients without the code in either the baseline or hazard periods

**Odds ratio** = C/B

**Risk** = C / (C + D)

**Prevalence** = (A + B) / (A + B + C + D)

**eFigure 4. Patient selection**

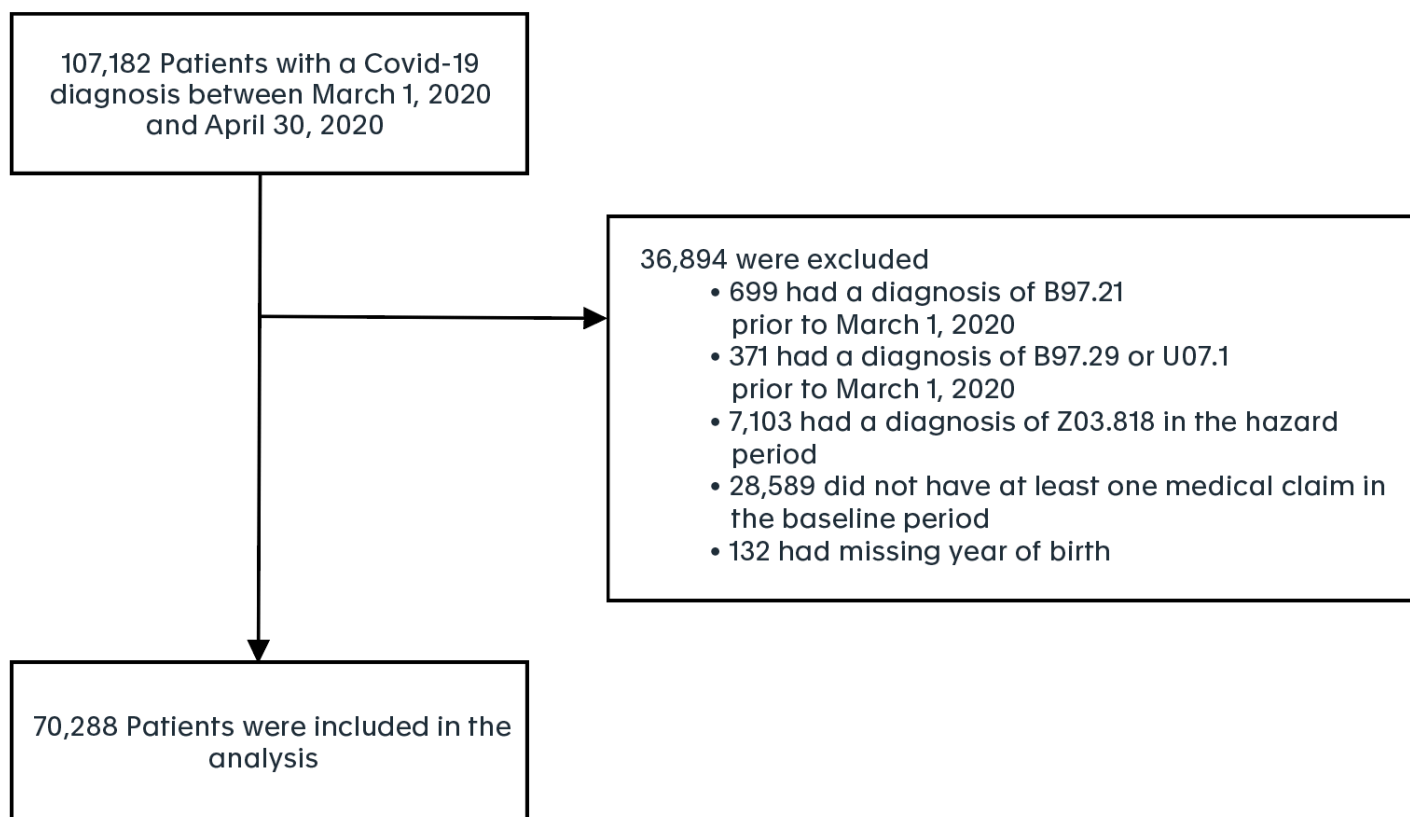

*Descriptions of ICD-10 codes mentioned above:*

**B97.21:** SARS-associated coronavirus

**B97.29:** Other coronavirus as the cause of disease classified elsewhere

**U07.1:** COVID-19, virus identified

**Z03.818:** Encounter for observation for suspected exposure to other biological agents ruled out.  
Note: this code is used when exposure to COVID-10 was suspected but ruled out after evaluation (<https://www.cdc.gov/nchs/data/icd/COVID-19-guidelines-final.pdf>).



**eTable 1. Number of unique diagnosis codes in the baseline period (pre-COVID-19) and hazard period (with COVID-19)**

| <b>Subgroup</b> | <b>Number of unique diagnosis codes – median [IQR]</b> |                      |
|-----------------|--------------------------------------------------------|----------------------|
|                 | <b>Baseline period</b>                                 | <b>Hazard period</b> |
| All patients    | 9 [4, 18]                                              | 9 [4, 17]            |
| Outpatients     | 7 [3, 14]                                              | 5 [3, 8]             |
| Inpatients      | 11 [5, 22]                                             | 15 [9, 23]           |
| ICU patients    | 13 [6, 27]                                             | 29 [21, 40]          |
| Age < 18        | 5 [3, 10]                                              | 5 [3, 9]             |
| Age 18 to < 65  | 7 [3, 15]                                              | 7 [3, 13]            |
| Age >= 65       | 11 [5, 21]                                             | 12 [6, 20]           |

**eTable 2. Candidate COVID-19 complications, by ICD-10 header code (primary analysis)**

This table shows findings for all header-level codes that increased in odds with COVID-19, with  $P < 0.05$ . White shading: candidate COVID-19 complications (i.e., codes that increased in odds with  $P < \text{Bonferroni-corrected threshold}$ ); these codes correspond to Figures 2 and 3 in the main manuscript. Gray shading: nominally significant codes ( $P < 0.05$  but not  $< \text{Bonferroni-corrected threshold}$ ). OR (Est.): odds ratio for association with COVID-19, point estimate. OR (LI) and OR (UI): 95% lower and upper confidence intervals for the odds ratio. OR, Risk, A, B, C, and D are defined in eFigure 3. P-value: p-value from McNemar test (null hypothesis: OR = 1). The Bonferroni-corrected significance threshold for this analysis was  $0.05/1,724 = 2.9\text{E-}05$ .

| eTable 2 / Code                                         | OR (Est.) | OR (LI) | OR (UI) | Risk  | A     | B     | C      | D      | P-value   |
|---------------------------------------------------------|-----------|---------|---------|-------|-------|-------|--------|--------|-----------|
| A41 - Other sepsis                                      | 4.23      | 4.01    | 4.46    | 10.4% | 727   | 1,676 | 7,086  | 60,799 | 0.00E+00  |
| B33 - Other viral diseases, NEC                         | 10.88     | 6.55    | 18.05   | 0.2%  | 3     | 16    | 174    | 70,095 | 4.69E-30  |
| B34 - Viral infection of unspecified site               | 8.47      | 7.86    | 9.12    | 9.5%  | 150   | 781   | 6,612  | 62,745 | 0.00E+00  |
| B87 - Myiasis                                           | 14.00     | 2.13    | 591.97  | 0.0%  | 0     | 1     | 14     | 70,273 | 9.77E-04  |
| B96 - Other bacterial agents, CE                        | 1.25      | 1.16    | 1.35    | 2.2%  | 152   | 1,190 | 1,489  | 67,457 | 8.54E-09  |
| B99 - Other infectious diseases                         | 2.94      | 2.42    | 3.57    | 0.6%  | 11    | 135   | 397    | 69,745 | 1.10E-29  |
| D61 - Other aplastic anemias / bone marrow              | 1.50      | 1.28    | 1.75    | 0.5%  | 115   | 254   | 380    | 69,539 | 6.89E-07  |
| D65 - Disseminated intravascular coagulation            | 11.83     | 5.26    | 26.62   | 0.1%  | 0     | 6     | 71     | 70,211 | 3.02E-13  |
| D69 - Purpura/other hemorrhagic conditions              | 1.52      | 1.40    | 1.65    | 2.0%  | 331   | 896   | 1,362  | 67,699 | 1.30E-22  |
| D72 - Other disorders of white blood cells              | 1.67      | 1.57    | 1.78    | 4.0%  | 303   | 1,618 | 2,704  | 65,663 | 3.44E-61  |
| D76 - Other specified diseases with lymphoreticular ... | 5.00      | 1.07    | 46.93   | 0.0%  | 0     | 2     | 10     | 70,276 | 3.86E-02  |
| E43 - Unspecified severe malnutrition                   | 2.11      | 1.86    | 2.38    | 1.1%  | 188   | 374   | 788    | 68,938 | 8.73E-34  |
| E44 - Malnutrition (moderate & mild)                    | 1.20      | 1.06    | 1.36    | 0.8%  | 155   | 476   | 572    | 69,085 | 3.34E-03  |
| E46 - Unspecified malnutrition                          | 1.32      | 1.18    | 1.48    | 1.0%  | 219   | 523   | 691    | 68,855 | 1.64E-06  |
| G72 - Other & unspecified myopathies                    | 2.70      | 2.17    | 3.36    | 0.4%  | 29    | 109   | 294    | 69,856 | 4.92E-20  |
| G92 - Toxic encephalopathy                              | 1.73      | 1.51    | 1.98    | 0.8%  | 42    | 338   | 585    | 69,323 | 5.62E-16  |
| G93 - Other disorders of brain                          | 1.93      | 1.82    | 2.04    | 4.9%  | 787   | 1,725 | 3,328  | 64,448 | 1.82E-112 |
| I21 - Acute myocardial infarction                       | 1.59      | 1.45    | 1.74    | 1.8%  | 249   | 773   | 1,228  | 68,038 | 3.34E-24  |
| I24 - Other acute ischemic heart diseases               | 1.79      | 1.53    | 2.09    | 0.6%  | 44    | 241   | 431    | 69,572 | 3.08E-13  |
| I26 - Pulmonary embolism                                | 1.66      | 1.47    | 1.87    | 1.0%  | 195   | 427   | 709    | 68,957 | 7.61E-17  |
| I40 - Acute myocarditis                                 | 8.17      | 3.58    | 18.62   | 0.1%  | 0     | 6     | 49     | 70,233 | 1.49E-08  |
| I45 - Other conduction disorders                        | 1.39      | 1.26    | 1.54    | 1.3%  | 151   | 640   | 891    | 68,606 | 1.67E-10  |
| I46 - Cardiac arrest                                    | 10.43     | 8.23    | 13.21   | 1.1%  | 28    | 75    | 782    | 69,403 | 1.68E-128 |
| I48 - Atrial fibrillation & flutter                     | 1.19      | 1.13    | 1.26    | 4.6%  | 3,178 | 2,489 | 2,973  | 61,648 | 6.34E-11  |
| I95 - Hypotension                                       | 1.80      | 1.68    | 1.92    | 3.8%  | 466   | 1,432 | 2,572  | 65,818 | 1.94E-72  |
| J06 - Acute upper respiratory infections                | 1.29      | 1.23    | 1.36    | 5.9%  | 440   | 3,069 | 3,969  | 62,810 | 8.56E-27  |
| J12 - Viral pneumonia, NEC                              | 177.63    | 147.19  | 214.37  | 27.6% | 75    | 109   | 19,362 | 50,742 | 0.00E+00  |
| J13 - Pneumonia due to Streptococcus pneumoniae         | 2.15      | 1.36    | 3.42    | 0.1%  | 2     | 26    | 56     | 70,204 | 1.36E-03  |
| J15 - Bacterial pneumonia, NEC                          | 3.46      | 3.09    | 3.87    | 2.0%  | 77    | 398   | 1,376  | 68,437 | 4.97E-119 |
| J16 - Pneumonia due to other organisms                  | 6.26      | 4.65    | 8.43    | 0.4%  | 10    | 50    | 313    | 69,915 | 4.99E-43  |
| J17 - Pneumonia in diseases, CE                         | 3.83      | 2.05    | 7.16    | 0.1%  | 5     | 12    | 46     | 70,225 | 1.47E-05  |
| J18 - Pneumonia, unspecified organism                   | 5.68      | 5.44    | 5.94    | 20.4% | 1,370 | 2,391 | 13,591 | 52,936 | 0.00E+00  |
| J22 - Unspecified acute lower resp. infection           | 28.77     | 23.75   | 34.84   | 4.4%  | 9     | 108   | 3,107  | 67,064 | 0.00E+00  |
| J40 - Bronchitis, not specified acute/chronic           | 1.16      | 1.06    | 1.27    | 1.4%  | 57    | 849   | 983    | 68,399 | 1.89E-03  |
| J69 - Pneumonitis due to solids & liquids               | 1.17      | 1.03    | 1.32    | 0.8%  | 124   | 465   | 544    | 69,155 | 1.41E-02  |
| J80 - Acute respiratory distress syndrome               | 41.60     | 33.00   | 52.45   | 4.3%  | 20    | 73    | 3,037  | 67,158 | 0.00E+00  |
| J81 - Pulmonary edema                                   | 1.16      | 1.05    | 1.28    | 1.2%  | 138   | 723   | 839    | 68,588 | 3.62E-03  |
| J82 - Pulmonary eosinophilia                            | 4.20      | 1.64    | 10.75   | 0.0%  | 6     | 5     | 21     | 70,256 | 3.26E-03  |
| J84 - Other interstitial pulmonary diseases             | 1.36      | 1.20    | 1.55    | 0.8%  | 162   | 399   | 544    | 69,183 | 2.74E-06  |
| J90 - Pleural effusion, NEC                             | 1.56      | 1.45    | 1.68    | 2.8%  | 425   | 1,237 | 1,932  | 66,694 | 6.39E-35  |
| J93 - Pneumothorax & air leak                           | 3.38      | 2.68    | 4.26    | 0.4%  | 9     | 92    | 311    | 69,876 | 1.80E-27  |
| J95 - Procedural complications of resp. system          | 1.72      | 1.39    | 2.12    | 0.3%  | 20    | 136   | 234    | 69,898 | 4.59E-07  |

| eTable 2 / Code                                       | OR (Est.) | OR (LI) | OR (UI) | Risk  | A     | B     | C      | D      | P-value   |
|-------------------------------------------------------|-----------|---------|---------|-------|-------|-------|--------|--------|-----------|
| J96 - Respiratory failure, NEC                        | 11.36     | 10.74   | 12.02   | 22.6% | 1,921 | 1,332 | 15,133 | 51,902 | 0.00E+00  |
| J98 - Other respiratory disorders                     | 3.43      | 3.27    | 3.60    | 10.6% | 597   | 2,091 | 7,178  | 60,422 | 0.00E+00  |
| J99 - Respiratory disorders in diseases, CE           | 4.13      | 1.94    | 8.77    | 0.0%  | 2     | 8     | 33     | 70,245 | 1.78E-04  |
| K72 - Hepatic failure, NEC                            | 1.48      | 1.21    | 1.81    | 0.3%  | 69    | 162   | 240    | 69,817 | 1.23E-04  |
| L89 - Pressure ulcer                                  | 1.14      | 1.05    | 1.23    | 2.0%  | 851   | 1,181 | 1,345  | 66,911 | 1.18E-03  |
| N07 - Hereditary nephropathy                          | Inf       |         |         | 0.0%  | 0     | 0     | 10     | 70,278 | 1.95E-03  |
| N17 - Acute kidney failure                            | 3.50      | 3.34    | 3.66    | 11.8% | 1,558 | 2,240 | 7,833  | 58,657 | 0.00E+00  |
| O07 - Failed attempted termination of pregnancy       | 8.00      | 1.88    | 71.72   | 0.0%  | 0     | 2     | 16     | 70,270 | 1.31E-03  |
| O41 - Other disorders of amniotic fluid / membranes   | 2.92      | 1.53    | 5.56    | 0.0%  | 1     | 12    | 35     | 70,240 | 1.33E-03  |
| O48 - Late pregnancy                                  | 4.75      | 2.25    | 10.01   | 0.1%  | 0     | 8     | 38     | 70,242 | 1.90E-05  |
| O62 - Abnormalities of forces of labor                | 2.69      | 1.44    | 5.04    | 0.0%  | 0     | 13    | 35     | 70,240 | 2.44E-03  |
| O66 - Other obstructed labor                          | 6.00      | 1.34    | 55.20   | 0.0%  | 0     | 2     | 12     | 70,274 | 1.29E-02  |
| O69 - Labor and delivery complicated by umbilical ... | 2.83      | 1.48    | 5.41    | 0.0%  | 1     | 12    | 34     | 70,241 | 1.96E-03  |
| O70 - Perineal laceration during delivery             | 3.71      | 2.08    | 6.65    | 0.1%  | 0     | 14    | 52     | 70,222 | 5.25E-06  |
| O72 - Postpartum hemorrhage                           | 4.67      | 1.30    | 25.33   | 0.0%  | 0     | 3     | 14     | 70,271 | 1.27E-02  |
| O75 - Other complications of labor and delivery       | 3.00      | 1.14    | 9.23    | 0.0%  | 0     | 6     | 18     | 70,264 | 2.27E-02  |
| O76 - Abnormality in fetal heart rate and rhythm ...  | 2.95      | 1.76    | 4.93    | 0.1%  | 2     | 19    | 56     | 70,211 | 3.23E-05  |
| O77 - Other fetal stress complicating labor ...       | 3.57      | 1.58    | 8.07    | 0.0%  | 0     | 7     | 25     | 70,256 | 2.65E-03  |
| O80 - Encounter for full-term uncomplicated delivery  | 1.86      | 1.25    | 2.77    | 0.1%  | 0     | 37    | 69     | 70,182 | 2.60E-03  |
| O82 - Encounter for cesarean delivery without ...     | 5.00      | 2.14    | 11.71   | 0.0%  | 0     | 6     | 30     | 70,252 | 1.26E-04  |
| O86 - Other puerperal infections                      | 5.75      | 2.08    | 15.90   | 0.0%  | 0     | 4     | 23     | 70,261 | 5.32E-04  |
| O98 - Maternal infectious diseases                    | 9.84      | 6.86    | 14.13   | 0.4%  | 18    | 32    | 315    | 69,923 | 9.02E-02  |
| R00 - Abnormalities of heart beat                     | 1.21      | 1.15    | 1.27    | 5.4%  | 623   | 2,979 | 3,596  | 63,090 | 3.03E-14  |
| R05 - Cough                                           | 2.79      | 2.70    | 2.88    | 22.0% | 2,350 | 4,965 | 13,838 | 49,135 | 0.00E+00  |
| R06 - Abnormalities of breathing                      | 3.42      | 3.31    | 3.53    | 26.2% | 3,607 | 4,741 | 16,202 | 45,738 | 0.00E+00  |
| R09 - Other s/s circulatory/respiratory system        | 3.10      | 2.97    | 3.23    | 14.0% | 1,071 | 3,001 | 9,296  | 56,920 | 0.00E+00  |
| R19 - Other s/s digestive system & abdomen            | 1.26      | 1.19    | 1.33    | 4.4%  | 368   | 2,361 | 2,970  | 64,589 | 8.28E-17  |
| R34 - Anuria & oliguria                               | 3.81      | 2.77    | 5.24    | 0.3%  | 3     | 47    | 179    | 70,059 | 2.93E-18  |
| R40 - Somnolence, stupor & coma                       | 1.37      | 1.26    | 1.48    | 1.9%  | 142   | 977   | 1,334  | 67,835 | 1.31E-13  |
| R41 - Other s/s involving cognitive functions         | 1.21      | 1.16    | 1.26    | 7.3%  | 1,987 | 3,918 | 4,729  | 59,654 | 3.02E-18  |
| R43 - Disturbances of smell & taste                   | 14.62     | 10.06   | 21.25   | 0.6%  | 2     | 29    | 424    | 69,833 | 1.66E-76  |
| R50 - Fever of other & unknown origin                 | 6.52      | 6.24    | 6.82    | 22.2% | 1,066 | 2,274 | 14,832 | 52,116 | 0.00E+00  |
| R53 - Malaise & fatigue                               | 1.21      | 1.17    | 1.25    | 12.7% | 2,800 | 6,424 | 7,781  | 53,283 | 5.43E-30  |
| R57 - Shock, NEC                                      | 4.76      | 4.09    | 5.54    | 1.4%  | 20    | 201   | 956    | 69,111 | 7.17E-109 |
| R62 - Lack of expected normal development             | 1.44      | 1.29    | 1.60    | 1.1%  | 319   | 547   | 785    | 68,637 | 8.37E-11  |
| R65 - S/s of systemic inflammation/infection          | 4.83      | 4.45    | 5.23    | 4.9%  | 173   | 705   | 3,403  | 66,007 | 0.00E+00  |
| R68 - Other general s/s                               | 2.00      | 1.89    | 2.11    | 6.0%  | 616   | 2,024 | 4,042  | 63,606 | 7.14E-148 |
| R74 - Abnormal serum enzyme levels                    | 1.79      | 1.65    | 1.94    | 2.3%  | 122   | 910   | 1,627  | 67,629 | 7.37E-46  |
| R78 - Findings of drugs & other substances            | 1.41      | 1.27    | 1.56    | 1.2%  | 120   | 599   | 842    | 68,727 | 1.83E-10  |
| R79 - Other abnormal findings of blood                | 1.15      | 1.09    | 1.21    | 4.2%  | 405   | 2,439 | 2,799  | 64,645 | 7.04E-07  |
| R91 - Abnormal findings on imaging of lung            | 3.70      | 3.53    | 3.87    | 12.8% | 1,001 | 2,315 | 8,560  | 58,412 | 0.00E+00  |
| R94 - Abnormal results of function studies            | 1.06      | 1.01    | 1.11    | 4.5%  | 431   | 2,862 | 3,028  | 63,967 | 3.16E-02  |
| T37 - Poisoning by ... anti-infectives ...            | 2.73      | 1.38    | 5.37    | 0.0%  | 0     | 11    | 30     | 70,247 | 4.94E-03  |
| T38 - Adverse effects hormones, NEC                   | 1.66      | 1.35    | 2.04    | 0.3%  | 14    | 144   | 239    | 69,891 | 1.56E-06  |
| Y71 - Cardiovascular devices associated with ...      | 1.86      | 1.12    | 3.11    | 0.1%  | 3     | 22    | 41     | 70,222 | 2.33E-02  |
| Z20 - Exposure to communicable diseases               | 22.10     | 20.28   | 24.08   | 17.3% | 174   | 545   | 12,043 | 57,526 | 0.00E+00  |
| Z29 - Other prophylactic measures                     | 1.59      | 1.31    | 1.95    | 0.4%  | 32    | 158   | 252    | 69,846 | 4.37E-06  |
| Z37 - Outcome of delivery                             | 3.19      | 2.45    | 4.16    | 0.3%  | 2     | 72    | 230    | 69,984 | 1.65E-19  |
| Z45 - Management of implanted device                  | 1.89      | 1.75    | 2.04    | 2.8%  | 190   | 1,021 | 1,931  | 67,146 | 7.87E-63  |
| Z46 - Fitting/adjustment of other devices             | 3.38      | 3.12    | 3.66    | 3.7%  | 133   | 765   | 2,584  | 66,806 | 1.26E-216 |
| Z51 - Encounter for other medical care                | 1.43      | 1.35    | 1.52    | 3.7%  | 513   | 1,753 | 2,512  | 65,510 | 3.81E-31  |

| eTable 2 / Code                       | OR (Est.) | OR (LI) | OR (UI) | Risk | A     | B     | C     | D      | P-value   |
|---------------------------------------|-----------|---------|---------|------|-------|-------|-------|--------|-----------|
| Z60 - Problems of social environment  | 1.66      | 1.30    | 2.12    | 0.2% | 13    | 103   | 171   | 70,001 | 5.17E-05  |
| Z66 - Do not resuscitate              | 5.51      | 4.92    | 6.17    | 2.8% | 134   | 353   | 1,946 | 67,855 | 9.84E-242 |
| Z74 - Problems of provider dependency | 1.28      | 1.22    | 1.34    | 6.7% | 2,092 | 3,375 | 4,316 | 60,505 | 8.33E-27  |
| Z97 - Presence of other devices       | 1.35      | 1.11    | 1.65    | 0.3% | 13    | 169   | 228   | 69,878 | 3.60E-03  |
| Z99 - Dependence on devices, NEC      | 2.38      | 2.26    | 2.50    | 7.3% | 2,170 | 2,032 | 4,829 | 61,257 | 8.90E-250 |

**eTable 3. Codes that significantly decreased in odds upon being diagnosed with COVID-19 (primary analysis)**

This table shows findings for header-level codes that significantly decreased in odds with COVID-19 at a Bonferroni-corrected level of significance. OR (Est.): odds ratio for association with COVID-19, point estimate. OR (LI) and OR (UI): 95% lower and upper confidence intervals for the odds ratio. OR, Risk, A, B, C, and D are defined in eFigure 3. P-value: p-value from McNemar test (null hypothesis: OR = 1). The significance threshold for this analysis was  $0.05/1,724 = 2.9E-05$ .

*Authors' interpretation:* There are two possible reasons why these codes appear to decrease in odds with COVID-19. The first is that, during the initial stages of COVID-19 treatment, chronic conditions (e.g., “C18 – Malignant neoplasm of colon”) and less severe conditions (e.g., “B35 – Dermatophytosis”) were not considered priorities for care, and therefore these conditions were less likely to be captured in a claim. The second possible reason is that, for acute conditions, the baseline period (90 days in duration) could be accruing more events than the hazard period (38 days in duration) because it is longer in duration. This could explain why “I63 – Cerebral Infarction” appears to decrease in odds with COVID-19 in this analysis (OR: 0.58, 95% CI: 0.54-0.63), while it slightly increases in odds (OR: 1.13, 95% CI: 1.04-1.23) when using a shorter baseline period, as seen later in eTable 10.

| eTable 3 / Code                                    | OR (Est.) | OR (LI) | OR (UI) | Risk | A   | B     | C   | D      | P-value   |
|----------------------------------------------------|-----------|---------|---------|------|-----|-------|-----|--------|-----------|
| A63 - Other predominantly sexually transmitted ... | 0.23      | 0.12    | 0.45    | 0.0% | 1   | 44    | 10  | 70,233 | 7.10E-06  |
| A64 - Unspecified sexually transmitted disease     | 0.07      | 0.02    | 0.22    | 0.0% | 2   | 41    | 3   | 70,242 | 2.43E-08  |
| A74 - Other diseases caused by ...                 | 0.11      | 0.03    | 0.33    | 0.0% | 0   | 28    | 3   | 70,257 | 1.63E-05  |
| B00 - Herpesviral [herpes simplex] infections      | 0.26      | 0.20    | 0.35    | 0.1% | 29  | 222   | 58  | 69,979 | 2.01E-22  |
| B02 - Zoster [herpes zoster]                       | 0.31      | 0.24    | 0.39    | 0.1% | 44  | 252   | 77  | 69,915 | 8.56E-22  |
| B07 - Viral warts                                  | 0.03      | 0.02    | 0.07    | 0.0% | 5   | 202   | 7   | 70,074 | 4.66E-41  |
| B18 - Chronic viral hepatitis                      | 0.46      | 0.38    | 0.55    | 0.2% | 138 | 334   | 153 | 69,663 | 3.45E-16  |
| B19 - Unspecified viral hepatitis                  | 0.47      | 0.38    | 0.57    | 0.2% | 82  | 298   | 139 | 69,769 | 4.09E-14  |
| B20 - Human immunodeficiency virus [HIV] ...       | 0.52      | 0.41    | 0.66    | 0.1% | 260 | 200   | 104 | 69,724 | 5.08E-08  |
| B35 - Dermatophytosis                              | 0.04      | 0.04    | 0.05    | 0.3% | 192 | 4,936 | 215 | 64,945 | 0.00E+00  |
| B36 - Other superficial mycoses                    | 0.26      | 0.17    | 0.39    | 0.0% | 11  | 111   | 29  | 70,137 | 7.61E-12  |
| B37 - Candidiasis                                  | 0.66      | 0.60    | 0.73    | 0.9% | 102 | 895   | 592 | 68,699 | 4.82E-15  |
| B85 - Pediculosis and phthiriasis                  | 0.00      | 0.00    | 0.23    | 0.0% | 0   | 18    | 0   | 70,270 | 7.63E-06  |
| B86 - Scabies                                      | 0.19      | 0.09    | 0.38    | 0.0% | 0   | 48    | 9   | 70,231 | 4.82E-07  |
| C18 - Malignant neoplasm of colon                  | 0.27      | 0.20    | 0.37    | 0.1% | 123 | 177   | 48  | 69,940 | 1.42E-17  |
| C20 - Malignant neoplasm of rectum                 | 0.29      | 0.16    | 0.52    | 0.0% | 28  | 48    | 14  | 70,198 | 2.78E-05  |
| C43 - Malignant melanoma of skin                   | 0.25      | 0.13    | 0.48    | 0.0% | 17  | 44    | 11  | 70,216 | 1.60E-05  |
| C44 - Other and unspecified malignant ...          | 0.16      | 0.12    | 0.21    | 0.1% | 47  | 337   | 53  | 69,851 | 1.42E-46  |
| C50 - Malignant neoplasm of breast                 | 0.30      | 0.24    | 0.36    | 0.2% | 240 | 404   | 120 | 69,524 | 4.15E-35  |
| C54 - Malignant neoplasm of corpus ...             | 0.30      | 0.17    | 0.52    | 0.0% | 23  | 53    | 16  | 70,196 | 1.46E-05  |
| C61 - Malignant neoplasm of prostate               | 0.27      | 0.22    | 0.32    | 0.2% | 284 | 613   | 163 | 69,228 | 1.90E-58  |
| C64 - Malignant neoplasm of kidney, ...            | 0.38      | 0.26    | 0.54    | 0.1% | 49  | 109   | 41  | 70,089 | 4.49E-08  |
| C67 - Malignant neoplasm of bladder                | 0.20      | 0.14    | 0.30    | 0.0% | 61  | 161   | 33  | 70,033 | 7.65E-20  |
| C73 - Malignant neoplasm of thyroid ...            | 0.16      | 0.09    | 0.28    | 0.0% | 13  | 82    | 13  | 70,180 | 3.02E-12  |
| C77 - Secondary and unspecified malignant ...      | 0.22      | 0.15    | 0.34    | 0.0% | 26  | 129   | 29  | 70,104 | 3.38E-15  |
| C78 - Secondary malignant neoplasm of ...          | 0.57      | 0.45    | 0.74    | 0.1% | 76  | 169   | 97  | 69,946 | 1.34E-05  |
| C79 - Secondary malignant neoplasm of ...          | 0.46      | 0.37    | 0.57    | 0.2% | 169 | 240   | 110 | 69,769 | 5.37E-12  |
| C80 - Malignant neoplasm without specification ... | 0.41      | 0.29    | 0.59    | 0.1% | 17  | 102   | 42  | 70,127 | 8.80E-07  |
| C83 - Non-follicular lymphoma                      | 0.24      | 0.14    | 0.40    | 0.0% | 66  | 71    | 17  | 70,134 | 1.61E-08  |
| D03 - Melanoma in situ                             | 0.05      | 0.00    | 0.30    | 0.0% | 2   | 21    | 1   | 70,264 | 1.10E-05  |
| D04 - Carcinoma in situ of ...                     | 0.03      | 0.01    | 0.13    | 0.0% | 3   | 58    | 2   | 70,225 | 1.24E-12  |
| D05 - Carcinoma in situ of ...                     | 0.23      | 0.13    | 0.40    | 0.0% | 11  | 62    | 14  | 70,201 | 7.00E-08  |
| D12 - Benign neoplasm of colon, ...                | 0.08      | 0.06    | 0.10    | 0.1% | 8   | 597   | 45  | 69,638 | 7.50E-105 |
| D13 - Benign neoplasm of other ...                 | 0.16      | 0.08    | 0.33    | 0.0% | 1   | 51    | 8   | 70,228 | 4.55E-08  |
| D17 - Benign lipomatous neoplasm                   | 0.13      | 0.08    | 0.21    | 0.0% | 8   | 136   | 17  | 70,127 | 1.43E-21  |
| D18 - Hemangioma and lymphangioma, any ...         | 0.12      | 0.07    | 0.18    | 0.0% | 11  | 181   | 21  | 70,075 | 4.71E-29  |

| eTable 3 / Code                                   | OR (Est.) | OR (LI) | OR (UI) | Risk  | A      | B      | C     | D      | P-value   |
|---------------------------------------------------|-----------|---------|---------|-------|--------|--------|-------|--------|-----------|
| D21 - Other benign neoplasms of ...               | 0.20      | 0.10    | 0.40    | 0.0%  | 0      | 49     | 10    | 70,229 | 7.53E-07  |
| D22 - Melanocytic nevi                            | 0.04      | 0.03    | 0.07    | 0.0%  | 3      | 492    | 21    | 69,772 | 1.20E-95  |
| D23 - Other benign neoplasms of ...               | 0.04      | 0.02    | 0.07    | 0.0%  | 1      | 233    | 9     | 70,045 | 1.32E-46  |
| D24 - Benign neoplasm of breast                   | 0.08      | 0.02    | 0.23    | 0.0%  | 2      | 40     | 3     | 70,243 | 4.02E-08  |
| D25 - Leiomyoma of uterus                         | 0.14      | 0.10    | 0.19    | 0.1%  | 18     | 295    | 41    | 69,934 | 2.47E-43  |
| D27 - Benign neoplasm of ovary                    | 0.00      | 0.00    | 0.24    | 0.0%  | 0      | 17     | 0     | 70,271 | 1.53E-05  |
| D29 - Benign neoplasm of male ...                 | 0.12      | 0.04    | 0.33    | 0.0%  | 6      | 33     | 4     | 70,245 | 4.16E-06  |
| D31 - Benign neoplasm of eye ...                  | 0.07      | 0.03    | 0.16    | 0.0%  | 4      | 86     | 6     | 70,192 | 1.78E-16  |
| D32 - Benign neoplasm of meninges                 | 0.36      | 0.24    | 0.54    | 0.0%  | 28     | 86     | 31    | 70,143 | 5.97E-07  |
| D35 - Benign neoplasm of other ...                | 0.22      | 0.15    | 0.33    | 0.0%  | 25     | 127    | 28    | 70,108 | 3.50E-15  |
| D36 - Benign neoplasm of other ...                | 0.12      | 0.05    | 0.27    | 0.0%  | 1      | 51     | 6     | 70,230 | 5.61E-09  |
| D41 - Neoplasm of uncertain behavior ...          | 0.16      | 0.07    | 0.35    | 0.0%  | 5      | 44     | 7     | 70,232 | 4.63E-07  |
| D46 - Myelodysplastic syndromes                   | 0.41      | 0.28    | 0.58    | 0.1%  | 65     | 101    | 41    | 70,081 | 7.38E-07  |
| D47 - Other neoplasms of uncertain ...            | 0.56      | 0.47    | 0.68    | 0.2%  | 71     | 308    | 173   | 69,736 | 9.97E-10  |
| D48 - Neoplasm of uncertain behavior ...          | 0.07      | 0.05    | 0.10    | 0.1%  | 11     | 519    | 37    | 69,721 | 1.71E-92  |
| D49 - Neoplasms of unspecified behavior           | 0.20      | 0.15    | 0.27    | 0.1%  | 19     | 274    | 55    | 69,940 | 2.83E-33  |
| D50 - Iron deficiency anemia                      | 0.37      | 0.34    | 0.40    | 1.5%  | 793    | 2,742  | 1,012 | 65,741 | 3.38E-175 |
| D51 - Vitamin B12 deficiency anemia               | 0.23      | 0.19    | 0.27    | 0.2%  | 156    | 652    | 148   | 69,332 | 9.45E-71  |
| D52 - Folate deficiency anemia                    | 0.24      | 0.16    | 0.35    | 0.0%  | 14     | 133    | 32    | 70,109 | 6.97E-15  |
| D59 - Acquired hemolytic anemia                   | 0.34      | 0.21    | 0.54    | 0.0%  | 16     | 68     | 23    | 70,181 | 3.98E-06  |
| D62 - Acute posthemorrhagic anemia                | 0.73      | 0.65    | 0.83    | 0.7%  | 91     | 666    | 489   | 69,042 | 2.23E-07  |
| D63 - Anemia in chronic diseases ...              | 0.66      | 0.62    | 0.71    | 1.9%  | 1,244  | 1,889  | 1,249 | 65,906 | 3.85E-30  |
| D64 - Other anemias                               | 0.69      | 0.66    | 0.72    | 5.4%  | 2,306  | 4,930  | 3,414 | 59,638 | 8.89E-62  |
| D75 - Other and unspecified diseases ...          | 0.58      | 0.45    | 0.73    | 0.1%  | 21     | 177    | 102   | 69,988 | 9.41E-06  |
| E03 - Other hypothyroidism                        | 0.47      | 0.44    | 0.50    | 2.7%  | 2,649  | 3,746  | 1,754 | 62,139 | 9.23E-159 |
| E04 - Other nontoxic goiter                       | 0.25      | 0.21    | 0.29    | 0.2%  | 70     | 693    | 171   | 69,354 | 2.70E-70  |
| E05 - Thyrotoxicosis [hyperthyroidism]            | 0.39      | 0.32    | 0.49    | 0.2%  | 90     | 271    | 107   | 69,820 | 5.12E-17  |
| E06 - Thyroiditis                                 | 0.29      | 0.22    | 0.39    | 0.1%  | 34     | 207    | 60    | 69,987 | 4.07E-19  |
| E07 - Other disorders of thyroid                  | 0.38      | 0.30    | 0.48    | 0.1%  | 47     | 274    | 104   | 69,863 | 3.55E-18  |
| E08 - Diabetes mellitus due to ...                | 0.45      | 0.38    | 0.53    | 0.3%  | 139    | 485    | 218   | 69,446 | 1.10E-23  |
| E10 - Type 1 diabetes mellitus                    | 0.33      | 0.29    | 0.38    | 0.4%  | 326    | 762    | 252   | 68,948 | 1.64E-57  |
| E11 - Type 2 diabetes mellitus                    | 0.50      | 0.48    | 0.52    | 7.5%  | 11,833 | 7,619  | 3,799 | 47,037 | 9.46E-280 |
| E13 - Other specified diabetes mellitus           | 0.52      | 0.44    | 0.60    | 0.4%  | 105    | 497    | 256   | 69,430 | 2.21E-18  |
| E21 - Hyperparathyroidism and other disorders ... | 0.27      | 0.21    | 0.35    | 0.1%  | 74     | 301    | 82    | 69,831 | 8.08E-29  |
| E28 - Ovarian dysfunction                         | 0.12      | 0.07    | 0.19    | 0.0%  | 12     | 160    | 19    | 70,097 | 1.26E-25  |
| E29 - Testicular dysfunction                      | 0.08      | 0.06    | 0.12    | 0.0%  | 58     | 349    | 29    | 69,852 | 1.69E-60  |
| E34 - Other endocrine disorders                   | 0.17      | 0.10    | 0.29    | 0.0%  | 11     | 94     | 16    | 70,167 | 2.11E-13  |
| E53 - Deficiency of other B ...                   | 0.20      | 0.17    | 0.23    | 0.3%  | 161    | 985    | 194   | 68,948 | 3.92E-117 |
| E55 - Vitamin D deficiency                        | 0.21      | 0.20    | 0.23    | 1.4%  | 716    | 4,203  | 885   | 64,484 | 0.00E+00  |
| E61 - Deficiency of other nutrient ...            | 0.34      | 0.27    | 0.44    | 0.1%  | 25     | 243    | 83    | 69,937 | 1.29E-18  |
| E66 - Overweight and obesity                      | 0.50      | 0.48    | 0.52    | 4.4%  | 2,258  | 5,560  | 2,765 | 59,705 | 6.23E-206 |
| E72 - Other disorders of amino-acid ...           | 0.37      | 0.27    | 0.51    | 0.1%  | 16     | 139    | 51    | 70,082 | 2.76E-10  |
| E78 - Disorders of lipoprotein metabolism ...     | 0.43      | 0.41    | 0.44    | 10.3% | 7,253  | 12,226 | 5,234 | 45,575 | 0.00E+00  |
| E79 - Disorders of purine and ...                 | 0.23      | 0.16    | 0.33    | 0.1%  | 14     | 157    | 36    | 70,081 | 5.73E-18  |
| E83 - Disorders of mineral metabolism             | 0.45      | 0.32    | 0.63    | 0.1%  | 22     | 107    | 48    | 70,111 | 3.18E-06  |
| F01 - Vascular dementia                           | 0.47      | 0.42    | 0.54    | 0.5%  | 529    | 792    | 375   | 68,592 | 4.10E-34  |
| F02 - Dementia in other diseases ...              | 0.62      | 0.57    | 0.67    | 1.4%  | 1,021  | 1,537  | 957   | 66,773 | 4.42E-31  |
| F03 - Unspecified dementia                        | 0.76      | 0.72    | 0.81    | 3.4%  | 3,008  | 2,875  | 2,199 | 62,206 | 2.64E-21  |
| F06 - Other mental disorders due ...              | 0.28      | 0.24    | 0.33    | 0.3%  | 256    | 679    | 191   | 69,162 | 3.07E-61  |
| F07 - Personality and behavioral disorders ...    | 0.18      | 0.10    | 0.31    | 0.0%  | 11     | 74     | 13    | 70,190 | 1.25E-10  |
| F10 - Alcohol related disorders                   | 0.34      | 0.29    | 0.38    | 0.4%  | 435    | 868    | 292   | 68,693 | 6.04E-64  |

| eTable 3 / Code                                 | OR (Est.) | OR (LI) | OR (UI) | Risk | A     | B     | C     | D      | P-value   |
|-------------------------------------------------|-----------|---------|---------|------|-------|-------|-------|--------|-----------|
| F11 - Opioid related disorders                  | 0.26      | 0.21    | 0.31    | 0.2% | 230   | 571   | 147   | 69,340 | 3.87E-56  |
| F12 - Cannabis related disorders                | 0.28      | 0.21    | 0.36    | 0.1% | 41    | 239   | 66    | 69,942 | 6.94E-23  |
| F13 - Sedative, hypnotic, or anxiolytic ...     | 0.17      | 0.11    | 0.26    | 0.0% | 20    | 131   | 22    | 70,115 | 2.52E-18  |
| F14 - Cocaine related disorders                 | 0.27      | 0.21    | 0.36    | 0.1% | 70    | 249   | 68    | 69,901 | 5.00E-24  |
| F15 - Other stimulant related disorders         | 0.31      | 0.21    | 0.46    | 0.0% | 29    | 112   | 35    | 70,112 | 3.65E-10  |
| F17 - Nicotine dependence                       | 0.45      | 0.41    | 0.49    | 1.1% | 556   | 1,606 | 726   | 67,400 | 4.95E-74  |
| F19 - Other psychoactive substance related ...  | 0.34      | 0.27    | 0.42    | 0.2% | 83    | 340   | 115   | 69,750 | 8.52E-26  |
| F20 - Schizophrenia                             | 0.39      | 0.34    | 0.45    | 0.4% | 705   | 748   | 292   | 68,543 | 3.35E-45  |
| F22 - Delusional disorders                      | 0.26      | 0.19    | 0.35    | 0.1% | 71    | 213   | 55    | 69,949 | 8.78E-22  |
| F23 - Brief psychotic disorder                  | 0.40      | 0.28    | 0.55    | 0.1% | 15    | 124   | 49    | 70,100 | 1.84E-08  |
| F25 - Schizoaffective disorders                 | 0.26      | 0.22    | 0.30    | 0.3% | 544   | 682   | 176   | 68,886 | 1.32E-66  |
| F28 - Other psychotic disorder not ...          | 0.20      | 0.10    | 0.40    | 0.0% | 10    | 49    | 10    | 70,219 | 7.53E-07  |
| F29 - Unspecified psychosis not due ...         | 0.38      | 0.32    | 0.43    | 0.4% | 314   | 672   | 252   | 69,050 | 3.18E-43  |
| F31 - Bipolar disorder                          | 0.33      | 0.29    | 0.37    | 0.5% | 837   | 1,133 | 369   | 67,949 | 2.76E-86  |
| F32 - Major depressive disorder, single ...     | 0.50      | 0.47    | 0.53    | 3.2% | 2,007 | 4,140 | 2,071 | 62,070 | 9.21E-152 |
| F33 - Major depressive disorder, recurrent      | 0.33      | 0.31    | 0.35    | 1.7% | 1,705 | 3,357 | 1,108 | 64,118 | 4.04E-248 |
| F34 - Persistent mood [affective] disorders     | 0.22      | 0.18    | 0.28    | 0.1% | 100   | 362   | 81    | 69,745 | 2.22E-40  |
| F39 - Unspecified mood [affective] disorder     | 0.41      | 0.33    | 0.50    | 0.2% | 102   | 314   | 129   | 69,743 | 2.29E-18  |
| F40 - Phobic anxiety disorders                  | 0.30      | 0.20    | 0.45    | 0.0% | 21    | 102   | 31    | 70,134 | 1.28E-09  |
| F41 - Other anxiety disorders                   | 0.55      | 0.53    | 0.58    | 4.3% | 2,786 | 4,926 | 2,718 | 59,858 | 1.35E-140 |
| F42 - Obsessive-compulsive disorder             | 0.31      | 0.22    | 0.43    | 0.1% | 42    | 144   | 44    | 70,058 | 5.19E-13  |
| F43 - Reaction to severe stress, ...            | 0.29      | 0.26    | 0.32    | 0.8% | 533   | 1,960 | 568   | 67,227 | 1.82E-168 |
| F45 - Somatoform disorders                      | 0.22      | 0.13    | 0.37    | 0.0% | 7     | 81    | 18    | 70,182 | 4.63E-10  |
| F48 - Other nonpsychotic mental disorders       | 0.35      | 0.23    | 0.52    | 0.0% | 36    | 84    | 29    | 70,139 | 3.78E-07  |
| F51 - Sleep disorders not due ...               | 0.30      | 0.25    | 0.35    | 0.3% | 139   | 598   | 178   | 69,373 | 3.94E-51  |
| F52 - Sexual dysfunction not due ...            | 0.12      | 0.05    | 0.27    | 0.0% | 8     | 51    | 6     | 70,223 | 5.61E-09  |
| F60 - Specific personality disorders            | 0.26      | 0.20    | 0.35    | 0.1% | 84    | 209   | 55    | 69,940 | 4.66E-21  |
| F63 - Impulse disorders                         | 0.28      | 0.18    | 0.44    | 0.0% | 17    | 86    | 24    | 70,161 | 6.02E-09  |
| F70 - Mild intellectual disabilities            | 0.21      | 0.14    | 0.33    | 0.0% | 35    | 113   | 24    | 70,116 | 5.55E-14  |
| F71 - Moderate intellectual disabilities        | 0.15      | 0.08    | 0.28    | 0.0% | 22    | 74    | 11    | 70,181 | 1.76E-11  |
| F72 - Severe intellectual disabilities          | 0.19      | 0.11    | 0.35    | 0.0% | 16    | 67    | 13    | 70,192 | 3.11E-09  |
| F73 - Profound intellectual disabilities        | 0.21      | 0.10    | 0.42    | 0.0% | 28    | 43    | 9     | 70,208 | 4.73E-06  |
| F79 - Unspecified intellectual disabilities     | 0.52      | 0.41    | 0.67    | 0.1% | 60    | 183   | 96    | 69,949 | 2.62E-07  |
| F80 - Specific developmental disorders of ...   | 0.31      | 0.21    | 0.45    | 0.0% | 48    | 108   | 33    | 70,099 | 4.61E-10  |
| F84 - Pervasive developmental disorders         | 0.43      | 0.29    | 0.62    | 0.1% | 57    | 87    | 37    | 70,107 | 1.08E-05  |
| F90 - Attention-deficit hyperactivity disorders | 0.20      | 0.15    | 0.25    | 0.1% | 148   | 410   | 80    | 69,650 | 5.76E-50  |
| F91 - Conduct disorders                         | 0.28      | 0.22    | 0.37    | 0.1% | 41    | 239   | 68    | 69,940 | 2.94E-22  |
| F98 - Other behavioral and emotional ...        | 0.39      | 0.25    | 0.61    | 0.0% | 24    | 69    | 27    | 70,168 | 2.86E-05  |
| F99 - Mental disorder, not otherwise ...        | 0.44      | 0.35    | 0.56    | 0.1% | 27    | 220   | 97    | 69,944 | 7.27E-12  |
| G20 - Parkinson's disease                       | 0.61      | 0.53    | 0.71    | 0.4% | 803   | 478   | 293   | 68,714 | 3.44E-11  |
| G21 - Secondary parkinsonism                    | 0.29      | 0.18    | 0.48    | 0.0% | 29    | 68    | 20    | 70,171 | 5.44E-07  |
| G24 - Dystonia                                  | 0.21      | 0.14    | 0.32    | 0.0% | 38    | 128   | 27    | 70,095 | 9.57E-16  |
| G25 - Other extrapyramidal and movement ...     | 0.53      | 0.46    | 0.61    | 0.4% | 223   | 533   | 283   | 69,249 | 2.86E-18  |
| G30 - Alzheimer's disease                       | 0.63      | 0.57    | 0.69    | 1.1% | 1,192 | 1,159 | 729   | 67,208 | 5.44E-23  |
| G31 - Other degenerative diseases of ...        | 0.52      | 0.47    | 0.59    | 0.7% | 318   | 877   | 459   | 68,634 | 3.79E-30  |
| G35 - Multiple sclerosis                        | 0.36      | 0.27    | 0.48    | 0.1% | 301   | 168   | 60    | 69,759 | 1.38E-12  |
| G40 - Epilepsy and recurrent seizures           | 0.67      | 0.62    | 0.74    | 1.1% | 1,058 | 1,137 | 767   | 67,326 | 2.75E-17  |
| G43 - Migraine                                  | 0.33      | 0.29    | 0.37    | 0.4% | 193   | 891   | 292   | 68,912 | 1.05E-67  |
| G44 - Other headache syndromes                  | 0.43      | 0.36    | 0.52    | 0.2% | 29    | 383   | 166   | 69,710 | 3.01E-20  |
| G45 - Transient cerebral ischemic attacks ...   | 0.33      | 0.28    | 0.39    | 0.3% | 122   | 563   | 185   | 69,418 | 3.16E-43  |
| G47 - Sleep disorders                           | 0.45      | 0.42    | 0.47    | 3.2% | 2,461 | 4,538 | 2,020 | 61,269 | 4.33E-212 |



| eTable 3 / Code                                     | OR (Est.) | OR (LI) | OR (UI) | Risk | A     | B     | C     | D      | P-value   |
|-----------------------------------------------------|-----------|---------|---------|------|-------|-------|-------|--------|-----------|
| G50 - Disorders of trigeminal nerve                 | 0.42      | 0.29    | 0.62    | 0.1% | 31    | 88    | 37    | 70,132 | 7.74E-06  |
| G51 - Facial nerve disorders                        | 0.35      | 0.23    | 0.53    | 0.0% | 15    | 86    | 30    | 70,157 | 3.28E-07  |
| G54 - Nerve root and plexus ...                     | 0.22      | 0.14    | 0.35    | 0.0% | 21    | 100   | 22    | 70,145 | 3.14E-12  |
| G56 - Mononeuropathies of upper limb                | 0.10      | 0.08    | 0.14    | 0.1% | 67    | 544   | 56    | 69,621 | 5.86E-88  |
| G57 - Mononeuropathies of lower limb                | 0.22      | 0.16    | 0.31    | 0.1% | 19    | 189   | 42    | 70,038 | 7.54E-22  |
| G58 - Other mononeuropathies                        | 0.19      | 0.10    | 0.34    | 0.0% | 16    | 64    | 12    | 70,196 | 4.91E-09  |
| G60 - Hereditary and idiopathic neuropathy          | 0.19      | 0.15    | 0.25    | 0.1% | 66    | 367   | 70    | 69,785 | 1.63E-45  |
| G62 - Other and unspecified polyneuropathies        | 0.39      | 0.35    | 0.44    | 0.7% | 373   | 1,157 | 455   | 68,303 | 2.91E-68  |
| G63 - Polyneuropathy in diseases classified ...     | 0.30      | 0.19    | 0.48    | 0.0% | 17    | 74    | 22    | 70,175 | 1.94E-07  |
| G81 - Hemiplegia and hemiparesis                    | 0.44      | 0.38    | 0.52    | 0.3% | 223   | 540   | 240   | 69,285 | 9.55E-27  |
| G82 - Paraplegia (paraparesis) and quadriplegia ... | 0.51      | 0.40    | 0.64    | 0.2% | 222   | 223   | 113   | 69,730 | 2.74E-09  |
| G83 - Other paralytic syndromes                     | 0.36      | 0.26    | 0.50    | 0.1% | 29    | 134   | 48    | 70,077 | 2.96E-10  |
| G89 - Pain, not elsewhere classified                | 0.33      | 0.31    | 0.35    | 1.7% | 1,667 | 3,460 | 1,133 | 64,028 | 3.80E-258 |
| G90 - Disorders of autonomic nervous ...            | 0.43      | 0.35    | 0.51    | 0.2% | 126   | 355   | 151   | 69,656 | 1.81E-19  |
| G95 - Other and unspecified diseases ...            | 0.36      | 0.26    | 0.51    | 0.1% | 41    | 125   | 45    | 70,077 | 1.37E-09  |
| H00 - Hordeolum and chalazion                       | 0.10      | 0.06    | 0.17    | 0.0% | 5     | 175   | 18    | 70,090 | 2.93E-29  |
| H01 - Other inflammation of eyelid                  | 0.05      | 0.03    | 0.08    | 0.0% | 20    | 314   | 15    | 69,939 | 1.18E-60  |
| H02 - Other disorders of eyelid                     | 0.07      | 0.05    | 0.10    | 0.0% | 17    | 397   | 27    | 69,847 | 8.20E-72  |
| H04 - Disorders of lacrimal system                  | 0.11      | 0.10    | 0.14    | 0.2% | 84    | 1,281 | 146   | 68,777 | 5.49E-198 |
| H10 - Conjunctivitis                                | 0.25      | 0.22    | 0.30    | 0.3% | 35    | 780   | 198   | 69,275 | 4.81E-77  |
| H11 - Other disorders of conjunctiva                | 0.09      | 0.06    | 0.14    | 0.0% | 4     | 275   | 25    | 69,984 | 7.32E-47  |
| H15 - Disorders of sclera                           | 0.06      | 0.02    | 0.22    | 0.0% | 4     | 34    | 2     | 70,248 | 2.38E-07  |
| H16 - Keratitis                                     | 0.04      | 0.02    | 0.07    | 0.0% | 13    | 303   | 13    | 69,959 | 1.98E-59  |
| H17 - Corneal scars and opacities                   | 0.04      | 0.01    | 0.11    | 0.0% | 0     | 80    | 3     | 70,205 | 7.30E-17  |
| H18 - Other disorders of cornea                     | 0.03      | 0.02    | 0.06    | 0.0% | 9     | 259   | 8     | 70,012 | 7.67E-53  |
| H20 - Iridocyclitis                                 | 0.15      | 0.08    | 0.27    | 0.0% | 11    | 81    | 12    | 70,184 | 1.77E-12  |
| H21 - Other disorders of iris ...                   | 0.06      | 0.02    | 0.17    | 0.0% | 0     | 64    | 4     | 70,220 | 8.38E-13  |
| H25 - Age-related cataract                          | 0.04      | 0.04    | 0.05    | 0.1% | 129   | 2,223 | 100   | 67,836 | 0.00E+00  |
| H26 - Other cataract                                | 0.17      | 0.14    | 0.21    | 0.1% | 72    | 595   | 100   | 69,521 | 2.40E-78  |
| H27 - Other disorders of lens                       | 0.10      | 0.04    | 0.28    | 0.0% | 1     | 39    | 4     | 70,244 | 2.16E-07  |
| H31 - Other disorders of choroid                    | 0.07      | 0.03    | 0.15    | 0.0% | 0     | 98    | 7     | 70,183 | 1.59E-18  |
| H33 - Retinal detachments and breaks                | 0.06      | 0.03    | 0.12    | 0.0% | 7     | 143   | 9     | 70,129 | 3.93E-27  |
| H34 - Retinal vascular occlusions                   | 0.05      | 0.03    | 0.10    | 0.0% | 14    | 167   | 9     | 70,098 | 2.59E-32  |
| H35 - Other retinal disorders                       | 0.08      | 0.07    | 0.10    | 0.2% | 231   | 1,736 | 142   | 68,179 | 8.24E-296 |
| H40 - Glaucoma                                      | 0.17      | 0.16    | 0.19    | 0.6% | 484   | 2,357 | 408   | 67,039 | 2.08E-300 |
| H43 - Disorders of vitreous body                    | 0.04      | 0.03    | 0.05    | 0.1% | 28    | 989   | 37    | 69,234 | 1.04E-193 |
| H44 - Disorders of globe                            | 0.19      | 0.11    | 0.34    | 0.0% | 14    | 72    | 14    | 70,188 | 7.92E-10  |
| H47 - Other disorders of optic ...                  | 0.08      | 0.05    | 0.13    | 0.0% | 16    | 206   | 17    | 70,049 | 2.41E-36  |
| H50 - Other strabismus                              | 0.07      | 0.03    | 0.16    | 0.0% | 9     | 84    | 6     | 70,189 | 4.80E-16  |
| H52 - Disorders of refraction and ...               | 0.02      | 0.02    | 0.03    | 0.1% | 18    | 1,714 | 36    | 68,520 | 0.00E+00  |
| H53 - Visual disturbances                           | 0.17      | 0.14    | 0.20    | 0.2% | 29    | 682   | 114   | 69,463 | 7.87E-90  |
| H54 - Blindness and low vision                      | 0.42      | 0.36    | 0.51    | 0.2% | 175   | 405   | 172   | 69,536 | 4.53E-22  |
| H57 - Other disorders of eye ...                    | 0.19      | 0.14    | 0.25    | 0.1% | 5     | 297   | 55    | 69,931 | 9.13E-38  |
| H60 - Otitis externa                                | 0.21      | 0.15    | 0.28    | 0.1% | 7     | 237   | 49    | 69,995 | 2.02E-28  |
| H61 - Other disorders of external ...               | 0.09      | 0.07    | 0.11    | 0.1% | 27    | 963   | 86    | 69,212 | 4.16E-161 |
| H65 - Nonsuppurative otitis media                   | 0.25      | 0.19    | 0.33    | 0.1% | 14    | 247   | 62    | 69,965 | 1.22E-25  |
| H66 - Suppurative and unspecified otitis ...        | 0.33      | 0.28    | 0.39    | 0.2% | 36    | 493   | 163   | 69,596 | 9.14E-38  |
| H69 - Other and unspecified disorders ...           | 0.19      | 0.14    | 0.26    | 0.1% | 8     | 240   | 45    | 69,995 | 1.45E-30  |
| H72 - Perforation of tympanic membrane              | 0.13      | 0.06    | 0.31    | 0.0% | 1     | 45    | 6     | 70,236 | 1.03E-07  |
| H81 - Disorders of vestibular function              | 0.25      | 0.19    | 0.32    | 0.1% | 44    | 322   | 80    | 69,842 | 2.79E-33  |
| H90 - Conductive and sensorineural hearing ...      | 0.08      | 0.06    | 0.10    | 0.1% | 70    | 897   | 73    | 69,248 | 7.08E-154 |



| eTable 3 / Code                                   | OR (Est.) | OR (LI) | OR (UI) | Risk  | A      | B      | C     | D      | P-value   |
|---------------------------------------------------|-----------|---------|---------|-------|--------|--------|-------|--------|-----------|
| H91 - Other and unspecified hearing ...           | 0.56      | 0.48    | 0.64    | 0.4%  | 119    | 541    | 301   | 69,327 | 1.77E-16  |
| H92 - Otaglia and effusion of ...                 | 0.37      | 0.31    | 0.45    | 0.2%  | 5      | 405    | 150   | 69,728 | 4.20E-27  |
| H93 - Other disorders of ear, ...                 | 0.14      | 0.10    | 0.19    | 0.1%  | 13     | 340    | 47    | 69,888 | 7.70E-50  |
| I05 - Rheumatic mitral valve diseases             | 0.36      | 0.25    | 0.52    | 0.1%  | 6      | 103    | 37    | 70,142 | 3.94E-08  |
| I07 - Rheumatic tricuspid valve diseases          | 0.53      | 0.41    | 0.69    | 0.1%  | 16     | 162    | 86    | 70,024 | 1.91E-06  |
| I08 - Multiple valve diseases                     | 0.44      | 0.35    | 0.54    | 0.2%  | 22     | 277    | 121   | 69,868 | 7.88E-15  |
| I10 - Essential (primary) hypertension            | 0.55      | 0.54    | 0.57    | 18.3% | 14,990 | 13,756 | 7,583 | 33,959 | 0.00E+00  |
| I11 - Hypertensive heart disease                  | 0.63      | 0.59    | 0.67    | 2.3%  | 937    | 2,410  | 1,524 | 65,417 | 3.30E-45  |
| I13 - Hypertensive heart and chronic ...          | 0.83      | 0.76    | 0.89    | 1.7%  | 818    | 1,382  | 1,143 | 66,945 | 2.18E-06  |
| I16 - Hypertensive crisis                         | 0.59      | 0.52    | 0.68    | 0.4%  | 75     | 526    | 312   | 69,375 | 1.87E-13  |
| I20 - Angina pectoris                             | 0.33      | 0.27    | 0.39    | 0.2%  | 84     | 476    | 156   | 69,572 | 6.79E-37  |
| I25 - Chronic ischemic heart disease              | 0.70      | 0.67    | 0.73    | 4.8%  | 3,930  | 4,304  | 3,000 | 59,054 | 1.74E-52  |
| I27 - Other pulmonary heart diseases              | 0.61      | 0.55    | 0.68    | 0.8%  | 338    | 850    | 521   | 68,579 | 8.12E-19  |
| I34 - Nonrheumatic mitral valve disorders         | 0.41      | 0.37    | 0.46    | 0.6%  | 166    | 986    | 405   | 68,731 | 1.56E-54  |
| I35 - Nonrheumatic aortic valve disorders         | 0.41      | 0.37    | 0.47    | 0.5%  | 274    | 887    | 367   | 68,760 | 1.23E-48  |
| I36 - Nonrheumatic tricuspid valve disorders      | 0.48      | 0.42    | 0.56    | 0.4%  | 47     | 527    | 255   | 69,459 | 3.29E-22  |
| I42 - Cardiomyopathy                              | 0.60      | 0.54    | 0.67    | 0.8%  | 414    | 926    | 560   | 68,388 | 2.84E-21  |
| I50 - Heart failure                               | 0.89      | 0.85    | 0.94    | 5.0%  | 4,581  | 3,491  | 3,121 | 59,095 | 5.68E-06  |
| I61 - Nontraumatic intracerebral hemorrhage       | 0.49      | 0.39    | 0.63    | 0.1%  | 77     | 188    | 93    | 69,930 | 2.05E-08  |
| I63 - Cerebral infarction                         | 0.58      | 0.54    | 0.63    | 1.5%  | 942    | 1,784  | 1,036 | 66,526 | 6.07E-45  |
| I65 - Occlusion and stenosis of ...               | 0.31      | 0.27    | 0.36    | 0.4%  | 116    | 837    | 261   | 69,074 | 1.88E-67  |
| I66 - Occlusion and stenosis of ...               | 0.37      | 0.23    | 0.57    | 0.0%  | 6      | 71     | 26    | 70,185 | 7.91E-06  |
| I67 - Other cerebrovascular diseases              | 0.50      | 0.45    | 0.55    | 0.8%  | 321    | 1,063  | 531   | 68,373 | 2.32E-40  |
| I69 - Sequelae of cerebrovascular disease         | 0.70      | 0.64    | 0.76    | 1.5%  | 1,615  | 1,448  | 1,011 | 66,214 | 1.46E-18  |
| I70 - Atherosclerosis                             | 0.21      | 0.19    | 0.23    | 0.8%  | 310    | 2,570  | 549   | 66,859 | 1.83E-286 |
| I71 - Aortic aneurysm and dissection              | 0.50      | 0.43    | 0.59    | 0.3%  | 140    | 412    | 207   | 69,529 | 2.41E-16  |
| I72 - Other aneurysm                              | 0.42      | 0.30    | 0.60    | 0.1%  | 15     | 104    | 44    | 70,125 | 1.24E-06  |
| I77 - Other disorders of arteries ...             | 0.49      | 0.42    | 0.56    | 0.4%  | 62     | 599    | 292   | 69,335 | 1.17E-24  |
| I78 - Diseases of capillaries                     | 0.04      | 0.01    | 0.12    | 0.0%  | 1      | 77     | 3     | 70,207 | 3.30E-16  |
| I79 - Disorders of arteries, arterioles ...       | 0.03      | 0.01    | 0.19    | 0.0%  | 4      | 31     | 1     | 70,252 | 2.95E-07  |
| I83 - Varicose veins of lower ...                 | 0.15      | 0.12    | 0.19    | 0.1%  | 65     | 548    | 84    | 69,591 | 9.57E-76  |
| I85 - Esophageal varices                          | 0.25      | 0.16    | 0.37    | 0.0%  | 18     | 113    | 28    | 70,129 | 1.50E-12  |
| I86 - Varicose veins of other ...                 | 0.17      | 0.09    | 0.32    | 0.0%  | 5      | 64     | 11    | 70,208 | 1.92E-09  |
| I87 - Other disorders of veins                    | 0.23      | 0.21    | 0.26    | 0.5%  | 342    | 1,464  | 343   | 68,139 | 5.49E-153 |
| I89 - Other noninfective disorders of ...         | 0.30      | 0.25    | 0.37    | 0.2%  | 181    | 387    | 118   | 69,602 | 8.68E-33  |
| I96 - Gangrene, not elsewhere classified          | 0.36      | 0.28    | 0.46    | 0.1%  | 52     | 235    | 85    | 69,916 | 8.13E-17  |
| I97 - Intraoperative and postprocedural comp. ... | 0.31      | 0.19    | 0.50    | 0.0%  | 10     | 68     | 21    | 70,189 | 1.08E-06  |
| I99 - Other and unspecified disorders ...         | 0.53      | 0.40    | 0.70    | 0.1%  | 12     | 145    | 77    | 70,054 | 6.90E-06  |
| J00 - Acute nasopharyngitis [common cold]         | 0.40      | 0.32    | 0.49    | 0.2%  | 22     | 301    | 120   | 69,845 | 1.74E-18  |
| J01 - Acute sinusitis                             | 0.29      | 0.26    | 0.32    | 0.8%  | 130    | 1,796  | 523   | 67,839 | 9.42E-154 |
| J02 - Acute pharyngitis                           | 0.71      | 0.66    | 0.77    | 1.8%  | 165    | 1,770  | 1,264 | 67,089 | 4.81E-20  |
| J03 - Acute tonsillitis                           | 0.28      | 0.19    | 0.42    | 0.0%  | 9      | 116    | 33    | 70,130 | 1.85E-11  |
| J04 - Acute laryngitis and tracheitis             | 0.34      | 0.23    | 0.48    | 0.1%  | 3      | 113    | 38    | 70,134 | 1.72E-09  |
| J09 - Influenza due to certain ...                | 0.26      | 0.20    | 0.35    | 0.1%  | 16     | 253    | 67    | 69,952 | 4.56E-25  |
| J10 - Influenza due to other ...                  | 0.27      | 0.23    | 0.31    | 0.4%  | 33     | 979    | 263   | 69,013 | 1.63E-91  |
| J11 - Influenza due to unidentified ...           | 0.53      | 0.47    | 0.58    | 0.8%  | 26     | 1,022  | 537   | 68,703 | 1.52E-34  |
| J30 - Vasomotor and allergic rhinitis             | 0.48      | 0.44    | 0.52    | 1.3%  | 443    | 1,867  | 894   | 67,084 | 2.13E-76  |
| J31 - Chronic rhinitis, nasopharyngitis and ...   | 0.27      | 0.21    | 0.33    | 0.2%  | 52     | 400    | 106   | 69,730 | 8.77E-39  |
| J32 - Chronic sinusitis                           | 0.32      | 0.28    | 0.37    | 0.4%  | 84     | 821    | 266   | 69,117 | 2.31E-63  |
| J33 - Nasal polyp                                 | 0.09      | 0.03    | 0.23    | 0.0%  | 8      | 47     | 4     | 70,229 | 4.07E-09  |
| J34 - Other and unspecified disorders ...         | 0.37      | 0.32    | 0.43    | 0.3%  | 26     | 598    | 221   | 69,443 | 1.98E-39  |

| eTable 3 / Code                                   | OR (Est.) | OR (LI) | OR (UI) | Risk | A     | B     | C     | D      | P-value   |
|---------------------------------------------------|-----------|---------|---------|------|-------|-------|-------|--------|-----------|
| J35 - Chronic diseases of tonsils ...             | 0.24      | 0.14    | 0.39    | 0.0% | 4     | 80    | 19    | 70,185 | 1.64E-09  |
| J37 - Chronic laryngitis and laryngotracheitis    | 0.10      | 0.04    | 0.26    | 0.0% | 0     | 41    | 4     | 70,243 | 8.03E-08  |
| J38 - Diseases of vocal cords ...                 | 0.43      | 0.31    | 0.59    | 0.1% | 16    | 115   | 49    | 70,108 | 3.86E-07  |
| J41 - Simple and mucopurulent chronic ...         | 0.54      | 0.41    | 0.72    | 0.1% | 27    | 137   | 74    | 70,050 | 1.97E-05  |
| K02 - Dental caries                               | 0.24      | 0.15    | 0.38    | 0.0% | 7     | 96    | 23    | 70,162 | 4.11E-11  |
| K04 - Diseases of pulp and ...                    | 0.30      | 0.20    | 0.44    | 0.0% | 2     | 110   | 33    | 70,143 | 2.08E-10  |
| K08 - Other disorders of teeth ...                | 0.21      | 0.16    | 0.29    | 0.1% | 8     | 233   | 50    | 69,997 | 2.80E-27  |
| K11 - Diseases of salivary glands                 | 0.42      | 0.30    | 0.58    | 0.1% | 10    | 121   | 51    | 70,106 | 1.43E-07  |
| K12 - Stomatitis and related lesions              | 0.43      | 0.30    | 0.61    | 0.1% | 7     | 102   | 44    | 70,135 | 2.39E-06  |
| K13 - Other diseases of lip ...                   | 0.50      | 0.36    | 0.69    | 0.1% | 1     | 112   | 56    | 70,119 | 2.20E-05  |
| K20 - Esophagitis                                 | 0.25      | 0.19    | 0.32    | 0.1% | 21    | 286   | 71    | 69,910 | 9.75E-30  |
| K21 - Gastro-esophageal reflux disease            | 0.54      | 0.51    | 0.56    | 5.1% | 2,786 | 5,828 | 3,127 | 58,547 | 4.71E-179 |
| K22 - Other diseases of esophagus                 | 0.28      | 0.23    | 0.33    | 0.2% | 95    | 559   | 156   | 69,478 | 4.40E-51  |
| K25 - Gastric ulcer                               | 0.27      | 0.21    | 0.36    | 0.1% | 30    | 233   | 64    | 69,961 | 1.87E-22  |
| K27 - Peptic ulcer, site unspecified              | 0.51      | 0.39    | 0.67    | 0.1% | 26    | 157   | 80    | 70,025 | 7.94E-07  |
| K29 - Gastritis and duodenitis                    | 0.26      | 0.23    | 0.30    | 0.5% | 119   | 1,218 | 318   | 68,633 | 1.92E-116 |
| K30 - Functional dyspepsia                        | 0.30      | 0.22    | 0.40    | 0.1% | 21    | 188   | 56    | 70,023 | 5.01E-17  |
| K31 - Other diseases of stomach ...               | 0.24      | 0.20    | 0.28    | 0.2% | 96    | 717   | 169   | 69,306 | 2.01E-75  |
| K40 - Inguinal hernia                             | 0.25      | 0.19    | 0.34    | 0.1% | 32    | 230   | 58    | 69,968 | 7.03E-24  |
| K42 - Umbilical hernia                            | 0.38      | 0.29    | 0.49    | 0.1% | 18    | 208   | 78    | 69,984 | 2.39E-14  |
| K43 - Ventral hernia                              | 0.23      | 0.17    | 0.31    | 0.1% | 28    | 223   | 52    | 69,985 | 1.17E-24  |
| K44 - Diaphragmatic hernia                        | 0.42      | 0.37    | 0.48    | 0.4% | 71    | 662   | 279   | 69,276 | 1.35E-35  |
| K46 - Unspecified abdominal hernia                | 0.30      | 0.19    | 0.47    | 0.0% | 10    | 80    | 24    | 70,174 | 6.92E-08  |
| K51 - Ulcerative colitis                          | 0.48      | 0.36    | 0.63    | 0.1% | 77    | 154   | 74    | 69,983 | 1.68E-07  |
| K52 - Other and unspecified noninfective ...      | 0.52      | 0.46    | 0.59    | 0.6% | 72    | 823   | 430   | 68,963 | 1.67E-28  |
| K55 - Vascular disorders of intestine             | 0.41      | 0.29    | 0.57    | 0.1% | 13    | 113   | 46    | 70,116 | 1.66E-07  |
| K56 - Paralytic ileus and intestinal ...          | 0.70      | 0.61    | 0.80    | 0.5% | 102   | 516   | 361   | 69,309 | 1.99E-07  |
| K57 - Diverticular disease of intestine           | 0.39      | 0.35    | 0.43    | 0.7% | 188   | 1,298 | 505   | 68,297 | 1.21E-77  |
| K58 - Irritable bowel syndrome                    | 0.45      | 0.38    | 0.54    | 0.3% | 127   | 386   | 175   | 69,600 | 7.57E-19  |
| K59 - Other functional intestinal disorders       | 0.52      | 0.49    | 0.55    | 2.6% | 939   | 3,327 | 1,740 | 64,282 | 5.69E-110 |
| K60 - Fissure and fistula of ...                  | 0.22      | 0.12    | 0.40    | 0.0% | 6     | 59    | 13    | 70,210 | 1.14E-07  |
| K62 - Other diseases of anus ...                  | 0.31      | 0.26    | 0.36    | 0.3% | 41    | 662   | 204   | 69,381 | 2.19E-54  |
| K63 - Other diseases of intestine                 | 0.25      | 0.22    | 0.29    | 0.3% | 45    | 782   | 197   | 69,264 | 9.59E-78  |
| K64 - Hemorrhoids and perianal venous ...         | 0.15      | 0.12    | 0.18    | 0.2% | 53    | 945   | 140   | 69,150 | 1.39E-131 |
| K70 - Alcoholic liver disease                     | 0.56      | 0.43    | 0.72    | 0.1% | 129   | 153   | 85    | 69,921 | 1.41E-05  |
| K73 - Chronic hepatitis, not elsewhere ...        | 0.10      | 0.03    | 0.31    | 0.0% | 4     | 30    | 3     | 70,251 | 6.01E-06  |
| K74 - Fibrosis and cirrhosis of ...               | 0.49      | 0.41    | 0.59    | 0.3% | 232   | 358   | 176   | 69,522 | 4.78E-15  |
| K75 - Other inflammatory liver diseases           | 0.60      | 0.47    | 0.75    | 0.2% | 56    | 183   | 109   | 69,940 | 1.94E-05  |
| K76 - Other diseases of liver                     | 0.43      | 0.39    | 0.48    | 0.7% | 138   | 1,171 | 504   | 68,475 | 1.54E-59  |
| K80 - Cholelithiasis                              | 0.50      | 0.44    | 0.57    | 0.5% | 80    | 680   | 343   | 69,185 | 8.18E-26  |
| K83 - Other diseases of biliary ...               | 0.48      | 0.37    | 0.60    | 0.1% | 37    | 208   | 99    | 69,944 | 7.10E-10  |
| K86 - Other diseases of pancreas                  | 0.47      | 0.38    | 0.58    | 0.2% | 68    | 270   | 126   | 69,824 | 6.67E-13  |
| K90 - Intestinal malabsorption                    | 0.22      | 0.15    | 0.32    | 0.0% | 15    | 142   | 31    | 70,100 | 6.11E-17  |
| K91 - Intraoperative and postprocedural comp. ... | 0.25      | 0.17    | 0.37    | 0.0% | 20    | 126   | 32    | 70,110 | 1.38E-13  |
| K92 - Other diseases of digestive ...             | 0.81      | 0.74    | 0.89    | 1.3% | 252   | 1,112 | 904   | 68,020 | 4.02E-06  |
| K94 - Complications of artificial openings ...    | 0.44      | 0.36    | 0.55    | 0.2% | 49    | 257   | 114   | 69,868 | 1.68E-13  |
| L01 - Impetigo                                    | 0.24      | 0.13    | 0.44    | 0.0% | 0     | 54    | 13    | 70,221 | 1.02E-06  |
| L02 - Cutaneous abscess, furuncle and ...         | 0.28      | 0.24    | 0.33    | 0.3% | 86    | 666   | 189   | 69,347 | 1.39E-59  |
| L03 - Cellulitis and acute lymphangitis           | 0.28      | 0.26    | 0.31    | 0.8% | 417   | 1,819 | 515   | 67,537 | 3.25E-160 |
| L08 - Other local infections of ...               | 0.28      | 0.23    | 0.34    | 0.2% | 44    | 447   | 125   | 69,672 | 4.51E-41  |
| L20 - Atopic dermatitis                           | 0.22      | 0.17    | 0.29    | 0.1% | 29    | 266   | 59    | 69,934 | 3.07E-30  |

| eTable 3 / Code                                      | OR (Est.) | OR (LI) | OR (UI) | Risk | A     | B     | C     | D      | P-value   |
|------------------------------------------------------|-----------|---------|---------|------|-------|-------|-------|--------|-----------|
| L21 - Seborrheic dermatitis                          | 0.12      | 0.09    | 0.17    | 0.1% | 26    | 300   | 37    | 69,925 | 3.27E-46  |
| L23 - Allergic contact dermatitis                    | 0.24      | 0.16    | 0.37    | 0.0% | 6     | 108   | 26    | 70,148 | 2.61E-12  |
| L24 - Irritant contact dermatitis                    | 0.32      | 0.20    | 0.52    | 0.0% | 3     | 71    | 23    | 70,191 | 1.25E-06  |
| L25 - Unspecified contact dermatitis                 | 0.21      | 0.16    | 0.29    | 0.1% | 15    | 224   | 48    | 70,001 | 2.65E-26  |
| L28 - Lichen simplex chronicus and ...               | 0.13      | 0.07    | 0.23    | 0.0% | 5     | 100   | 13    | 70,170 | 5.96E-16  |
| L29 - Pruritus                                       | 0.21      | 0.17    | 0.25    | 0.2% | 43    | 597   | 124   | 69,524 | 3.62E-69  |
| L30 - Other and unspecified dermatitis               | 0.25      | 0.22    | 0.29    | 0.3% | 85    | 948   | 237   | 69,018 | 1.63E-94  |
| L40 - Psoriasis                                      | 0.21      | 0.17    | 0.27    | 0.1% | 92    | 359   | 76    | 69,761 | 1.18E-41  |
| L50 - Urticaria                                      | 0.22      | 0.16    | 0.31    | 0.1% | 26    | 189   | 42    | 70,031 | 7.54E-22  |
| L53 - Other erythematous conditions                  | 0.26      | 0.19    | 0.35    | 0.1% | 6     | 203   | 52    | 70,027 | 5.81E-21  |
| L57 - Skin changes due to ...                        | 0.07      | 0.05    | 0.09    | 0.1% | 16    | 623   | 43    | 69,606 | 1.76E-111 |
| L60 - Nail disorders                                 | 0.04      | 0.03    | 0.06    | 0.1% | 55    | 1,550 | 67    | 68,616 | 2.46E-297 |
| L63 - Alopecia areata                                | 0.06      | 0.02    | 0.22    | 0.0% | 3     | 34    | 2     | 70,249 | 2.38E-07  |
| L64 - Androgenic alopecia                            | 0.05      | 0.00    | 0.28    | 0.0% | 2     | 22    | 1     | 70,263 | 5.72E-06  |
| L65 - Other nonscarring hair loss                    | 0.09      | 0.05    | 0.16    | 0.0% | 9     | 127   | 11    | 70,141 | 1.25E-22  |
| L66 - Cicatricial alopecia [scarring hair ...        | 0.03      | 0.01    | 0.18    | 0.0% | 3     | 33    | 1     | 70,251 | 1.06E-07  |
| L68 - Hypertrichosis                                 | 0.04      | 0.01    | 0.21    | 0.0% | 3     | 28    | 1     | 70,256 | 1.38E-06  |
| L70 - Acne                                           | 0.13      | 0.09    | 0.18    | 0.1% | 33    | 296   | 37    | 69,922 | 2.21E-45  |
| L71 - Rosacea                                        | 0.15      | 0.09    | 0.24    | 0.0% | 15    | 122   | 18    | 70,133 | 3.17E-18  |
| L72 - Follicular cysts of skin ...                   | 0.06      | 0.04    | 0.10    | 0.0% | 10    | 288   | 17    | 69,973 | 6.44E-54  |
| L73 - Other follicular disorders                     | 0.12      | 0.08    | 0.18    | 0.0% | 14    | 227   | 27    | 70,020 | 8.86E-36  |
| L76 - Intraoperative and postprocedural comp. ...    | 0.24      | 0.14    | 0.42    | 0.0% | 2     | 66    | 16    | 70,204 | 6.26E-08  |
| L81 - Other disorders of pigmentation                | 0.08      | 0.06    | 0.11    | 0.1% | 7     | 466   | 38    | 69,777 | 1.16E-80  |
| L82 - Seborrheic keratosis                           | 0.07      | 0.05    | 0.09    | 0.1% | 9     | 687   | 48    | 69,544 | 1.88E-122 |
| L83 - Acanthosis nigricans                           | 0.04      | 0.01    | 0.24    | 0.0% | 1     | 24    | 1     | 70,262 | 1.08E-05  |
| L84 - Corns and callosities                          | 0.04      | 0.03    | 0.06    | 0.1% | 37    | 899   | 36    | 69,316 | 7.66E-175 |
| L85 - Other epidermal thickening                     | 0.09      | 0.07    | 0.11    | 0.1% | 41    | 1,004 | 90    | 69,153 | 1.01E-167 |
| L90 - Atrophic disorders of skin                     | 0.11      | 0.07    | 0.18    | 0.0% | 7     | 177   | 20    | 70,084 | 1.07E-28  |
| L91 - Hypertrophic disorders of skin                 | 0.06      | 0.04    | 0.12    | 0.0% | 4     | 185   | 12    | 70,087 | 1.59E-34  |
| L92 - Granulomatous disorders of skin ...            | 0.14      | 0.07    | 0.27    | 0.0% | 2     | 71    | 10    | 70,205 | 2.62E-11  |
| L97 - Non-pressure chronic ulcer of ...              | 0.25      | 0.22    | 0.28    | 0.5% | 468   | 1,259 | 311   | 68,250 | 3.05E-126 |
| L98 - Other disorders of skin ...                    | 0.29      | 0.25    | 0.33    | 0.3% | 98    | 737   | 211   | 69,242 | 3.42E-65  |
| M05 - Rheumatoid arthritis with rheumatoid ...       | 0.24      | 0.19    | 0.32    | 0.1% | 91    | 277   | 67    | 69,853 | 1.88E-29  |
| M06 - Other rheumatoid arthritis                     | 0.50      | 0.43    | 0.57    | 0.4% | 403   | 618   | 306   | 68,961 | 1.44E-24  |
| M10 - Gout                                           | 0.54      | 0.49    | 0.60    | 0.9% | 477   | 1,088 | 588   | 68,135 | 3.56E-34  |
| M12 - Other and unspecified arthropathy              | 0.28      | 0.22    | 0.36    | 0.1% | 84    | 291   | 81    | 69,832 | 2.32E-27  |
| M13 - Other arthritis                                | 0.38      | 0.30    | 0.48    | 0.1% | 87    | 249   | 94    | 69,858 | 9.16E-17  |
| M14 - Arthropathies in other diseases ...            | 0.18      | 0.10    | 0.33    | 0.0% | 26    | 67    | 12    | 70,183 | 1.24E-09  |
| M15 - Polyosteoarthritis                             | 0.32      | 0.29    | 0.36    | 0.5% | 585   | 1,162 | 373   | 68,168 | 5.70E-90  |
| M16 - Osteoarthritis of hip                          | 0.24      | 0.20    | 0.28    | 0.3% | 110   | 831   | 197   | 69,150 | 9.26E-87  |
| M18 - Osteoarthritis of first carpometacarpal ...    | 0.12      | 0.07    | 0.20    | 0.0% | 7     | 133   | 16    | 70,132 | 2.04E-21  |
| M19 - Other and unspecified osteoarthritis           | 0.37      | 0.35    | 0.39    | 2.1% | 1,138 | 3,696 | 1,358 | 64,096 | 5.32E-237 |
| M1A - Chronic gout                                   | 0.35      | 0.27    | 0.46    | 0.1% | 32    | 209   | 74    | 69,973 | 1.65E-15  |
| M20 - Acquired deformities of fingers ...            | 0.06      | 0.05    | 0.08    | 0.1% | 23    | 808   | 49    | 69,408 | 8.03E-148 |
| M21 - Other acquired deformities of ...              | 0.12      | 0.09    | 0.15    | 0.1% | 62    | 580   | 67    | 69,579 | 4.13E-90  |
| M22 - Disorder of patella                            | 0.06      | 0.03    | 0.12    | 0.0% | 2     | 107   | 6     | 70,173 | 5.09E-21  |
| M23 - Internal derangement of knee                   | 0.09      | 0.05    | 0.16    | 0.0% | 5     | 154   | 14    | 70,115 | 7.85E-27  |
| M24 - Other specific joint derangements              | 0.28      | 0.23    | 0.33    | 0.2% | 177   | 545   | 152   | 69,414 | 7.16E-50  |
| M25 - Other joint disorder, not ...                  | 0.17      | 0.16    | 0.18    | 2.0% | 1,193 | 7,454 | 1,233 | 60,408 | 0.00E+00  |
| M26 - Dentofacial anomalies [including malocclusion] | 0.24      | 0.15    | 0.37    | 0.0% | 12    | 105   | 25    | 70,146 | 4.25E-12  |
| M32 - Systemic lupus erythematosus (SLE)             | 0.59      | 0.46    | 0.75    | 0.1% | 158   | 169   | 99    | 69,862 | 2.50E-05  |

| eTable 3 / Code                                     | OR (Est.) | OR (LI) | OR (UI) | Risk | A     | B     | C     | D      | P-value   |
|-----------------------------------------------------|-----------|---------|---------|------|-------|-------|-------|--------|-----------|
| M35 - Other systemic involvement of ...             | 0.36      | 0.28    | 0.46    | 0.1% | 119   | 253   | 91    | 69,825 | 3.94E-18  |
| M40 - Kyphosis and lordosis                         | 0.23      | 0.14    | 0.35    | 0.0% | 25    | 102   | 23    | 70,138 | 3.03E-12  |
| M41 - Scoliosis                                     | 0.33      | 0.26    | 0.42    | 0.1% | 55    | 247   | 81    | 69,905 | 8.19E-20  |
| M43 - Other deforming dorsopathies                  | 0.17      | 0.14    | 0.22    | 0.1% | 63    | 499   | 86    | 69,640 | 4.59E-65  |
| M46 - Other inflammatory spondylopathies            | 0.19      | 0.15    | 0.24    | 0.1% | 95    | 451   | 86    | 69,656 | 1.34E-55  |
| M47 - Spondylosis                                   | 0.20      | 0.18    | 0.22    | 0.6% | 746   | 1,981 | 388   | 67,173 | 1.18E-234 |
| M48 - Other spondylopathies                         | 0.26      | 0.24    | 0.29    | 0.6% | 394   | 1,560 | 409   | 67,925 | 4.35E-148 |
| M50 - Cervical disc disorders                       | 0.15      | 0.12    | 0.18    | 0.1% | 79    | 691   | 103   | 69,415 | 2.23E-96  |
| M51 - Thoracic, thoracolumbar, and lumbosacral ...  | 0.15      | 0.13    | 0.17    | 0.4% | 236   | 1,679 | 254   | 68,119 | 3.95E-230 |
| M53 - Other and unspecified dorsopathies, ...       | 0.18      | 0.14    | 0.24    | 0.1% | 39    | 377   | 69    | 69,803 | 7.08E-48  |
| M54 - Dorsalgia                                     | 0.22      | 0.21    | 0.23    | 2.6% | 1,673 | 7,164 | 1,592 | 59,859 | 0.00E+00  |
| M60 - Myositis                                      | 0.16      | 0.11    | 0.23    | 0.0% | 11    | 203   | 32    | 70,042 | 1.41E-28  |
| M62 - Other disorders of muscle                     | 0.58      | 0.56    | 0.60    | 5.8% | 4,077 | 6,044 | 3,502 | 56,665 | 4.10E-149 |
| M65 - Synovitis and tenosynovitis                   | 0.07      | 0.05    | 0.10    | 0.0% | 18    | 407   | 28    | 69,835 | 2.07E-73  |
| M66 - Spontaneous rupture of synovium ...           | 0.06      | 0.02    | 0.23    | 0.0% | 0     | 33    | 2     | 70,253 | 3.96E-07  |
| M67 - Other disorders of synovium ...               | 0.09      | 0.05    | 0.14    | 0.0% | 3     | 198   | 17    | 70,070 | 1.22E-34  |
| M70 - Soft tissue disorders related ...             | 0.10      | 0.07    | 0.14    | 0.0% | 22    | 318   | 31    | 69,917 | 6.63E-53  |
| M71 - Other bursopathies                            | 0.20      | 0.14    | 0.29    | 0.0% | 11    | 169   | 34    | 70,074 | 5.21E-21  |
| M72 - Fibroblastic disorders                        | 0.09      | 0.07    | 0.13    | 0.1% | 35    | 466   | 43    | 69,744 | 4.52E-78  |
| M75 - Shoulder lesions                              | 0.09      | 0.07    | 0.11    | 0.1% | 52    | 734   | 64    | 69,438 | 5.48E-124 |
| M76 - Enthesopathies, lower limb, excluding ...     | 0.08      | 0.05    | 0.12    | 0.0% | 14    | 314   | 25    | 69,935 | 3.77E-55  |
| M77 - Other enthesopathies                          | 0.09      | 0.07    | 0.12    | 0.1% | 25    | 577   | 51    | 69,635 | 1.88E-97  |
| M79 - Other and unspecified soft ...                | 0.26      | 0.25    | 0.28    | 3.4% | 1,072 | 7,866 | 2,082 | 59,268 | 0.00E+00  |
| M80 - Osteoporosis with current pathological ...    | 0.34      | 0.24    | 0.48    | 0.1% | 28    | 118   | 40    | 70,102 | 9.02E-10  |
| M81 - Osteoporosis without current pathological ... | 0.39      | 0.35    | 0.43    | 0.8% | 573   | 1,410 | 550   | 67,755 | 7.30E-84  |
| M84 - Disorder of continuity of ...                 | 0.33      | 0.24    | 0.46    | 0.1% | 28    | 153   | 51    | 70,056 | 1.53E-12  |
| M85 - Other disorders of bone ...                   | 0.23      | 0.20    | 0.28    | 0.3% | 106   | 796   | 187   | 69,199 | 8.98E-84  |
| M86 - Osteomyelitis                                 | 0.37      | 0.31    | 0.44    | 0.2% | 227   | 466   | 173   | 69,422 | 7.27E-31  |
| M87 - Osteonecrosis                                 | 0.27      | 0.17    | 0.43    | 0.0% | 30    | 81    | 22    | 70,155 | 1.10E-08  |
| M89 - Other disorders of bone                       | 0.40      | 0.32    | 0.50    | 0.2% | 29    | 268   | 108   | 69,883 | 2.41E-16  |
| M94 - Other disorders of cartilage                  | 0.35      | 0.27    | 0.47    | 0.1% | 6     | 185   | 65    | 70,032 | 5.22E-14  |
| M95 - Other acquired deformities of ...             | 0.18      | 0.09    | 0.38    | 0.0% | 3     | 44    | 8     | 70,233 | 1.21E-06  |
| M96 - Intraoperative and postprocedural comp. ...   | 0.15      | 0.10    | 0.22    | 0.0% | 47    | 211   | 32    | 69,998 | 3.37E-30  |
| M99 - Biomechanical lesions, not elsewhere ...      | 0.07      | 0.05    | 0.09    | 0.1% | 55    | 749   | 49    | 69,435 | 3.57E-135 |
| N04 - Nephrotic syndrome                            | 0.32      | 0.19    | 0.55    | 0.0% | 14    | 53    | 17    | 70,204 | 2.87E-05  |
| N10 - Acute pyelonephritis                          | 0.55      | 0.42    | 0.71    | 0.1% | 23    | 150   | 82    | 70,033 | 1.09E-05  |
| N13 - Obstructive and reflux uropathy               | 0.50      | 0.44    | 0.57    | 0.5% | 252   | 721   | 363   | 68,952 | 2.15E-27  |
| N18 - Chronic kidney disease (CKD)                  | 0.88      | 0.84    | 0.92    | 5.3% | 6,219 | 3,637 | 3,202 | 57,230 | 1.54E-07  |
| N20 - Calculus of kidney and ...                    | 0.34      | 0.30    | 0.39    | 0.4% | 140   | 908   | 311   | 68,929 | 2.46E-65  |
| N21 - Calculus of lower urinary ...                 | 0.23      | 0.12    | 0.43    | 0.0% | 8     | 52    | 12    | 70,216 | 1.09E-06  |
| N23 - Unspecified renal colic                       | 0.20      | 0.11    | 0.38    | 0.0% | 2     | 55    | 11    | 70,220 | 1.20E-07  |
| N25 - Disorders resulting from impaired ...         | 0.30      | 0.27    | 0.34    | 0.5% | 437   | 1,108 | 337   | 68,406 | 3.14E-91  |
| N26 - Unspecified contracted kidney                 | 0.39      | 0.27    | 0.57    | 0.1% | 11    | 95    | 37    | 70,145 | 7.01E-07  |
| N28 - Other disorders of kidney ...                 | 0.53      | 0.48    | 0.57    | 1.2% | 155   | 1,589 | 836   | 67,708 | 1.20E-52  |
| N30 - Cystitis                                      | 0.63      | 0.57    | 0.70    | 0.9% | 134   | 963   | 610   | 68,581 | 6.98E-19  |
| N31 - Neuromuscular dysfunction of bladder, ...     | 0.44      | 0.37    | 0.53    | 0.2% | 282   | 382   | 168   | 69,456 | 1.06E-19  |
| N32 - Other disorders of bladder                    | 0.37      | 0.33    | 0.43    | 0.4% | 191   | 772   | 288   | 69,037 | 8.67E-50  |
| N34 - Urethritis and urethral syndrome              | 0.18      | 0.09    | 0.36    | 0.0% | 0     | 50    | 9     | 70,229 | 1.91E-07  |
| N35 - Urethral stricture                            | 0.24      | 0.15    | 0.39    | 0.0% | 11    | 79    | 19    | 70,179 | 2.52E-09  |
| N39 - Other disorders of urinary ...                | 0.59      | 0.56    | 0.62    | 4.5% | 1,859 | 4,820 | 2,849 | 60,760 | 4.59E-112 |
| N40 - Benign prostatic hyperplasia                  | 0.53      | 0.49    | 0.56    | 1.9% | 1,257 | 2,404 | 1,263 | 65,364 | 4.66E-79  |

| eTable 3 / Code                                    | OR (Est.) | OR (LI) | OR (UI) | Risk | A     | B     | C     | D      | P-value   |
|----------------------------------------------------|-----------|---------|---------|------|-------|-------|-------|--------|-----------|
| N41 - Inflammatory diseases of prostate            | 0.21      | 0.14    | 0.31    | 0.0% | 11    | 134   | 28    | 70,115 | 1.59E-16  |
| N42 - Other and unspecified disorders ...          | 0.14      | 0.09    | 0.24    | 0.0% | 13    | 111   | 16    | 70,148 | 7.36E-17  |
| N43 - Hydrocele and spermatocele                   | 0.09      | 0.05    | 0.17    | 0.0% | 11    | 112   | 10    | 70,155 | 6.01E-20  |
| N45 - Orchitis and epididymitis                    | 0.23      | 0.12    | 0.46    | 0.0% | 6     | 43    | 10    | 70,229 | 1.10E-05  |
| N47 - Disorders of prepuce                         | 0.22      | 0.12    | 0.40    | 0.0% | 1     | 59    | 13    | 70,215 | 1.14E-07  |
| N48 - Other disorders of penis                     | 0.23      | 0.16    | 0.35    | 0.0% | 7     | 124   | 29    | 70,128 | 2.97E-14  |
| N50 - Other and unspecified disorders ...          | 0.22      | 0.16    | 0.31    | 0.1% | 9     | 196   | 44    | 70,039 | 1.90E-22  |
| N52 - Male erectile dysfunction                    | 0.10      | 0.07    | 0.13    | 0.1% | 35    | 620   | 60    | 69,573 | 6.08E-102 |
| N60 - Benign mammary dysplasia                     | 0.06      | 0.04    | 0.10    | 0.0% | 3     | 230   | 14    | 70,041 | 4.20E-43  |
| N61 - Inflammatory disorders of breast             | 0.24      | 0.13    | 0.46    | 0.0% | 6     | 49    | 12    | 70,221 | 4.04E-06  |
| N62 - Hypertrophy of breast                        | 0.17      | 0.09    | 0.32    | 0.0% | 2     | 60    | 10    | 70,216 | 4.72E-09  |
| N63 - Unspecified lump in breast                   | 0.12      | 0.09    | 0.17    | 0.1% | 16    | 326   | 39    | 69,907 | 1.15E-50  |
| N64 - Other disorders of breast                    | 0.08      | 0.06    | 0.12    | 0.0% | 5     | 412   | 34    | 69,837 | 2.82E-71  |
| N72 - Inflammatory disease of cervix ...           | 0.05      | 0.01    | 0.18    | 0.0% | 1     | 42    | 2     | 70,243 | 4.12E-09  |
| N73 - Other female pelvic inflammatory ...         | 0.24      | 0.12    | 0.48    | 0.0% | 2     | 41    | 10    | 70,235 | 2.66E-05  |
| N76 - Other inflammation of vagina ...             | 0.15      | 0.12    | 0.19    | 0.1% | 19    | 600   | 89    | 69,580 | 4.35E-84  |
| N77 - Vulvovaginal ulceration and inflammation ... | 0.05      | 0.00    | 0.30    | 0.0% | 2     | 21    | 1     | 70,264 | 1.10E-05  |
| N80 - Endometriosis                                | 0.08      | 0.04    | 0.18    | 0.0% | 6     | 75    | 6     | 70,201 | 4.17E-14  |
| N81 - Female genital prolapse                      | 0.11      | 0.07    | 0.18    | 0.0% | 15    | 160   | 18    | 70,095 | 4.18E-26  |
| N83 - Noninflammatory disorders of ovary, ...      | 0.21      | 0.16    | 0.28    | 0.1% | 5     | 308   | 66    | 69,909 | 1.21E-35  |
| N84 - Polyp of female genital ...                  | 0.04      | 0.01    | 0.13    | 0.0% | 0     | 72    | 3     | 70,213 | 4.10E-15  |
| N85 - Other noninflammatory disorders of ...       | 0.25      | 0.17    | 0.37    | 0.0% | 1     | 123   | 31    | 70,133 | 2.25E-13  |
| N87 - Dysplasia of cervix uteri                    | 0.10      | 0.04    | 0.25    | 0.0% | 1     | 48    | 5     | 70,234 | 7.97E-09  |
| N88 - Other noninflammatory disorders of ...       | 0.18      | 0.09    | 0.37    | 0.0% | 2     | 49    | 9     | 70,228 | 3.04E-07  |
| N89 - Other noninflammatory disorders of ...       | 0.13      | 0.09    | 0.17    | 0.1% | 7     | 424   | 53    | 69,804 | 2.24E-64  |
| N90 - Other noninflammatory disorders of ...       | 0.08      | 0.03    | 0.19    | 0.0% | 1     | 62    | 5     | 70,220 | 7.84E-12  |
| N91 - Absent, scanty and rare ...                  | 0.12      | 0.08    | 0.19    | 0.0% | 5     | 168   | 20    | 70,095 | 8.11E-27  |
| N92 - Excessive, frequent and irregular ...        | 0.10      | 0.07    | 0.13    | 0.1% | 17    | 450   | 44    | 69,777 | 3.46E-74  |
| N93 - Other abnormal uterine and ...               | 0.24      | 0.19    | 0.31    | 0.1% | 21    | 306   | 74    | 69,887 | 2.15E-32  |
| N94 - Pain and other conditions ...                | 0.16      | 0.11    | 0.22    | 0.1% | 9     | 228   | 36    | 70,015 | 6.64E-32  |
| N95 - Menopausal and other perimenopausal ...      | 0.11      | 0.08    | 0.15    | 0.1% | 28    | 440   | 49    | 69,771 | 1.29E-69  |
| N97 - Female infertility                           | 0.06      | 0.02    | 0.19    | 0.0% | 0     | 48    | 3     | 70,237 | 7.22E-10  |
| N99 - Intraoperative and postprocedural comp. ...  | 0.31      | 0.19    | 0.50    | 0.0% | 10    | 71    | 22    | 70,185 | 6.45E-07  |
| O09 - Supervision of high risk ...                 | 0.18      | 0.13    | 0.25    | 0.1% | 106   | 201   | 36    | 69,945 | 1.69E-26  |
| O20 - Hemorrhage in early pregnancy                | 0.16      | 0.09    | 0.29    | 0.0% | 0     | 85    | 14    | 70,189 | 1.99E-12  |
| O26 - Maternal care for other ...                  | 0.48      | 0.37    | 0.60    | 0.1% | 71    | 208   | 99    | 69,910 | 7.10E-10  |
| O28 - Abnormal findings on antenatal ...           | 0.12      | 0.04    | 0.33    | 0.0% | 2     | 33    | 4     | 70,249 | 4.16E-06  |
| O35 - Maternal care for known ...                  | 0.24      | 0.15    | 0.36    | 0.0% | 11    | 110   | 26    | 70,141 | 1.10E-12  |
| Q44 - Congenital malformations of gallbladder, ... | 0.00      | 0.00    | 0.24    | 0.0% | 8     | 17    | 0     | 70,263 | 1.53E-05  |
| Q66 - Congenital deformities of feet               | 0.04      | 0.01    | 0.15    | 0.0% | 4     | 51    | 2     | 70,231 | 4.30E-11  |
| Q82 - Other congenital malformations of ...        | 0.09      | 0.04    | 0.23    | 0.0% | 3     | 53    | 5     | 70,227 | 6.77E-10  |
| Q84 - Other congenital malformations of ...        | 0.09      | 0.03    | 0.26    | 0.0% | 1     | 35    | 3     | 70,249 | 4.93E-07  |
| R01 - Cardiac murmurs and other ...                | 0.25      | 0.20    | 0.32    | 0.1% | 27    | 397   | 101   | 69,763 | 6.79E-40  |
| R03 - Abnormal blood-pressure reading, without ... | 0.54      | 0.48    | 0.61    | 0.6% | 57    | 800   | 433   | 68,998 | 1.94E-25  |
| R07 - Pain in throat & ...                         | 0.92      | 0.88    | 0.95    | 6.9% | 1,106 | 4,858 | 4,453 | 59,871 | 2.83E-05  |
| R10 - Abdominal and pelvic pain                    | 0.44      | 0.42    | 0.46    | 3.5% | 774   | 5,217 | 2,280 | 62,017 | 4.94E-252 |
| R12 - Heartburn                                    | 0.22      | 0.16    | 0.30    | 0.1% | 17    | 228   | 50    | 69,993 | 2.52E-26  |
| R13 - Aphagia and dysphagia                        | 0.82      | 0.78    | 0.87    | 3.5% | 1,851 | 2,756 | 2,272 | 63,409 | 9.65E-12  |
| R14 - Flatulence and related conditions            | 0.58      | 0.51    | 0.65    | 0.6% | 46    | 699   | 403   | 69,140 | 6.31E-19  |
| R15 - Fecal incontinence                           | 0.63      | 0.51    | 0.77    | 0.2% | 70    | 238   | 149   | 69,831 | 7.70E-06  |
| R16 - Hepatomegaly and splenomegaly, not ...       | 0.45      | 0.37    | 0.55    | 0.2% | 22    | 341   | 154   | 69,771 | 6.27E-17  |



| eTable 3 / Code                                   | OR (Est.) | OR (LI) | OR (UI) | Risk | A     | B     | C     | D      | P-value   |
|---------------------------------------------------|-----------|---------|---------|------|-------|-------|-------|--------|-----------|
| R18 - Ascites                                     | 0.61      | 0.51    | 0.74    | 0.3% | 116   | 309   | 190   | 69,673 | 1.27E-07  |
| R20 - Disturbances of skin sensation              | 0.20      | 0.17    | 0.23    | 0.3% | 34    | 977   | 192   | 69,085 | 2.32E-116 |
| R21 - Rash and other nonspecific ...              | 0.38      | 0.33    | 0.43    | 0.5% | 55    | 829   | 313   | 69,091 | 1.93E-52  |
| R22 - Localized swelling, mass and ...            | 0.32      | 0.28    | 0.35    | 0.6% | 55    | 1,242 | 393   | 68,598 | 1.19E-97  |
| R23 - Other skin changes                          | 0.38      | 0.32    | 0.45    | 0.3% | 48    | 481   | 184   | 69,575 | 1.69E-30  |
| R25 - Abnormal involuntary movements              | 0.30      | 0.25    | 0.35    | 0.3% | 72    | 674   | 199   | 69,343 | 6.45E-58  |
| R26 - Abnormalities of gait and ...               | 0.44      | 0.42    | 0.46    | 4.7% | 3,795 | 6,426 | 2,812 | 57,255 | 0.00E+00  |
| R27 - Other lack of coordination                  | 0.52      | 0.48    | 0.56    | 1.6% | 930   | 2,091 | 1,086 | 66,181 | 5.65E-71  |
| R29 - Other symptoms and signs ...                | 0.47      | 0.44    | 0.51    | 1.8% | 1,019 | 2,539 | 1,202 | 65,528 | 9.06E-106 |
| R30 - Pain associated with micturition            | 0.29      | 0.26    | 0.32    | 0.5% | 53    | 1,174 | 338   | 68,723 | 2.73E-102 |
| R31 - Hematuria                                   | 0.34      | 0.31    | 0.38    | 0.6% | 115   | 1,298 | 444   | 68,431 | 7.78E-93  |
| R32 - Unspecified urinary incontinence            | 0.34      | 0.30    | 0.38    | 0.6% | 426   | 1,116 | 382   | 68,364 | 5.48E-80  |
| R33 - Retention of urine                          | 0.57      | 0.52    | 0.62    | 1.0% | 430   | 1,238 | 703   | 67,917 | 8.20E-34  |
| R35 - Polyuria                                    | 0.17      | 0.15    | 0.20    | 0.3% | 93    | 1,392 | 240   | 68,563 | 1.49E-178 |
| R39 - Other and unspecified symptoms ...          | 0.25      | 0.21    | 0.28    | 0.4% | 195   | 1,051 | 258   | 68,784 | 3.20E-106 |
| R42 - Dizziness and giddiness                     | 0.47      | 0.44    | 0.51    | 1.5% | 205   | 2,139 | 1,003 | 66,941 | 3.66E-91  |
| R44 - Other symptoms and signs ...                | 0.40      | 0.32    | 0.50    | 0.2% | 58    | 267   | 106   | 69,857 | 1.19E-16  |
| R45 - Symptoms and signs involving ...            | 0.67      | 0.61    | 0.75    | 0.9% | 273   | 945   | 637   | 68,433 | 1.18E-14  |
| R46 - Symptoms and signs involving ...            | 0.51      | 0.39    | 0.65    | 0.1% | 19    | 177   | 90    | 70,002 | 1.42E-07  |
| R47 - Speech disturbances, not elsewhere ...      | 0.57      | 0.50    | 0.64    | 0.6% | 286   | 785   | 445   | 68,772 | 4.20E-22  |
| R48 - Dyslexia and other symbolic ...             | 0.35      | 0.29    | 0.42    | 0.2% | 249   | 444   | 157   | 69,438 | 1.90E-31  |
| R49 - Voice and resonance disorders               | 0.30      | 0.23    | 0.39    | 0.1% | 31    | 230   | 69    | 69,958 | 2.18E-20  |
| R51 - Headache                                    | 0.82      | 0.77    | 0.87    | 2.6% | 214   | 2,160 | 1,765 | 66,149 | 3.20E-10  |
| R52 - Pain, unspecified                           | 0.78      | 0.72    | 0.85    | 1.6% | 282   | 1,372 | 1,077 | 67,557 | 2.83E-09  |
| R55 - Syncope and collapse                        | 0.75      | 0.69    | 0.81    | 1.5% | 256   | 1,415 | 1,063 | 67,554 | 1.78E-12  |
| R56 - Convulsions, not elsewhere classified       | 0.53      | 0.48    | 0.59    | 0.8% | 398   | 1,081 | 575   | 68,234 | 2.32E-35  |
| R58 - Hemorrhage, not elsewhere classified        | 0.40      | 0.31    | 0.51    | 0.1% | 0     | 222   | 89    | 69,977 | 7.15E-14  |
| R59 - Enlarged lymph nodes                        | 0.46      | 0.39    | 0.54    | 0.3% | 36    | 477   | 220   | 69,555 | 3.11E-22  |
| R60 - Edema, not elsewhere classified             | 0.29      | 0.27    | 0.31    | 1.5% | 675   | 3,327 | 962   | 65,324 | 2.54E-285 |
| R63 - Symptoms and signs concerning ...           | 0.86      | 0.80    | 0.92    | 2.4% | 492   | 1,912 | 1,644 | 66,240 | 7.55E-06  |
| R69 - Illness, unspecified                        | 0.27      | 0.24    | 0.31    | 0.4% | 771   | 920   | 249   | 68,348 | 1.67E-85  |
| R70 - Elevated erythrocyte sedimentation rate ... | 0.44      | 0.31    | 0.63    | 0.1% | 4     | 98    | 43    | 70,143 | 5.43E-06  |
| R73 - Elevated blood glucose level                | 0.39      | 0.37    | 0.42    | 1.7% | 347   | 2,876 | 1,127 | 65,938 | 5.14E-168 |
| R76 - Other abnormal immunological findings ...   | 0.44      | 0.36    | 0.54    | 0.2% | 34    | 327   | 145   | 69,782 | 8.00E-17  |
| R80 - Proteinuria                                 | 0.26      | 0.22    | 0.31    | 0.2% | 72    | 627   | 166   | 69,423 | 5.56E-60  |
| R82 - Other and unspecified abnormal ...          | 0.40      | 0.34    | 0.46    | 0.3% | 21    | 575   | 228   | 69,464 | 2.75E-34  |
| R87 - Abnormal findings in specimens ...          | 0.07      | 0.04    | 0.11    | 0.0% | 6     | 221   | 15    | 70,046 | 1.28E-40  |
| R89 - Abnormal findings in specimens ...          | 0.34      | 0.23    | 0.49    | 0.0% | 8     | 104   | 35    | 70,141 | 8.04E-09  |
| R90 - Abnormal findings on diagnostic ...         | 0.47      | 0.38    | 0.60    | 0.2% | 10    | 226   | 107   | 69,945 | 1.00E-10  |
| R92 - Abnormal and inconclusive findings ...      | 0.04      | 0.03    | 0.06    | 0.0% | 9     | 577   | 25    | 69,677 | 1.09E-111 |
| R93 - Abnormal findings on diagnostic ...         | 0.58      | 0.52    | 0.64    | 0.9% | 50    | 1,047 | 605   | 68,586 | 1.99E-27  |
| R97 - Abnormal tumor markers                      | 0.10      | 0.08    | 0.13    | 0.1% | 39    | 600   | 60    | 69,589 | 9.88E-98  |
| S00 - Superficial injury of head                  | 0.32      | 0.28    | 0.38    | 0.3% | 20    | 599   | 194   | 69,475 | 1.12E-46  |
| S01 - Open wound of head                          | 0.44      | 0.37    | 0.52    | 0.3% | 29    | 448   | 198   | 69,613 | 1.16E-22  |
| S02 - Fracture of skull and ...                   | 0.50      | 0.38    | 0.67    | 0.1% | 30    | 137   | 69    | 70,052 | 3.04E-06  |
| S05 - Injury of eye and ...                       | 0.22      | 0.15    | 0.33    | 0.0% | 4     | 134   | 30    | 70,120 | 8.77E-16  |
| S06 - Intracranial injury                         | 0.51      | 0.43    | 0.60    | 0.3% | 145   | 384   | 195   | 69,564 | 5.58E-15  |
| S09 - Other and unspecified injuries ...          | 0.45      | 0.41    | 0.50    | 0.8% | 68    | 1,259 | 569   | 68,392 | 2.00E-58  |
| S12 - Fracture of cervical vertebra ...           | 0.41      | 0.28    | 0.62    | 0.0% | 26    | 82    | 34    | 70,146 | 1.28E-05  |
| S13 - Dislocation and sprain of ...               | 0.08      | 0.04    | 0.15    | 0.0% | 5     | 126   | 10    | 70,147 | 6.13E-23  |
| S14 - Injury of nerves and ...                    | 0.30      | 0.17    | 0.53    | 0.0% | 16    | 50    | 15    | 70,207 | 2.47E-05  |

| eTable 3 / Code                           | OR (Est.) | OR (LI) | OR (UI) | Risk | A   | B   | C   | D      | P-value  |
|-------------------------------------------|-----------|---------|---------|------|-----|-----|-----|--------|----------|
| S16 - Injury of muscle, fascia ...        | 0.16      | 0.10    | 0.24    | 0.0% | 5   | 160 | 25  | 70,098 | 6.73E-23 |
| S19 - Other specified and unspecified ... | 0.38      | 0.31    | 0.46    | 0.2% | 5   | 383 | 145 | 69,755 | 6.08E-25 |
| S20 - Superficial injury of thorax        | 0.20      | 0.14    | 0.30    | 0.0% | 4   | 147 | 30  | 70,107 | 2.80E-18 |
| S21 - Open wound of thorax                | 0.32      | 0.19    | 0.53    | 0.0% | 13  | 60  | 19  | 70,196 | 6.78E-06 |
| S22 - Fracture of rib(s), sternum ...     | 0.44      | 0.37    | 0.52    | 0.3% | 125 | 411 | 180 | 69,572 | 3.05E-21 |
| S23 - Dislocation and sprain of ...       | 0.14      | 0.07    | 0.28    | 0.0% | 3   | 58  | 8   | 70,219 | 1.62E-09 |
| S29 - Other and unspecified injuries ...  | 0.37      | 0.30    | 0.45    | 0.2% | 7   | 379 | 139 | 69,763 | 8.54E-26 |
| S30 - Superficial injury of abdomen, ...  | 0.41      | 0.32    | 0.52    | 0.1% | 6   | 215 | 88  | 69,979 | 4.54E-13 |
| S31 - Open wound of abdomen, ...          | 0.51      | 0.41    | 0.62    | 0.2% | 52  | 278 | 141 | 69,817 | 3.05E-11 |
| S32 - Fracture of lumbar spine ...        | 0.42      | 0.34    | 0.50    | 0.2% | 154 | 356 | 148 | 69,630 | 2.96E-20 |
| S33 - Dislocation and sprain of ...       | 0.05      | 0.02    | 0.10    | 0.0% | 6   | 168 | 8   | 70,106 | 4.25E-33 |
| S39 - Other and unspecified injuries ...  | 0.29      | 0.24    | 0.34    | 0.2% | 11  | 526 | 151 | 69,600 | 7.54E-47 |
| S40 - Superficial injury of shoulder ...  | 0.36      | 0.26    | 0.49    | 0.1% | 6   | 142 | 51  | 70,089 | 9.27E-11 |
| S41 - Open wound of shoulder ...          | 0.21      | 0.13    | 0.35    | 0.0% | 7   | 89  | 19  | 70,173 | 3.15E-11 |
| S42 - Fracture of shoulder and ...        | 0.40      | 0.32    | 0.50    | 0.1% | 113 | 258 | 103 | 69,814 | 5.26E-16 |
| S43 - Dislocation and sprain of ...       | 0.12      | 0.08    | 0.19    | 0.0% | 11  | 166 | 20  | 70,091 | 2.12E-26 |
| S46 - Injury of muscle, fascia ...        | 0.09      | 0.06    | 0.14    | 0.0% | 12  | 219 | 20  | 70,037 | 1.49E-37 |
| S49 - Other and unspecified injuries ...  | 0.25      | 0.18    | 0.35    | 0.1% | 2   | 168 | 42  | 70,076 | 6.36E-18 |
| S50 - Superficial injury of elbow ...     | 0.31      | 0.22    | 0.44    | 0.1% | 4   | 140 | 44  | 70,100 | 2.50E-12 |
| S51 - Open wound of elbow ...             | 0.43      | 0.32    | 0.59    | 0.1% | 10  | 136 | 59  | 70,083 | 5.25E-08 |
| S52 - Fracture of forearm                 | 0.25      | 0.18    | 0.36    | 0.1% | 35  | 161 | 41  | 70,051 | 5.63E-17 |
| S53 - Dislocation and sprain of ...       | 0.05      | 0.00    | 0.28    | 0.0% | 1   | 22  | 1   | 70,264 | 5.72E-06 |
| S59 - Other and unspecified injuries ...  | 0.29      | 0.18    | 0.45    | 0.0% | 2   | 83  | 24  | 70,179 | 2.06E-08 |
| S60 - Superficial injury of wrist, ...    | 0.23      | 0.16    | 0.32    | 0.1% | 5   | 189 | 43  | 70,051 | 1.74E-21 |
| S61 - Open wound of wrist, ...            | 0.17      | 0.12    | 0.24    | 0.1% | 6   | 235 | 40  | 70,007 | 1.30E-31 |
| S62 - Fracture at wrist and ...           | 0.33      | 0.24    | 0.44    | 0.1% | 25  | 181 | 59  | 70,023 | 5.70E-15 |
| S63 - Dislocation and sprain of ...       | 0.13      | 0.08    | 0.22    | 0.0% | 6   | 122 | 16  | 70,144 | 3.96E-19 |
| S69 - Other and unspecified injuries ...  | 0.19      | 0.13    | 0.28    | 0.0% | 1   | 152 | 29  | 70,106 | 1.21E-19 |
| S70 - Superficial injury of hip ...       | 0.28      | 0.21    | 0.39    | 0.1% | 4   | 165 | 47  | 70,072 | 9.31E-16 |
| S72 - Fracture of femur                   | 0.46      | 0.40    | 0.53    | 0.4% | 357 | 630 | 291 | 69,010 | 8.24E-29 |
| S76 - Injury of muscle, fascia ...        | 0.13      | 0.07    | 0.24    | 0.0% | 2   | 79  | 10  | 70,197 | 5.68E-13 |
| S79 - Other and unspecified injuries ...  | 0.31      | 0.24    | 0.40    | 0.1% | 2   | 235 | 73  | 69,978 | 4.57E-20 |
| S80 - Superficial injury of knee ...      | 0.26      | 0.21    | 0.33    | 0.1% | 25  | 390 | 103 | 69,770 | 5.77E-38 |
| S81 - Open wound of knee ...              | 0.31      | 0.25    | 0.37    | 0.2% | 65  | 434 | 134 | 69,655 | 4.19E-36 |
| S82 - Fracture of lower leg, ...          | 0.33      | 0.27    | 0.41    | 0.2% | 145 | 338 | 111 | 69,694 | 1.47E-26 |
| S83 - Dislocation and sprain of ...       | 0.08      | 0.05    | 0.13    | 0.0% | 20  | 269 | 22  | 69,977 | 3.83E-47 |
| S86 - Injury of muscle, fascia ...        | 0.10      | 0.05    | 0.21    | 0.0% | 1   | 79  | 8   | 70,200 | 6.15E-14 |
| S88 - Traumatic amputation of lower ...   | 0.23      | 0.15    | 0.37    | 0.0% | 21  | 95  | 22  | 70,150 | 2.81E-11 |
| S89 - Other and unspecified injuries ...  | 0.16      | 0.11    | 0.21    | 0.1% | 4   | 281 | 44  | 69,959 | 3.71E-39 |
| S90 - Superficial injury of ankle, ...    | 0.18      | 0.14    | 0.24    | 0.1% | 15  | 285 | 52  | 69,936 | 1.31E-36 |
| S91 - Open wound of ankle, ...            | 0.26      | 0.21    | 0.32    | 0.2% | 65  | 434 | 113 | 69,676 | 1.30E-42 |
| S92 - Fracture of foot and ...            | 0.20      | 0.14    | 0.28    | 0.1% | 25  | 203 | 41  | 70,019 | 6.55E-25 |
| S93 - Dislocation and sprain of ...       | 0.10      | 0.07    | 0.15    | 0.0% | 8   | 280 | 29  | 69,971 | 6.69E-46 |
| S98 - Traumatic amputation of ankle ...   | 0.22      | 0.13    | 0.37    | 0.0% | 23  | 78  | 17  | 70,170 | 7.47E-10 |
| S99 - Other and unspecified injuries ...  | 0.27      | 0.20    | 0.37    | 0.1% | 3   | 173 | 47  | 70,065 | 3.53E-17 |
| T14 - Injury of unspecified body ...      | 0.49      | 0.43    | 0.55    | 0.6% | 57  | 795 | 390 | 69,046 | 8.33E-32 |
| T15 - Foreign body on external ...        | 0.00      | 0.00    | 0.23    | 0.0% | 0   | 18  | 0   | 70,270 | 7.63E-06 |
| T16 - Foreign body in ear                 | 0.03      | 0.01    | 0.18    | 0.0% | 0   | 33  | 1   | 70,254 | 1.06E-07 |
| T18 - Foreign body in alimentary ...      | 0.16      | 0.08    | 0.32    | 0.0% | 6   | 56  | 9   | 70,217 | 1.16E-08 |
| T45 - Poisoning by, adverse effect ...    | 0.55      | 0.43    | 0.68    | 0.2% | 25  | 211 | 115 | 69,937 | 1.43E-07 |
| T74 - Adult and child abuse, ...          | 0.16      | 0.07    | 0.37    | 0.0% | 3   | 37  | 6   | 70,242 | 4.76E-06 |

| eTable 3 / Code                                     | OR (Est.) | OR (LI) | OR (UI) | Risk | A     | B     | C     | D      | P-value  |
|-----------------------------------------------------|-----------|---------|---------|------|-------|-------|-------|--------|----------|
| T78 - Adverse effects, not elsewhere ...            | 0.37      | 0.30    | 0.46    | 0.2% | 31    | 327   | 122   | 69,808 | 6.13E-22 |
| T81 - Complications of procedures, not ...          | 0.40      | 0.34    | 0.47    | 0.3% | 90    | 449   | 179   | 69,570 | 7.03E-27 |
| T82 - Complications of cardiac and ...              | 0.31      | 0.27    | 0.35    | 0.4% | 138   | 877   | 271   | 69,002 | 2.60E-71 |
| T83 - Complications of genitourinary prosthetic ... | 0.53      | 0.44    | 0.64    | 0.2% | 56    | 309   | 164   | 69,759 | 3.56E-11 |
| T84 - Complications of internal orthopedic ...      | 0.33      | 0.25    | 0.44    | 0.1% | 50    | 191   | 63    | 69,984 | 1.60E-15 |
| T85 - Complications of other internal ...           | 0.60      | 0.48    | 0.76    | 0.2% | 18    | 190   | 114   | 69,966 | 1.70E-05 |
| T87 - Complications peculiar to reattachment ...    | 0.31      | 0.21    | 0.46    | 0.0% | 19    | 103   | 32    | 70,134 | 1.69E-09 |
| T88 - Other complications of surgical ...           | 0.39      | 0.25    | 0.60    | 0.0% | 3     | 72    | 28    | 70,185 | 1.71E-05 |
| W00 - Fall due to ice ...                           | 0.04      | 0.01    | 0.21    | 0.0% | 2     | 28    | 1     | 70,257 | 1.38E-06 |
| W01 - Fall on same level ...                        | 0.31      | 0.25    | 0.39    | 0.2% | 14    | 340   | 106   | 69,828 | 2.65E-28 |
| W05 - Fall from non-moving wheelchair, ...          | 0.22      | 0.12    | 0.41    | 0.0% | 0     | 54    | 12    | 70,222 | 4.49E-07 |
| W10 - Fall on and from ...                          | 0.15      | 0.08    | 0.28    | 0.0% | 4     | 73    | 11    | 70,200 | 2.82E-11 |
| W18 - Other slipping, tripping and ...              | 0.40      | 0.33    | 0.49    | 0.2% | 11    | 331   | 132   | 69,814 | 3.52E-20 |
| W19 - Unspecified fall                              | 0.47      | 0.43    | 0.52    | 1.0% | 178   | 1,497 | 707   | 67,906 | 2.20E-63 |
| W22 - Striking against or struck ...                | 0.15      | 0.08    | 0.28    | 0.0% | 0     | 73    | 11    | 70,204 | 2.82E-11 |
| W54 - Contact with dog                              | 0.04      | 0.01    | 0.22    | 0.0% | 1     | 26    | 1     | 70,260 | 3.86E-06 |
| X32 - Exposure to sunlight                          | 0.07      | 0.02    | 0.28    | 0.0% | 0     | 27    | 2     | 70,259 | 8.32E-06 |
| X50 - Overexertion and strenuous or ...             | 0.09      | 0.05    | 0.19    | 0.0% | 0     | 87    | 8     | 70,193 | 1.22E-15 |
| X58 - Exposure to other specified ...               | 0.30      | 0.23    | 0.38    | 0.1% | 1     | 271   | 80    | 69,936 | 3.62E-24 |
| Y83 - Surgical operation and other ...              | 0.47      | 0.34    | 0.66    | 0.1% | 5     | 112   | 53    | 70,118 | 6.32E-06 |
| Y90 - Evidence of alcohol involvement ...           | 0.24      | 0.13    | 0.47    | 0.0% | 6     | 45    | 11    | 70,226 | 1.03E-05 |
| Y92 - Place of occurrence of ...                    | 0.44      | 0.38    | 0.51    | 0.3% | 16    | 526   | 231   | 69,515 | 1.19E-26 |
| Y93 - Activity codes                                | 0.28      | 0.21    | 0.37    | 0.1% | 3     | 218   | 60    | 70,007 | 4.68E-21 |
| Y99 - External cause status                         | 0.33      | 0.23    | 0.48    | 0.1% | 2     | 114   | 38    | 70,134 | 1.18E-09 |
| Z00 - Encounter for general examination ...         | 0.11      | 0.10    | 0.12    | 1.2% | 249   | 6,495 | 732   | 62,812 | 0.00E+00 |
| Z01 - Encounter for other special ...               | 0.10      | 0.10    | 0.12    | 0.7% | 108   | 4,128 | 433   | 65,619 | 0.00E+00 |
| Z02 - Encounter for administrative examination      | 0.31      | 0.26    | 0.37    | 0.2% | 102   | 489   | 150   | 69,547 | 8.92E-41 |
| Z03 - Observation for conditions ruled ...          | 0.54      | 0.47    | 0.63    | 0.4% | 22    | 469   | 255   | 69,542 | 2.45E-15 |
| Z04 - Encounter for examination and ...             | 0.52      | 0.45    | 0.59    | 0.5% | 53    | 685   | 353   | 69,197 | 9.25E-25 |
| Z08 - Encounter for follow-up examination ...       | 0.07      | 0.04    | 0.12    | 0.0% | 2     | 198   | 14    | 70,074 | 3.15E-36 |
| Z11 - Encounter for screening for ...               | 0.58      | 0.54    | 0.63    | 1.5% | 79    | 1,725 | 1,007 | 67,477 | 7.96E-43 |
| Z12 - Encounter for screening for ...               | 0.04      | 0.04    | 0.05    | 0.3% | 56    | 4,581 | 197   | 65,454 | 0.00E+00 |
| Z13 - Encounter for screening for ...               | 0.23      | 0.21    | 0.24    | 1.1% | 168   | 3,395 | 767   | 65,958 | 0.00E+00 |
| Z17 - Estrogen receptor status                      | 0.17      | 0.11    | 0.26    | 0.0% | 41    | 142   | 24    | 70,081 | 1.08E-19 |
| Z23 - Encounter for immunization                    | 0.09      | 0.08    | 0.10    | 0.5% | 385   | 3,829 | 344   | 65,730 | 0.00E+00 |
| Z28 - Immunization not carried out ...              | 0.23      | 0.17    | 0.31    | 0.1% | 8     | 246   | 57    | 69,977 | 3.43E-27 |
| Z30 - Encounter for contraceptive management        | 0.11      | 0.09    | 0.15    | 0.1% | 43    | 598   | 68    | 69,579 | 2.23E-93 |
| Z31 - Encounter for procreative management          | 0.04      | 0.02    | 0.11    | 0.0% | 2     | 92    | 4     | 70,190 | 6.72E-19 |
| Z32 - Encounter for pregnancy test ...              | 0.11      | 0.08    | 0.16    | 0.1% | 19    | 376   | 43    | 69,850 | 3.69E-59 |
| Z33 - Pregnant state                                | 0.38      | 0.27    | 0.54    | 0.1% | 9     | 112   | 43    | 70,124 | 4.71E-08 |
| Z34 - Encounter for supervision of ...              | 0.15      | 0.11    | 0.21    | 0.1% | 174   | 320   | 49    | 69,745 | 7.11E-45 |
| Z36 - Encounter for antenatal screening ...         | 0.11      | 0.08    | 0.16    | 0.0% | 41    | 295   | 33    | 69,919 | 4.39E-47 |
| Z3A - Weeks of gestation                            | 0.59      | 0.48    | 0.72    | 0.2% | 396   | 247   | 145   | 69,500 | 3.37E-07 |
| Z43 - Encounter for attention to ...                | 0.71      | 0.61    | 0.82    | 0.4% | 179   | 423   | 301   | 69,385 | 6.89E-06 |
| Z47 - Orthopedic aftercare                          | 0.27      | 0.24    | 0.32    | 0.3% | 199   | 778   | 213   | 69,098 | 8.84E-72 |
| Z48 - Encounter for other postprocedural ...        | 0.33      | 0.29    | 0.38    | 0.5% | 157   | 992   | 330   | 68,809 | 7.48E-74 |
| Z53 - Persons encountering health services ...      | 0.39      | 0.31    | 0.48    | 0.2% | 10    | 284   | 110   | 69,884 | 2.89E-18 |
| Z59 - Problems related to housing ...               | 0.41      | 0.34    | 0.49    | 0.2% | 114   | 388   | 158   | 69,628 | 1.12E-22 |
| Z63 - Other problems related to ...                 | 0.50      | 0.37    | 0.67    | 0.1% | 15    | 123   | 61    | 70,089 | 6.89E-06 |
| Z68 - Body mass index [BMI]                         | 0.24      | 0.23    | 0.25    | 3.6% | 1,892 | 8,954 | 2,149 | 57,293 | 0.00E+00 |
| Z70 - Counseling related to sexual ...              | 0.05      | 0.01    | 0.19    | 0.0% | 3     | 39    | 2     | 70,244 | 1.88E-08 |



| eTable 3 / Code                                | OR (Est.) | OR (LI) | OR (UI) | Risk | A     | B     | C     | D      | P-value   |
|------------------------------------------------|-----------|---------|---------|------|-------|-------|-------|--------|-----------|
| Z71 - Persons encountering health services ... | 0.80      | 0.75    | 0.85    | 2.8% | 363   | 2,346 | 1,873 | 65,706 | 3.68E-13  |
| Z72 - Problems related to lifestyle            | 0.34      | 0.29    | 0.39    | 0.4% | 106   | 734   | 247   | 69,201 | 2.67E-54  |
| Z73 - Problems related to life ...             | 0.39      | 0.31    | 0.50    | 0.1% | 94    | 240   | 94    | 69,860 | 2.12E-15  |
| Z76 - Persons encountering health services ... | 0.42      | 0.37    | 0.47    | 0.6% | 133   | 943   | 396   | 68,816 | 2.40E-50  |
| Z79 - Long term (current) drug ...             | 0.61      | 0.59    | 0.64    | 8.8% | 4,195 | 8,241 | 5,064 | 52,788 | 6.84E-167 |
| Z80 - Family history of primary ...            | 0.23      | 0.19    | 0.27    | 0.2% | 32    | 639   | 145   | 69,472 | 2.17E-69  |
| Z81 - Family history of mental ...             | 0.40      | 0.27    | 0.61    | 0.0% | 4     | 77    | 31    | 70,176 | 1.49E-05  |
| Z82 - Family history of certain ...            | 0.65      | 0.58    | 0.73    | 0.6% | 51    | 665   | 432   | 69,140 | 2.48E-12  |
| Z83 - Family history of other ...              | 0.50      | 0.42    | 0.59    | 0.3% | 22    | 414   | 205   | 69,647 | 6.26E-17  |
| Z85 - Personal history of malignant ...        | 0.63      | 0.58    | 0.68    | 1.5% | 546   | 1,619 | 1,013 | 67,110 | 4.26E-32  |
| Z86 - Personal history of certain ...          | 0.76      | 0.72    | 0.80    | 3.8% | 1,173 | 3,333 | 2,532 | 63,250 | 1.53E-25  |
| Z87 - Personal history of other ...            | 0.75      | 0.72    | 0.79    | 4.5% | 1,258 | 3,879 | 2,921 | 62,230 | 3.87E-31  |
| Z88 - Allergy status to drugs, ...             | 0.79      | 0.73    | 0.86    | 1.5% | 310   | 1,300 | 1,033 | 67,645 | 3.65E-08  |
| Z89 - Acquired absence of limb                 | 0.37      | 0.32    | 0.44    | 0.3% | 377   | 536   | 199   | 69,176 | 2.83E-35  |
| Z90 - Acquired absence of organs, ...          | 0.68      | 0.62    | 0.74    | 1.2% | 268   | 1,210 | 823   | 67,987 | 1.12E-17  |
| Z91 - Personal risk factors, not ...           | 0.55      | 0.52    | 0.58    | 2.9% | 1,100 | 3,423 | 1,876 | 63,889 | 4.26E-100 |
| Z93 - Artificial opening status                | 0.70      | 0.62    | 0.80    | 0.6% | 393   | 562   | 394   | 68,939 | 6.62E-08  |
| Z94 - Transplanted organ and tissue ...        | 0.59      | 0.47    | 0.73    | 0.2% | 411   | 220   | 129   | 69,528 | 1.45E-06  |
| Z95 - Presence of cardiac and ...              | 0.68      | 0.64    | 0.73    | 2.0% | 1,269 | 1,966 | 1,341 | 65,712 | 1.97E-27  |
| Z96 - Presence of other functional ...         | 0.32      | 0.29    | 0.35    | 1.0% | 423   | 2,078 | 668   | 67,119 | 3.02E-159 |
| Z98 - Other postprocedural states              | 0.36      | 0.33    | 0.39    | 1.1% | 299   | 2,063 | 748   | 67,178 | 1.35E-135 |

**eTable 4. Candidate COVID-19 complications: codes identified in the primary analysis, examined at the individual code level**

This table shows findings for individual-level codes, selected from among the 69 candidate ICD-10 complications identified when analyzed at the code header level. Only codes with a p-value < 0.05 and OR > 1 are shown. OR (Est.): odds ratio for association with COVID-19, point estimate. OR (LI) and OR (UI): 95% lower and upper confidence intervals for the odds ratio. Risk, A, B, C, and D are defined in eFigure 3. P-value: p-value from McNemar test (null hypothesis: OR = 1).

| eTable 4 / Code                                              | OR (Est.) | OR (LI) | OR (UI) | Risk | A     | B     | C     | D      | P-value   |
|--------------------------------------------------------------|-----------|---------|---------|------|-------|-------|-------|--------|-----------|
| A4189 - Other specified sepsis                               | 15.44     | 13.25   | 17.99   | 3.9% | 33    | 175   | 2,702 | 67,378 | 0.00E+00  |
| A419 - Sepsis, unspecified organism                          | 3.41      | 3.23    | 3.61    | 8.0% | 560   | 1,595 | 5,446 | 62,687 | 0.00E+00  |
| B3324 - Viral cardiomyopathy                                 | 16.00     | 2.49    | 670.96  | 0.0% | 0     | 1     | 16    | 70,271 | 2.75E-04  |
| B338 - Other specified viral diseases                        | 11.54     | 6.60    | 20.19   | 0.2% | 3     | 13    | 150   | 70,122 | 1.70E-26  |
| B340 - Adenovirus infection, unspecified                     | 2.42      | 1.25    | 4.68    | 0.0% | 0     | 12    | 29    | 70,247 | 1.25E-02  |
| B341 - Enterovirus infection, unspecified                    | 2.83      | 1.07    | 8.78    | 0.0% | 2     | 6     | 17    | 70,263 | 3.47E-02  |
| B342 - Coronavirus infection, unspecified                    | 57.20     | 45.19   | 72.41   | 5.7% | 21    | 70    | 4,004 | 66,193 | 0.00E+00  |
| B348 - Other viral infections of unspecified site            | 1.73      | 1.28    | 2.34    | 0.2% | 12    | 66    | 114   | 70,096 | 4.60E-04  |
| B349 - Viral infection, unspecified                          | 4.16      | 3.83    | 4.52    | 4.2% | 72    | 699   | 2,910 | 66,607 | 2.94E-296 |
| B960 - Mycoplasma pneumoniae [M. pneumoniae] ...             | 3.25      | 1.00    | 13.68   | 0.0% | 0     | 4     | 13    | 70,271 | 4.90E-02  |
| B9689 - Other specified bacterial agents ...                 | 1.80      | 1.61    | 2.01    | 1.2% | 37    | 482   | 868   | 68,901 | 1.09E-25  |
| B999 - Unspecified infectious disease                        | 3.02      | 2.48    | 3.69    | 0.6% | 10    | 129   | 390   | 69,759 | 3.61E-30  |
| D61818 - Other pancytopenia                                  | 1.63      | 1.38    | 1.93    | 0.5% | 89    | 214   | 349   | 69,636 | 1.63E-08  |
| D65 - Disseminated intravascular coagulation                 | 11.83     | 5.26    | 26.62   | 0.1% | 0     | 6     | 71    | 70,211 | 3.02E-13  |
| D6959 - Other secondary thrombocytopenia                     | 1.65      | 1.25    | 2.19    | 0.2% | 14    | 78    | 129   | 70,067 | 5.10E-04  |
| D696 - Thrombocytopenia, unspecified                         | 1.75      | 1.60    | 1.92    | 1.8% | 250   | 710   | 1,244 | 68,084 | 1.77E-33  |
| D72810 - Lymphocytopenia                                     | 49.75     | 30.48   | 81.21   | 1.1% | 2     | 16    | 796   | 69,474 | 1.52E-164 |
| D72819 - Decreased white blood cell count, unspecified       | 3.08      | 2.60    | 3.65    | 0.8% | 23    | 174   | 536   | 69,555 | 8.13E-42  |
| D72825 - Bandemia                                            | 2.46      | 1.57    | 3.87    | 0.1% | 2     | 26    | 64    | 70,196 | 9.61E-05  |
| E43 - Unspecified severe malnutrition                        | 2.11      | 1.86    | 2.38    | 1.1% | 188   | 374   | 788   | 68,938 | 8.73E-34  |
| E46 - Unspecified malnutrition                               | 1.32      | 1.18    | 1.48    | 1.0% | 219   | 523   | 691   | 68,855 | 1.64E-06  |
| G7281 - Critical illness myopathy                            | 5.00      | 3.71    | 6.75    | 0.4% | 11    | 51    | 255   | 69,971 | 3.90E-31  |
| G92 - Toxic encephalopathy                                   | 1.73      | 1.51    | 1.98    | 0.8% | 42    | 338   | 585   | 69,323 | 5.62E-16  |
| G931 - Anoxic brain damage, not elsewhere classified         | 2.14      | 1.59    | 2.89    | 0.2% | 38    | 63    | 135   | 70,052 | 4.52E-07  |
| G933 - Postviral fatigue syndrome                            | 3.19      | 2.06    | 4.94    | 0.1% | 2     | 26    | 83    | 70,177 | 8.15E-08  |
| G9340 - Encephalopathy, unspecified                          | 1.81      | 1.65    | 1.97    | 2.0% | 256   | 785   | 1,417 | 67,830 | 3.21E-41  |
| G9341 - Metabolic encephalopathy                             | 2.32      | 2.14    | 2.52    | 2.8% | 304   | 826   | 1,915 | 67,243 | 6.38E-96  |
| G9349 - Other encephalopathy                                 | 1.69      | 1.38    | 2.07    | 0.4% | 22    | 147   | 248   | 69,871 | 4.87E-07  |
| G9382 - Brain death                                          | Inf       |         |         | 0.0% | 0     | 0     | 8     | 70,280 | 7.81E-03  |
| I2119 - ST elevation (STEMI) myocardial infarction ...       | 2.13      | 1.39    | 3.25    | 0.1% | 4     | 31    | 66    | 70,187 | 5.56E-04  |
| I214 - Non-ST elevation (NSTEMI) myocardial infarction       | 1.48      | 1.33    | 1.65    | 1.2% | 158   | 543   | 804   | 68,783 | 1.40E-12  |
| I21A1 - Myocardial infarction type 2                         | 2.68      | 2.19    | 3.27    | 0.5% | 18    | 130   | 348   | 69,792 | 3.23E-23  |
| I248 - Other forms of acute ischemic heart disease           | 2.43      | 2.01    | 2.93    | 0.5% | 18    | 150   | 364   | 69,756 | 5.72E-21  |
| I2699 - Other pulmonary embolism without acute cor pulmonale | 1.64      | 1.45    | 1.86    | 0.9% | 178   | 401   | 659   | 69,050 | 2.93E-15  |
| I400 - Infective myocarditis                                 | 36.00     | 6.23    | 207.90  | 0.1% | 0     | 1     | 36    | 70,251 | 2.28E-08  |
| I4519 - Other right bundle-branch block                      | 1.64      | 1.14    | 2.35    | 0.1% | 2     | 47    | 77    | 70,162 | 9.21E-03  |
| I454 - Nonspecific intraventricular block                    | 2.22      | 1.36    | 3.61    | 0.1% | 10    | 23    | 51    | 70,204 | 1.70E-03  |
| I4581 - Long QT syndrome                                     | 2.49      | 2.06    | 3.01    | 0.5% | 18    | 150   | 374   | 69,746 | 2.00E-22  |
| I462 - Cardiac arrest due to underlying cardiac condition    | 2.33      | 1.20    | 4.53    | 0.0% | 1     | 12    | 28    | 70,247 | 1.77E-02  |
| I468 - Cardiac arrest due to other underlying condition      | 6.00      | 3.43    | 10.49   | 0.1% | 0     | 14    | 84    | 70,190 | 3.17E-12  |
| I469 - Cardiac arrest, cause unspecified                     | 10.20     | 7.97    | 13.06   | 1.0% | 26    | 69    | 704   | 69,489 | 4.24E-115 |
| I4891 - Unspecified atrial fibrillation                      | 1.09      | 1.03    | 1.16    | 3.7% | 1,986 | 2,245 | 2,458 | 63,599 | 1.99E-03  |
| I9589 - Other hypotension                                    | 1.55      | 1.26    | 1.91    | 0.3% | 27    | 145   | 225   | 69,891 | 4.01E-05  |
| I959 - Hypotension, unspecified                              | 2.04      | 1.90    | 2.20    | 3.2% | 255   | 1,065 | 2,177 | 66,791 | 8.64E-85  |

| eTable 4 / Code                                                | OR (Est.) | OR (LI) | OR (UI) | Risk  | A     | B     | C      | D      | P-value   |
|----------------------------------------------------------------|-----------|---------|---------|-------|-------|-------|--------|--------|-----------|
| J069 - Acute upper respiratory infection, unspecified          | 1.30      | 1.24    | 1.36    | 5.9%  | 433   | 3,048 | 3,959  | 62,848 | 1.58E-27  |
| J120 - Adenoviral pneumonia                                    | 7.50      | 1.74    | 67.59   | 0.0%  | 1     | 2     | 15     | 70,270 | 2.35E-03  |
| J1281 - Pneumonia due to SARS-associated coronavirus           | 499.67    | 169.76  | 1470.67 | 2.1%  | 1     | 3     | 1,499  | 68,785 | 0.00E+00  |
| J1289 - Other viral pneumonia                                  | 766.74    | 510.81  | 1150.90 | 25.1% | 20    | 23    | 17,635 | 52,610 | 0.00E+00  |
| J129 - Viral pneumonia, unspecified                            | 44.36     | 34.06   | 57.76   | 3.5%  | 10    | 56    | 2,484  | 67,738 | 0.00E+00  |
| J150 - Pneumonia due to Klebsiella pneumoniae                  | 2.45      | 1.50    | 4.01    | 0.1%  | 5     | 22    | 54     | 70,207 | 3.77E-04  |
| J151 - Pneumonia due to Pseudomonas                            | 2.86      | 1.88    | 4.35    | 0.1%  | 7     | 29    | 83     | 70,169 | 5.50E-07  |
| J1520 - Pneumonia due to staphylococcus, unspecified           | 5.00      | 1.41    | 26.94   | 0.0%  | 1     | 3     | 15     | 70,269 | 7.54E-03  |
| J15211 - Pneumonia due to Methicillin susceptible S. aureus    | 3.35      | 2.04    | 5.49    | 0.1%  | 0     | 20    | 67     | 70,201 | 8.15E-07  |
| J15212 - Pneumonia due to Methicillin resistant S. aureus      | 4.03      | 2.69    | 6.04    | 0.2%  | 7     | 29    | 117    | 70,135 | 6.01E-13  |
| J156 - Pneumonia due to other Gram-negative bacteria           | 2.24      | 1.65    | 3.05    | 0.2%  | 5     | 58    | 130    | 70,095 | 2.24E-07  |
| J157 - Pneumonia due to Mycoplasma pneumoniae                  | 2.33      | 1.35    | 4.03    | 0.1%  | 1     | 18    | 42     | 70,227 | 2.98E-03  |
| J158 - Pneumonia due to other specified bacteria               | 1.95      | 1.41    | 2.69    | 0.2%  | 8     | 55    | 107    | 70,118 | 6.15E-05  |
| J159 - Unspecified bacterial pneumonia                         | 4.13      | 3.54    | 4.82    | 1.2%  | 30    | 198   | 818    | 69,242 | 5.25E-84  |
| J168 - Pneumonia due to other specified infectious organisms   | 6.40      | 4.72    | 8.66    | 0.4%  | 10    | 48    | 307    | 69,923 | 1.11E-42  |
| J17 - Pneumonia in diseases, CE                                | 3.83      | 2.05    | 7.16    | 0.1%  | 5     | 12    | 46     | 70,225 | 1.47E-05  |
| J180 - Bronchopneumonia, unspecified organism                  | 2.19      | 1.68    | 2.86    | 0.2%  | 11    | 79    | 173    | 70,025 | 4.67E-09  |
| J181 - Lobar pneumonia, unspecified organism                   | 2.96      | 2.71    | 3.23    | 2.8%  | 86    | 651   | 1,926  | 67,625 | 5.44E-139 |
| J188 - Other pneumonia, unspecified organism                   | 3.99      | 3.26    | 4.88    | 0.7%  | 18    | 118   | 471    | 69,681 | 1.14E-47  |
| J189 - Pneumonia, unspecified organism                         | 5.73      | 5.48    | 6.00    | 18.9% | 1,155 | 2,204 | 12,638 | 54,291 | 0.00E+00  |
| J22 - Unspecified acute lower resp. infection                  | 28.77     | 23.75   | 34.84   | 4.4%  | 9     | 108   | 3,107  | 67,064 | 0.00E+00  |
| J80 - Acute respiratory distress syndrome                      | 41.60     | 33.00   | 52.45   | 4.3%  | 20    | 73    | 3,037  | 67,158 | 0.00E+00  |
| J84114 - Acute interstitial pneumonitis                        | 2.78      | 1.32    | 5.85    | 0.0%  | 0     | 9     | 25     | 70,254 | 1.01E-02  |
| J8489 - Other specified interstitial pulmonary diseases        | 1.85      | 1.26    | 2.71    | 0.1%  | 6     | 40    | 74     | 70,168 | 2.00E-03  |
| J849 - Interstitial pulmonary disease, unspecified             | 1.51      | 1.26    | 1.81    | 0.4%  | 69    | 195   | 295    | 69,729 | 7.74E-06  |
| J90 - Pleural effusion, NEC                                    | 1.56      | 1.45    | 1.68    | 2.8%  | 425   | 1,237 | 1,932  | 66,694 | 6.39E-35  |
| J930 - Spontaneous tension pneumothorax                        | 14.00     | 3.69    | 53.12   | 0.0%  | 0     | 2     | 28     | 70,258 | 5.01E-06  |
| J9311 - Primary spontaneous pneumothorax                       | 6.33      | 1.86    | 33.42   | 0.0%  | 0     | 3     | 19     | 70,266 | 8.55E-04  |
| J9383 - Other pneumothorax                                     | 2.61      | 1.62    | 4.20    | 0.1%  | 2     | 23    | 60     | 70,203 | 7.77E-05  |
| J939 - Pneumothorax, unspecified                               | 3.08      | 2.41    | 3.93    | 0.4%  | 6     | 85    | 262    | 69,935 | 3.45E-21  |
| J95811 - Postprocedural pneumothorax                           | 1.85      | 1.08    | 3.17    | 0.1%  | 0     | 20    | 37     | 70,231 | 3.41E-02  |
| J95851 - Ventilator associated pneumonia                       | 12.40     | 6.58    | 23.37   | 0.2%  | 0     | 10    | 124    | 70,154 | 1.64E-22  |
| J95859 - Other complication of respirator [ventilator]         | 6.00      | 1.34    | 55.20   | 0.0%  | 0     | 2     | 12     | 70,274 | 1.29E-02  |
| J9600 - Acute respiratory failure, unspecified ...             | 6.07      | 5.54    | 6.66    | 4.5%  | 169   | 521   | 3,165  | 66,433 | 0.00E+00  |
| J9601 - Acute respiratory failure with hypoxia                 | 13.12     | 12.28   | 14.01   | 18.1% | 638   | 950   | 12,464 | 56,236 | 0.00E+00  |
| J9602 - Acute respiratory failure with hypercapnia             | 2.46      | 2.14    | 2.84    | 0.9%  | 50    | 266   | 655    | 69,317 | 1.99E-37  |
| J9620 - Acute and chronic respiratory failure, unspecified ... | 1.74      | 1.46    | 2.08    | 0.5%  | 44    | 191   | 333    | 69,720 | 7.29E-10  |
| J9621 - Acute and chronic respiratory failure with hypoxia     | 2.47      | 2.20    | 2.78    | 1.4%  | 231   | 388   | 960    | 68,709 | 1.54E-54  |
| J9690 - Respiratory failure, unspecified, unspecified ...      | 6.73      | 6.04    | 7.51    | 3.6%  | 90    | 371   | 2,497  | 67,330 | 0.00E+00  |
| J9691 - Respiratory failure, unspecified with hypoxia          | 7.73      | 6.54    | 9.15    | 1.7%  | 36    | 153   | 1,183  | 68,916 | 2.25E-174 |
| J9811 - Atelectasis                                            | 1.19      | 1.11    | 1.28    | 2.5%  | 192   | 1,445 | 1,720  | 66,931 | 1.11E-06  |
| J982 - Interstitial emphysema                                  | 5.80      | 3.62    | 9.28    | 0.2%  | 2     | 20    | 116    | 70,150 | 3.76E-16  |
| J984 - Other disorders of lung                                 | 2.91      | 2.66    | 3.19    | 2.7%  | 124   | 636   | 1,853  | 67,675 | 3.25E-131 |
| J986 - Disorders of diaphragm                                  | 1.41      | 1.09    | 1.81    | 0.2%  | 7     | 101   | 142    | 70,038 | 1.03E-02  |
| J988 - Other specified respiratory disorders                   | 28.54     | 24.03   | 33.89   | 5.5%  | 25    | 134   | 3,824  | 66,305 | 0.00E+00  |
| J989 - Respiratory disorder, unspecified                       | 4.75      | 3.53    | 6.40    | 0.4%  | 2     | 52    | 247    | 69,987 | 3.28E-29  |
| N170 - Acute kidney failure with tubular necrosis              | 4.64      | 4.07    | 5.29    | 1.8%  | 43    | 275   | 1,276  | 68,694 | 3.10E-142 |
| N171 - Acute kidney failure with acute cortical necrosis       | 2.50      | 1.36    | 4.60    | 0.0%  | 0     | 14    | 35     | 70,239 | 4.27E-03  |
| N178 - Other acute kidney failure                              | 1.99      | 1.65    | 2.41    | 0.4%  | 25    | 157   | 313    | 69,793 | 8.70E-13  |
| N179 - Acute kidney failure, unspecified                       | 3.36      | 3.20    | 3.52    | 11.1% | 1,458 | 2,202 | 7,392  | 59,236 | 0.00E+00  |
| O480 - Post-term pregnancy                                     | 4.75      | 2.25    | 10.01   | 0.1%  | 0     | 8     | 38     | 70,242 | 1.90E-05  |

| eTable 4 / Code                                                    | OR (Est.) | OR (LI) | OR (UI) | Risk  | A     | B     | C      | D      | P-value   |
|--------------------------------------------------------------------|-----------|---------|---------|-------|-------|-------|--------|--------|-----------|
| O701 - Second degree perineal laceration during delivery           | 5.00      | 2.14    | 11.71   | 0.0%  | 0     | 6     | 30     | 70,252 | 1.26E-04  |
| O98511 - Other viral ... complicating pregnancy, first trimester   | 3.00      | 1.04    | 10.55   | 0.0%  | 0     | 5     | 15     | 70,268 | 4.14E-02  |
| O98512 - Other viral ... complicating pregnancy, second trimester  | 8.25      | 4.02    | 16.92   | 0.1%  | 0     | 8     | 66     | 70,214 | 3.45E-11  |
| O98513 - Other viral ... complicating pregnancy, third trimester   | 20.33     | 9.15    | 45.17   | 0.2%  | 2     | 6     | 122    | 70,158 | 2.85E-24  |
| O98519 - Other viral ... complicating pregnancy, unspecified ...   | 9.00      | 1.25    | 394.48  | 0.0%  | 0     | 1     | 9      | 70,278 | 2.15E-02  |
| O9852 - Other viral ... complicating childbirth                    | 116.00    | 20.35   | 661.10  | 0.2%  | 0     | 1     | 116    | 70,171 | 5.69E-26  |
| O9853 - Other viral ... complicating the puerperium                | 23.00     | 3.73    | 947.45  | 0.0%  | 0     | 1     | 23     | 70,264 | 2.98E-06  |
| R000 - Tachycardia, unspecified                                    | 1.87      | 1.76    | 1.99    | 4.0%  | 310   | 1,481 | 2,774  | 65,723 | 2.60E-87  |
| R05 - Cough                                                        | 2.79      | 2.70    | 2.88    | 22.0% | 2,350 | 4,965 | 13,838 | 49,135 | 0.00E+00  |
| R0600 - Dyspnea, unspecified                                       | 2.43      | 2.30    | 2.57    | 6.0%  | 397   | 1,687 | 4,104  | 64,100 | 3.35E-221 |
| R0602 - Shortness of breath                                        | 3.55      | 3.42    | 3.69    | 19.9% | 2,061 | 3,621 | 12,861 | 51,745 | 0.00E+00  |
| R0603 - Acute respiratory distress                                 | 5.05      | 4.48    | 5.69    | 2.3%  | 36    | 320   | 1,616  | 68,316 | 2.15E-190 |
| R0682 - Tachypnea, not elsewhere classified                        | 4.08      | 3.31    | 5.03    | 0.6%  | 4     | 110   | 449    | 69,725 | 2.32E-46  |
| R0689 - Other abnormalities of breathing                           | 2.06      | 1.86    | 2.28    | 1.6%  | 54    | 543   | 1,118  | 68,573 | 4.76E-45  |
| R069 - Unspecified abnormalities of breathing                      | 2.46      | 2.10    | 2.89    | 0.7%  | 34    | 213   | 525    | 69,516 | 2.40E-30  |
| R0902 - Hypoxemia                                                  | 7.07      | 6.63    | 7.53    | 11.3% | 449   | 1,096 | 7,746  | 60,997 | 0.00E+00  |
| R091 - Pleurisy                                                    | 1.97      | 1.32    | 2.94    | 0.1%  | 1     | 36    | 71     | 70,180 | 1.01E-03  |
| R092 - Respiratory arrest                                          | 5.44      | 3.21    | 9.21    | 0.1%  | 3     | 16    | 87     | 70,182 | 5.30E-12  |
| R0989 - Other symptoms ... circulatory & respiratory systems       | 1.17      | 1.09    | 1.26    | 2.4%  | 189   | 1,416 | 1,660  | 67,023 | 1.18E-05  |
| R197 - Diarrhea, unspecified                                       | 1.60      | 1.50    | 1.70    | 4.0%  | 250   | 1,712 | 2,733  | 65,593 | 7.76E-53  |
| R34 - Anuria & oliguria                                            | 3.81      | 2.77    | 5.24    | 0.3%  | 3     | 47    | 179    | 70,059 | 2.93E-18  |
| R401 - Stupor                                                      | 1.76      | 1.45    | 2.15    | 0.4%  | 7     | 153   | 270    | 69,858 | 1.70E-08  |
| R4020 - Unspecified coma                                           | 1.63      | 1.33    | 2.00    | 0.3%  | 2     | 150   | 245    | 69,891 | 2.25E-06  |
| R402114 - Coma scale, eyes open, never, ...                        | 10.00     | 1.42    | 433.98  | 0.0%  | 0     | 1     | 10     | 70,277 | 1.17E-02  |
| R402123 - Coma scale, eyes open, to pain, ...                      | 8.00      | 1.07    | 354.98  | 0.0%  | 0     | 1     | 8      | 70,279 | 3.91E-02  |
| R402124 - Coma scale, eyes open, to pain, ...                      | Inf       |         |         | 0.0%  | 0     | 0     | 6      | 70,282 | 3.13E-02  |
| R402214 - Coma scale, best verbal response, none, ...              | 13.00     | 1.95    | 552.47  | 0.0%  | 0     | 1     | 13     | 70,274 | 1.83E-03  |
| R402314 - Coma scale, best motor response, none, ...               | Inf       |         |         | 0.0%  | 0     | 0     | 8      | 70,280 | 7.81E-03  |
| R402344 - Coma scale, best motor response, flexion withdrawal ...  | 9.00      | 1.25    | 394.48  | 0.0%  | 0     | 1     | 9      | 70,278 | 2.15E-02  |
| R402431 - Glasgow coma scale score 3-8, in the field ...           | 3.00      | 1.37    | 6.55    | 0.0%  | 0     | 8     | 24     | 70,256 | 8.01E-03  |
| R404 - Transient alteration of awareness                           | 1.20      | 1.06    | 1.36    | 0.8%  | 59    | 466   | 559    | 69,204 | 4.06E-03  |
| R4182 - Altered mental status, unspecified                         | 1.50      | 1.42    | 1.57    | 5.7%  | 977   | 2,542 | 3,804  | 62,965 | 1.95E-56  |
| R430 - Anosmia                                                     | 18.00     | 10.14   | 31.94   | 0.3%  | 2     | 12    | 216    | 70,058 | 3.34E-41  |
| R432 - Parageusia                                                  | 11.00     | 5.82    | 20.79   | 0.2%  | 0     | 10    | 110    | 70,168 | 1.60E-19  |
| R438 - Other disturbances of smell and taste                       | 12.29     | 5.79    | 26.07   | 0.1%  | 0     | 7     | 86     | 70,195 | 6.05E-16  |
| R439 - Unspecified disturbances of smell and taste                 | 21.25     | 8.10    | 55.77   | 0.1%  | 0     | 4     | 85     | 70,199 | 2.25E-17  |
| R502 - Drug induced fever                                          | 2.56      | 1.20    | 5.42    | 0.0%  | 0     | 9     | 23     | 70,256 | 2.16E-02  |
| R5081 - Fever presenting with conditions, CE                       | 4.90      | 4.11    | 5.86    | 1.0%  | 23    | 146   | 716    | 69,403 | 1.13E-83  |
| R5084 - Febrile nonhemolytic transfusion reaction                  | Inf       |         |         | 0.0%  | 0     | 0     | 18     | 70,270 | 7.63E-06  |
| R509 - Fever, unspecified                                          | 6.42      | 6.14    | 6.71    | 21.6% | 1,004 | 2,254 | 14,477 | 52,553 | 0.00E+00  |
| R531 - Weakness                                                    | 1.21      | 1.16    | 1.26    | 7.2%  | 1,357 | 3,894 | 4,698  | 60,339 | 4.60E-18  |
| R532 - Functional quadriplegia                                     | 1.83      | 1.43    | 2.33    | 0.3%  | 26    | 99    | 181    | 69,982 | 1.29E-06  |
| R5381 - Other malaise                                              | 1.22      | 1.15    | 1.30    | 3.3%  | 548   | 1,830 | 2,237  | 65,673 | 1.94E-10  |
| R5383 - Other fatigue                                              | 1.13      | 1.07    | 1.19    | 4.0%  | 344   | 2,369 | 2,677  | 64,898 | 1.55E-05  |
| R570 - Cardiogenic shock                                           | 2.21      | 1.66    | 2.93    | 0.2%  | 5     | 68    | 150    | 70,065 | 4.11E-08  |
| R571 - Hypovolemic shock                                           | 2.03      | 1.49    | 2.77    | 0.2%  | 5     | 60    | 122    | 70,101 | 6.14E-06  |
| R578 - Other shock                                                 | 4.29      | 2.97    | 6.18    | 0.2%  | 1     | 35    | 150    | 70,102 | 5.23E-17  |
| R579 - Shock, unspecified                                          | 7.42      | 5.93    | 9.29    | 0.9%  | 4     | 86    | 638    | 69,560 | 3.40E-93  |
| R627 - Adult failure to thrive                                     | 1.57      | 1.40    | 1.77    | 1.0%  | 256   | 461   | 726    | 68,845 | 1.82E-14  |
| R6510 - SIRS of non-infectious origin without acute organ ...      | 2.24      | 1.87    | 2.68    | 0.5%  | 24    | 170   | 381    | 69,713 | 3.68E-19  |
| R6511 - SIRS of non-infectious origin with acute organ dysfunction | 2.25      | 1.26    | 4.02    | 0.1%  | 0     | 16    | 36     | 70,236 | 8.42E-03  |

| eTable 4 / Code                                                          | OR (Est.) | OR (LI) | OR (UI) | Risk  | A   | B     | C      | D      | P-value   |
|--------------------------------------------------------------------------|-----------|---------|---------|-------|-----|-------|--------|--------|-----------|
| R6520 - Severe sepsis without septic shock                               | 3.81      | 3.39    | 4.28    | 1.9%  | 40  | 352   | 1,341  | 68,555 | 2.08E-127 |
| R6521 - Severe sepsis with septic shock                                  | 6.40      | 5.68    | 7.21    | 2.8%  | 62  | 310   | 1,983  | 67,933 | 4.14E-267 |
| R680 - Hypothermia, not associated with low ... temperature              | 1.73      | 1.07    | 2.79    | 0.1%  | 4   | 26    | 45     | 70,213 | 3.27E-02  |
| R6883 - Chills (without fever)                                           | 1.71      | 1.43    | 2.05    | 0.5%  | 5   | 189   | 324    | 69,770 | 3.29E-09  |
| R6889 - Other general symptoms and signs                                 | 2.27      | 2.14    | 2.41    | 5.4%  | 557 | 1,622 | 3,684  | 64,425 | 4.10E-176 |
| R740 - Nonspecific elevation of levels of transaminase and LDH           | 3.07      | 2.72    | 3.46    | 1.5%  | 47  | 351   | 1,077  | 68,813 | 4.89E-82  |
| R7881 - Bacteremia                                                       | 1.55      | 1.39    | 1.73    | 1.2%  | 113 | 518   | 802    | 68,855 | 6.74E-15  |
| R791 - Abnormal coagulation profile                                      | 1.57      | 1.35    | 1.82    | 0.7%  | 45  | 290   | 455    | 69,498 | 1.87E-09  |
| R7981 - Abnormal blood-gas level                                         | 2.74      | 2.11    | 3.56    | 0.3%  | 8   | 76    | 208    | 69,996 | 7.64E-15  |
| R7982 - Elevated C-reactive protein (CRP)                                | 2.33      | 1.84    | 2.94    | 0.3%  | 5   | 100   | 233    | 69,950 | 4.71E-13  |
| R7989 - Other specified abnormal findings of blood chemistry             | 1.10      | 1.03    | 1.17    | 2.8%  | 235 | 1,767 | 1,935  | 66,351 | 6.06E-03  |
| R918 - Other nonspecific abnormal finding of lung field                  | 4.16      | 3.96    | 4.37    | 12.5% | 875 | 2,031 | 8,447  | 58,935 | 0.00E+00  |
| T380X5A - Adverse effect of glucocorticoids and synthetic ...            | 2.35      | 1.83    | 3.01    | 0.3%  | 10  | 89    | 209    | 69,980 | 5.44E-12  |
| Z20818 - Contact with and (suspected) exposure to other bacterial ...    | 7.94      | 5.51    | 11.44   | 0.4%  | 2   | 32    | 254    | 70,000 | 5.02E-39  |
| Z20820 - Contact with and (suspected) exposure to varicella              | 4.67      | 1.30    | 25.33   | 0.0%  | 0   | 3     | 14     | 70,271 | 1.27E-02  |
| Z20828 - Contact with and (suspected) exposure to other viral ...        | 38.97     | 34.73   | 43.72   | 16.6% | 90  | 297   | 11,573 | 58,328 | 0.00E+00  |
| Z2089 - Contact with and (suspected) exposure to other ...               | 7.96      | 5.17    | 12.23   | 0.3%  | 3   | 23    | 183    | 70,079 | 1.60E-28  |
| Z209 - Contact with and (suspected) exposure to unspecified ...          | 8.32      | 5.64    | 12.29   | 0.3%  | 2   | 28    | 233    | 70,025 | 1.49E-36  |
| Z299 - Encounter for prophylactic measures, unspecified                  | 2.73      | 2.11    | 3.54    | 0.3%  | 18  | 79    | 216    | 69,975 | 2.41E-15  |
| Z370 - Single live birth                                                 | 3.17      | 2.43    | 4.15    | 0.3%  | 1   | 70    | 222    | 69,995 | 9.87E-19  |
| Z452 - Encounter for adjustment and management of vascular ...           | 2.42      | 2.22    | 2.62    | 2.8%  | 139 | 792   | 1,913  | 67,444 | 7.40E-103 |
| Z4659 - Encounter for fitting / adjustment of other gastrointestinal ... | 2.61      | 2.18    | 3.12    | 0.6%  | 9   | 165   | 430    | 69,684 | 2.68E-27  |
| Z4682 - Encounter for fitting / adjustment of non-vascular catheter      | 5.23      | 4.72    | 5.79    | 3.2%  | 59  | 431   | 2,253  | 67,545 | 1.18E-270 |
| Z4689 - Encounter for fitting / adjustment of other specified devices    | 1.98      | 1.41    | 2.78    | 0.1%  | 6   | 50    | 99     | 70,133 | 8.41E-05  |
| Z515 - Encounter for palliative care                                     | 5.47      | 4.91    | 6.09    | 3.0%  | 134 | 389   | 2,127  | 67,638 | 9.14E-263 |
| Z66 - Do not resuscitate                                                 | 5.51      | 4.92    | 6.17    | 2.8%  | 134 | 353   | 1,946  | 67,855 | 9.84E-242 |
| Z743 - Need for continuous supervision                                   | 1.75      | 1.65    | 1.85    | 4.9%  | 983 | 1,909 | 3,334  | 64,062 | 4.20E-86  |
| Z9911 - Dependence on respirator [ventilator] status                     | 8.30      | 7.04    | 9.78    | 1.9%  | 36  | 159   | 1,319  | 68,774 | 1.17E-199 |
| Z9981 - Dependence on supplemental oxygen                                | 3.59      | 3.32    | 3.90    | 3.9%  | 342 | 753   | 2,707  | 66,486 | 1.01E-241 |
| Z9989 - Dependence on other enabling machines and devices                | 1.47      | 1.31    | 1.65    | 1.1%  | 83  | 498   | 733    | 68,974 | 2.57E-11  |

**eTable 5. Candidate COVID-19 complications, by individual ICD-10 code (secondary analysis)**

This table shows findings for individual-level codes that increased in odds with COVID-19 at a Bonferroni-corrected level of significance, excluding those already reported in eTable 4. OR (Est.): odds ratio for association with COVID-19, point estimate. OR (LI) and OR (UI): 95% lower and upper confidence intervals for the odds ratio. OR, Risk, A, B, C, and D are defined in eFigure 3. P-value: p-value from McNemar test (null hypothesis: OR = 1). The significance threshold for this analysis was  $0.05/64,931 = 7.7E-07$ .

*Authors' interpretation:* Some diagnosis codes identified in this secondary analysis (e.g., A0839) had header codes (e.g. A08) that were not identified in the primary analysis. This can occur when there are other individual codes within the same header code that have opposing strengths of association. For example, while A0839 here has an OR of 18.00, the code A0811 had an OR of 0.35 and A084 had an OR of 0.55 (data not shown); on balance, this resulted in the header code of all of these individual codes (A08) having an OR of 1.14, which was not significant in the primary analysis.

| eTable 5 / Code                                                               | OR (Est.) | OR (LI) | OR (UI) | Risk | A   | B     | C     | D      | P-value  |
|-------------------------------------------------------------------------------|-----------|---------|---------|------|-----|-------|-------|--------|----------|
| A0839 - Other viral enteritis                                                 | 18.00     | 8.96    | 36.16   | 0.2% | 2   | 8     | 144   | 70,134 | 6.65E-28 |
| E1110 - Type 2 diabetes mellitus with ketoacidosis without coma               | 3.12      | 2.50    | 3.89    | 0.5% | 27  | 103   | 321   | 69,837 | 5.74E-26 |
| G4736 - Sleep related hypoventilation in conditions, CE                       | 5.47      | 3.28    | 9.12    | 0.1% | 3   | 17    | 93    | 70,175 | 8.62E-13 |
| I514 - Myocarditis, unspecified                                               | 9.25      | 3.44    | 24.91   | 0.1% | 0   | 4     | 37    | 70,247 | 5.81E-07 |
| J208 - Acute bronchitis due to other specified organisms                      | 3.08      | 2.64    | 3.60    | 0.9% | 17  | 212   | 653   | 69,406 | 1.33E-50 |
| J218 - Acute bronchiolitis due to other specified organisms                   | 3.89      | 2.33    | 6.49    | 0.1% | 8   | 18    | 70    | 70,192 | 5.43E-08 |
| J440 - Chronic obstructive pulmonary disease with acute lower resp. infection | 3.08      | 2.74    | 3.47    | 1.6% | 119 | 362   | 1,115 | 68,692 | 2.95E-85 |
| M6282 - Rhabdomyolysis                                                        | 1.96      | 1.65    | 2.33    | 0.5% | 70  | 195   | 383   | 69,640 | 7.36E-15 |
| M7910 - Myalgia, unspecified site                                             | 1.54      | 1.38    | 1.73    | 1.1% | 42  | 501   | 773   | 68,972 | 3.14E-14 |
| O99513 - Diseases of the resp. system complicating pregnancy, third trimester | 3.68      | 2.23    | 6.08    | 0.1% | 0   | 19    | 70    | 70,199 | 1.16E-07 |
| R042 - Hemoptysis                                                             | 1.63      | 1.35    | 1.98    | 0.4% | 8   | 166   | 271   | 69,843 | 6.52E-07 |
| R630 - Anorexia                                                               | 2.19      | 1.95    | 2.46    | 1.3% | 94  | 413   | 906   | 68,875 | 8.25E-42 |
| R638 - Other symptoms and signs concerning food and fluid intake              | 2.28      | 1.88    | 2.76    | 0.5% | 55  | 148   | 337   | 69,748 | 1.38E-17 |
| R9431 - Abnormal electrocardiogram [ECG] [EKG]                                | 1.26      | 1.19    | 1.34    | 3.6% | 308 | 1,960 | 2,472 | 65,548 | 1.64E-14 |
| Z1159 - Encounter for screening for other viral diseases                      | 2.73      | 2.40    | 3.10    | 1.3% | 12  | 321   | 877   | 69,078 | 7.30E-58 |
| Z1383 - Encounter for screening for respiratory disorder NEC                  | 5.82      | 4.03    | 8.40    | 0.3% | 0   | 33    | 192   | 70,063 | 6.06E-26 |
| Z3A39 - 39 weeks gestation of pregnancy                                       | 3.29      | 2.09    | 5.18    | 0.1% | 2   | 24    | 79    | 70,183 | 1.03E-07 |
| Z604 - Social exclusion and rejection                                         | 6.63      | 3.94    | 11.14   | 0.2% | 5   | 16    | 106   | 70,161 | 7.78E-16 |
| Z655 - Exposure to disaster, war and other hostilities                        | Inf       |         |         | 0.1% | 0   | 0     | 43    | 70,245 | 1.50E-10 |
| Z7189 - Other specified counseling                                            | 1.59      | 1.46    | 1.73    | 2.0% | 102 | 863   | 1,375 | 67,948 | 3.38E-27 |
| Z781 - Physical restraint status                                              | 1.91      | 1.55    | 2.37    | 0.3% | 6   | 128   | 245   | 69,909 | 1.90E-09 |
| Z8619 - Personal history of other infectious and parasitic diseases           | 2.67      | 2.32    | 3.08    | 1.0% | 37  | 265   | 708   | 69,278 | 1.41E-45 |
| Z978 - Presence of other specified devices                                    | 2.62      | 2.02    | 3.39    | 0.3% | 8   | 79    | 207   | 69,994 | 5.93E-14 |



**eTable 6. Risk estimates for acute kidney failure, respiratory failure/ARDS, pneumonia, and SIRS/sepsis/septic shock**

These data correspond to Figure 4 in the main manuscript. Some conditions listed here are composites of more than one ICD-10 header code. Pneumonia: defined as J12 (viral pneumonia, not elsewhere classified) or J18 (pneumonia, unspecified organism). Respiratory failure or ARDS: defined as J96 (respiratory failure, not elsewhere classified) or J80 (acute respiratory distress syndrome). Acute kidney failure: defined as N17 (acute kidney failure). SIRS, sepsis, or septic shock: defined as A41 (other sepsis) or R65 (symptoms and signs specifically associated with systemic inflammation and infection). SIRS: systemic inflammatory response syndrome. Risk, A, B, C, and D are defined in eFigure 3.

| eTable 6 / Condition          | Hosp. status | Age group | Risk  | A     | B     | C      | D      |
|-------------------------------|--------------|-----------|-------|-------|-------|--------|--------|
| Acute Kidney Failure          | All          | All       | 11.8% | 1,558 | 2,240 | 7,833  | 58,657 |
| Acute Kidney Failure          | All          | <18       | 0.7%  | 4     | 7     | 10     | 1,350  |
| Acute Kidney Failure          | All          | 18 - 65   | 7.2%  | 444   | 686   | 2,340  | 29,977 |
| Acute Kidney Failure          | All          | >= 65     | 16.7% | 1,110 | 1,547 | 5,483  | 27,330 |
| Acute Kidney Failure          | Inpatient    | All       | 21.2% | 1,423 | 1,544 | 7,347  | 27,229 |
| Acute Kidney Failure          | Inpatient    | <18       | 3.7%  | 4     | 5     | 10     | 261    |
| Acute Kidney Failure          | Inpatient    | 18 - 65   | 17.9% | 394   | 442   | 2,179  | 10,011 |
| Acute Kidney Failure          | Inpatient    | >= 65     | 23.3% | 1,025 | 1,097 | 5,158  | 16,957 |
| Acute Kidney Failure          | ICU          | All       | 50.7% | 245   | 78    | 1,495  | 1,451  |
| Acute Kidney Failure          | ICU          | <18       | 11.1% | 1     | 1     | 8      | 64     |
| Acute Kidney Failure          | ICU          | 18 - 65   | 41.0% | 59    | 31    | 408    | 587    |
| Acute Kidney Failure          | ICU          | >= 65     | 57.4% | 185   | 46    | 1,079  | 800    |
| Respiratory failure or ARDS   | All          | All       | 23.5% | 1,957 | 1,323 | 15,729 | 51,279 |
| Respiratory failure or ARDS   | All          | <18       | 5.9%  | 18    | 14    | 79     | 1,260  |
| Respiratory failure or ARDS   | All          | 18 - 65   | 17.9% | 606   | 465   | 5,806  | 26,570 |
| Respiratory failure or ARDS   | All          | >= 65     | 29.6% | 1,333 | 844   | 9,844  | 23,449 |
| Respiratory failure or ARDS   | Inpatient    | All       | 41.3% | 1,762 | 790   | 14,464 | 20,527 |
| Respiratory failure or ARDS   | Inpatient    | <18       | 28.7% | 13    | 9     | 74     | 184    |
| Respiratory failure or ARDS   | Inpatient    | 18 - 65   | 42.7% | 538   | 278   | 5,214  | 6,996  |
| Respiratory failure or ARDS   | Inpatient    | >= 65     | 40.7% | 1,211 | 503   | 9,176  | 13,347 |
| Respiratory failure or ARDS   | ICU          | All       | 79.2% | 256   | 28    | 2,364  | 621    |
| Respiratory failure or ARDS   | ICU          | <18       | 65.1% | 9     | 2     | 41     | 22     |
| Respiratory failure or ARDS   | ICU          | 18 - 65   | 75.8% | 74    | 9     | 760    | 242    |
| Respiratory failure or ARDS   | ICU          | >= 65     | 81.4% | 173   | 17    | 1,563  | 357    |
| Pneumonia                     | All          | All       | 36.6% | 2,043 | 1,794 | 24,315 | 42,136 |
| Pneumonia                     | All          | <18       | 9.9%  | 15    | 40    | 130    | 1,186  |
| Pneumonia                     | All          | 18 - 65   | 31.0% | 606   | 635   | 9,982  | 22,224 |
| Pneumonia                     | All          | >= 65     | 43.1% | 1,422 | 1,119 | 14,203 | 18,726 |
| Pneumonia                     | Inpatient    | All       | 57.6% | 1,724 | 949   | 20,081 | 14,789 |
| Pneumonia                     | Inpatient    | <18       | 33.1% | 11    | 12    | 85     | 172    |
| Pneumonia                     | Inpatient    | 18 - 65   | 62.1% | 488   | 285   | 7,603  | 4,650  |
| Pneumonia                     | Inpatient    | >= 65     | 55.4% | 1,225 | 652   | 12,393 | 9,967  |
| Pneumonia                     | ICU          | All       | 88.4% | 211   | 26    | 2,679  | 353    |
| Pneumonia                     | ICU          | <18       | 53.1% | 6     | 4     | 34     | 30     |
| Pneumonia                     | ICU          | 18 - 65   | 88.8% | 51    | 6     | 913    | 115    |
| Pneumonia                     | ICU          | >= 65     | 89.3% | 154   | 16    | 1,732  | 208    |
| SIRS, sepsis, or septic shock | All          | All       | 11.2% | 826   | 1,759 | 7,559  | 60,144 |
| SIRS, sepsis, or septic shock | All          | <18       | 1.7%  | 3     | 7     | 23     | 1,338  |
| SIRS, sepsis, or septic shock | All          | 18 - 65   | 8.9%  | 309   | 593   | 2,911  | 29,634 |
| SIRS, sepsis, or septic shock | All          | >= 65     | 13.7% | 514   | 1,159 | 4,625  | 29,172 |
| SIRS, sepsis, or septic shock | Inpatient    | All       | 20.1% | 767   | 1,209 | 7,135  | 28,432 |
| SIRS, sepsis, or septic shock | Inpatient    | <18       | 8.1%  | 3     | 5     | 22     | 250    |

| <b>eTable 6 / Condition</b>   | <b>Hosp. status</b> | <b>Age group</b> | <b>Risk</b> | <b>A</b> | <b>B</b> | <b>C</b> | <b>D</b> |
|-------------------------------|---------------------|------------------|-------------|----------|----------|----------|----------|
| SIRS, sepsis, or septic shock | Inpatient           | 18 - 65          | 22.0%       | 281      | 383      | 2,721    | 9,641    |
| SIRS, sepsis, or septic shock | Inpatient           | >= 65            | 19.2%       | 483      | 821      | 4,392    | 18,541   |
| SIRS, sepsis, or septic shock | ICU                 | All              | 55.3%       | 129      | 52       | 1,708    | 1,380    |
| SIRS, sepsis, or septic shock | ICU                 | <18              | 15.7%       | 3        | 1        | 11       | 59       |
| SIRS, sepsis, or septic shock | ICU                 | 18 - 65          | 55.3%       | 39       | 14       | 571      | 461      |
| SIRS, sepsis, or septic shock | ICU                 | >= 65            | 56.7%       | 87       | 37       | 1,126    | 860      |



**eTable 7. Risks of candidate COVID-19 complications, by age**

Risk, A, B, C, and D are defined in eFigure 3.

| eTable 7 / Code                                | Age < 18 |     |     |     |       | Age 18 to <65 |       |       |       |        | Age >= 65 |       |       |        |        |
|------------------------------------------------|----------|-----|-----|-----|-------|---------------|-------|-------|-------|--------|-----------|-------|-------|--------|--------|
|                                                | Risk     | A   | B   | C   | D     | Risk          | A     | B     | C     | D      | Risk      | A     | B     | C      | D      |
| A41 - Other sepsis                             | 1.6%     | 3   | 5   | 22  | 1,341 | 8.3%          | 273   | 565   | 2,706 | 29,903 | 12.9%     | 451   | 1,106 | 4,358  | 29,555 |
| B33 - Other viral diseases, NEC                | 1.5%     | 1   | 2   | 21  | 1,347 | 0.3%          | 2     | 5     | 91    | 33,349 | 0.2%      | 0     | 9     | 62     | 35,399 |
| B34 - Viral infection of unspecified site      | 15.3%    | 31  | 101 | 190 | 1,049 | 10.9%         | 91    | 492   | 3,595 | 29,269 | 8.0%      | 28    | 188   | 2,827  | 32,427 |
| B96 - Other bacterial agents, CE               | 2.0%     | 2   | 11  | 27  | 1,331 | 1.3%          | 39    | 526   | 416   | 32,466 | 3.0%      | 111   | 653   | 1,046  | 33,660 |
| B99 - Other infectious diseases                | 0.3%     | 1   | 0   | 4   | 1,366 | 0.4%          | 3     | 61    | 131   | 33,252 | 0.7%      | 7     | 74    | 262    | 35,127 |
| D61 - Other aplastic anemias / bone marrow     | 0.3%     | 4   | 4   | 4   | 1,359 | 0.4%          | 51    | 97    | 132   | 33,167 | 0.7%      | 60    | 153   | 244    | 35,013 |
| D65 - Disseminated intravascular coagulation   | 0.0%     | 0   | 0   | 0   | 1,371 | 0.1%          | 0     | 4     | 20    | 33,423 | 0.1%      | 0     | 2     | 51     | 35,417 |
| D69 - Purpura/other hemorrhagic conditions     | 0.9%     | 3   | 8   | 12  | 1,348 | 1.5%          | 99    | 299   | 489   | 32,560 | 2.5%      | 229   | 589   | 861    | 33,791 |
| D72 - Other disorders of white blood cells     | 2.4%     | 3   | 8   | 32  | 1,328 | 3.2%          | 102   | 646   | 1,045 | 31,654 | 4.7%      | 198   | 964   | 1,627  | 32,681 |
| E43 - Unspecified severe malnutrition          | 0.4%     | 4   | 2   | 6   | 1,359 | 0.6%          | 55    | 120   | 191   | 33,081 | 1.7%      | 129   | 252   | 591    | 34,498 |
| E46 - Unspecified malnutrition                 | 0.5%     | 1   | 1   | 7   | 1,362 | 0.4%          | 50    | 154   | 149   | 33,094 | 1.5%      | 168   | 368   | 535    | 34,399 |
| G72 - Other & unspecified myopathies           | 0.0%     | 0   | 0   | 0   | 1,371 | 0.3%          | 9     | 35    | 113   | 33,290 | 0.5%      | 20    | 74    | 181    | 35,195 |
| G92 - Toxic encephalopathy                     | 0.0%     | 0   | 0   | 0   | 1,371 | 0.4%          | 7     | 92    | 146   | 33,202 | 1.2%      | 35    | 246   | 439    | 34,750 |
| G93 - Other disorders of brain                 | 0.7%     | 9   | 18  | 10  | 1,334 | 2.5%          | 215   | 547   | 821   | 31,864 | 7.4%      | 563   | 1,160 | 2,497  | 31,250 |
| I21 - Acute myocardial infarction              | 0.0%     | 0   | 0   | 0   | 1,371 | 0.9%          | 61    | 232   | 301   | 32,853 | 2.7%      | 188   | 541   | 927    | 33,814 |
| I24 - Other acute ischemic heart diseases      | 0.0%     | 1   | 0   | 0   | 1,370 | 0.3%          | 12    | 70    | 94    | 33,271 | 1.0%      | 31    | 171   | 337    | 34,931 |
| I26 - Pulmonary embolism                       | 0.2%     | 0   | 0   | 3   | 1,368 | 1.0%          | 55    | 187   | 319   | 32,886 | 1.1%      | 140   | 240   | 387    | 34,703 |
| I40 - Acute myocarditis                        | 0.0%     | 0   | 0   | 0   | 1,371 | 0.1%          | 0     | 2     | 21    | 33,424 | 0.1%      | 0     | 4     | 28     | 35,438 |
| I45 - Other conduction disorders               | 0.1%     | 0   | 2   | 2   | 1,367 | 0.9%          | 38    | 198   | 286   | 32,925 | 1.7%      | 113   | 440   | 603    | 34,314 |
| I46 - Cardiac arrest                           | 0.4%     | 1   | 2   | 5   | 1,363 | 0.7%          | 15    | 39    | 243   | 33,150 | 1.5%      | 12    | 34    | 534    | 34,890 |
| I48 - Atrial fibrillation & flutter            | 0.0%     | 0   | 0   | 0   | 1,371 | 1.4%          | 416   | 459   | 463   | 32,109 | 8.2%      | 2,762 | 2,030 | 2,510  | 28,168 |
| I95 - Hypotension                              | 0.6%     | 1   | 7   | 8   | 1,355 | 2.5%          | 124   | 424   | 823   | 32,076 | 5.1%      | 341   | 1,001 | 1,741  | 32,387 |
| J06 - Acute upper respiratory infections       | 17.7%    | 79  | 241 | 186 | 865   | 8.1%          | 264   | 1,926 | 2,527 | 28,730 | 3.6%      | 97    | 902   | 1,256  | 33,215 |
| J12 - Viral pneumonia, NEC                     | 5.7%     | 5   | 6   | 78  | 1,282 | 23.6%         | 23    | 40    | 7,878 | 25,506 | 32.3%     | 47    | 63    | 11,406 | 23,954 |
| J15 - Bacterial pneumonia, NEC                 | 1.3%     | 1   | 8   | 18  | 1,344 | 1.5%          | 30    | 159   | 515   | 32,743 | 2.4%      | 46    | 231   | 843    | 34,350 |
| J16 - Pneumonia due to other organisms         | 0.2%     | 0   | 0   | 3   | 1,368 | 0.5%          | 2     | 22    | 154   | 33,269 | 0.4%      | 8     | 28    | 156    | 35,278 |
| J17 - Pneumonia in diseases, CE                | 0.0%     | 0   | 1   | 0   | 1,370 | 0.1%          | 2     | 6     | 17    | 33,422 | 0.1%      | 3     | 5     | 29     | 35,433 |
| J18 - Pneumonia, unspecified organism          | 7.5%     | 11  | 36  | 99  | 1,225 | 17.8%         | 382   | 834   | 5,729 | 26,502 | 23.5%     | 977   | 1,521 | 7,763  | 25,209 |
| J22 - Unspecified acute lower resp. infection  | 3.1%     | 0   | 1   | 42  | 1,328 | 5.3%          | 7     | 69    | 1,783 | 31,588 | 3.6%      | 2     | 38    | 1,282  | 34,148 |
| J80 - Acute respiratory distress syndrome      | 0.9%     | 0   | 2   | 12  | 1,357 | 3.9%          | 11    | 32    | 1,301 | 32,103 | 4.9%      | 9     | 39    | 1,724  | 33,698 |
| J84 - Other interstitial pulmonary diseases    | 0.1%     | 2   | 2   | 2   | 1,365 | 0.6%          | 47    | 120   | 197   | 33,083 | 1.0%      | 113   | 277   | 345    | 34,735 |
| J90 - Pleural effusion, NEC                    | 1.0%     | 1   | 8   | 14  | 1,348 | 2.0%          | 121   | 375   | 646   | 32,305 | 3.7%      | 303   | 854   | 1,272  | 33,041 |
| J93 - Pneumothorax & air leak                  | 0.1%     | 1   | 0   | 2   | 1,368 | 0.4%          | 5     | 31    | 135   | 33,276 | 0.5%      | 3     | 61    | 174    | 35,232 |
| J95 - Procedural complications of resp. system | 0.1%     | 1   | 2   | 1   | 1,367 | 0.3%          | 9     | 60    | 93    | 33,285 | 0.4%      | 10    | 74    | 140    | 35,246 |
| J96 - Respiratory failure, NEC                 | 5.6%     | 18  | 13  | 75  | 1,265 | 17.2%         | 592   | 471   | 5,573 | 26,811 | 28.5%     | 1,311 | 848   | 9,485  | 23,826 |
| J98 - Other respiratory disorders              | 17.0%    | 36  | 33  | 221 | 1,081 | 10.5%         | 209   | 789   | 3,407 | 29,042 | 10.5%     | 352   | 1,269 | 3,550  | 30,299 |
| N17 - Acute kidney failure                     | 0.7%     | 4   | 7   | 10  | 1,350 | 7.2%          | 444   | 686   | 2,340 | 29,977 | 16.7%     | 1,110 | 1,547 | 5,483  | 27,330 |
| O48 - Late pregnancy                           | 0.1%     | 0   | 0   | 2   | 1,369 | 0.1%          | 0     | 8     | 36    | 33,403 | 0.0%      | 0     | 0     | 0      | 35,470 |
| O70 - Perineal laceration during delivery      | 0.1%     | 0   | 0   | 2   | 1,369 | 0.1%          | 0     | 14    | 50    | 33,383 | 0.0%      | 0     | 0     | 0      | 35,470 |
| O98 - Maternal infectious diseases             | 0.2%     | 1   | 0   | 3   | 1,367 | 0.9%          | 17    | 32    | 312   | 33,086 | 0.0%      | 0     | 0     | 0      | 35,470 |
| R00 - Abnormalities of heart beat              | 4.3%     | 7   | 22  | 58  | 1,284 | 5.5%          | 300   | 1,420 | 1,746 | 29,981 | 5.3%      | 316   | 1,537 | 1,792  | 31,825 |
| R05 - Cough                                    | 25.9%    | 114 | 147 | 287 | 823   | 26.3%         | 1,275 | 2,396 | 7,835 | 21,941 | 17.8%     | 961   | 2,422 | 5,716  | 26,371 |
| R06 - Abnormalities of breathing               | 13.4%    | 53  | 79  | 166 | 1,073 | 26.9%         | 1,561 | 2,067 | 8,035 | 21,784 | 25.9%     | 1,993 | 2,595 | 8,001  | 22,881 |
| R09 - Other s/s circulatory/respiratory system | 9.1%     | 48  | 86  | 112 | 1,125 | 11.9%         | 356   | 1,335 | 3,790 | 27,966 | 16.2%     | 667   | 1,580 | 5,394  | 27,829 |
| R19 - Other s/s digestive system & abdomen     | 3.8%     | 13  | 60  | 49  | 1,249 | 4.5%          | 143   | 1,076 | 1,442 | 30,786 | 4.3%      | 212   | 1,225 | 1,479  | 32,554 |
| R34 - Anuria & oliguria                        | 0.2%     | 0   | 0   | 3   | 1,368 | 0.2%          | 0     | 23    | 69    | 33,355 | 0.3%      | 3     | 24    | 107    | 35,336 |

| eTable 7 / Code                               | Age < 18 |     |     |     |       | Age 18 to <65 |     |       |       |        | Age >= 65 |       |       |       |        |
|-----------------------------------------------|----------|-----|-----|-----|-------|---------------|-----|-------|-------|--------|-----------|-------|-------|-------|--------|
| R40 - Somnolence, stupor & coma               | 0.7%     | 0   | 8   | 9   | 1,354 | 1.1%          | 48  | 340   | 356   | 32,703 | 2.8%      | 94    | 629   | 969   | 33,778 |
| R41 - Other s/s involving cognitive functions | 1.2%     | 1   | 7   | 17  | 1,346 | 3.2%          | 333 | 963   | 1,029 | 31,122 | 11.9%     | 1,653 | 2,948 | 3,683 | 27,186 |
| R43 - Disturbances of smell & taste           | 0.7%     | 0   | 0   | 9   | 1,362 | 1.1%          | 2   | 20    | 367   | 33,058 | 0.1%      | 0     | 9     | 48    | 35,413 |
| R50 - Fever of other & unknown origin         | 29.2%    | 123 | 166 | 316 | 766   | 22.4%         | 454 | 1,114 | 7,125 | 24,754 | 21.7%     | 489   | 994   | 7,391 | 26,596 |
| R53 - Malaise & fatigue                       | 3.1%     | 5   | 20  | 42  | 1,304 | 9.1%          | 726 | 2,421 | 2,765 | 27,535 | 16.9%     | 2,069 | 3,983 | 4,974 | 24,444 |
| R57 - Shock, NEC                              | 0.1%     | 0   | 0   | 1   | 1,370 | 1.2%          | 11  | 83    | 397   | 32,956 | 1.6%      | 9     | 118   | 558   | 34,785 |
| R62 - Lack of expected normal development     | 1.0%     | 48  | 62  | 12  | 1,249 | 0.3%          | 40  | 114   | 104   | 33,189 | 1.9%      | 231   | 371   | 669   | 34,199 |
| R65 - S/s of systemic inflammation/infection  | 0.8%     | 1   | 3   | 11  | 1,356 | 3.9%          | 67  | 261   | 1,283 | 31,836 | 6.0%      | 105   | 441   | 2,109 | 32,815 |
| R68 - Other general s/s                       | 3.7%     | 1   | 45  | 49  | 1,276 | 6.6%          | 267 | 1,041 | 2,121 | 30,018 | 5.5%      | 348   | 938   | 1,872 | 32,312 |
| R74 - Abnormal serum enzyme levels            | 0.7%     | 2   | 7   | 10  | 1,352 | 2.1%          | 45  | 466   | 700   | 32,236 | 2.6%      | 75    | 437   | 917   | 34,041 |
| R78 - Findings of drugs & other substances    | 0.7%     | 1   | 9   | 9   | 1,352 | 1.0%          | 45  | 237   | 318   | 32,847 | 1.5%      | 74    | 353   | 515   | 34,528 |
| R79 - Other abnormal findings of blood        | 1.3%     | 3   | 17  | 17  | 1,334 | 2.9%          | 130 | 976   | 936   | 31,405 | 5.5%      | 272   | 1,446 | 1,846 | 31,906 |
| R91 - Abnormal findings on imaging of lung    | 6.2%     | 19  | 28  | 82  | 1,242 | 12.1%         | 343 | 814   | 3,913 | 28,377 | 13.7%     | 639   | 1,473 | 4,565 | 28,793 |
| T38 - Adverse effects hormones, NEC           | 0.2%     | 1   | 0   | 3   | 1,367 | 0.3%          | 5   | 69    | 88    | 33,285 | 0.4%      | 8     | 75    | 148   | 35,239 |
| Z20 - Exposure to communicable diseases       | 18.5%    | 1   | 16  | 251 | 1,103 | 19.9%         | 107 | 386   | 6,551 | 26,403 | 14.9%     | 66    | 143   | 5,241 | 30,020 |
| Z29 - Other prophylactic measures             | 0.1%     | 2   | 16  | 2   | 1,351 | 0.2%          | 10  | 74    | 53    | 33,310 | 0.6%      | 20    | 68    | 197   | 35,185 |
| Z37 - Outcome of delivery                     | 0.2%     | 1   | 0   | 3   | 1,367 | 0.7%          | 1   | 72    | 227   | 33,147 | 0.0%      | 0     | 0     | 0     | 35,470 |
| Z45 - Management of implanted device          | 1.0%     | 7   | 21  | 14  | 1,329 | 2.6%          | 95  | 408   | 869   | 32,075 | 3.0%      | 88    | 592   | 1,048 | 33,742 |
| Z46 - Fitting/adjustment of other devices     | 1.3%     | 8   | 14  | 17  | 1,332 | 3.4%          | 45  | 292   | 1,124 | 31,986 | 4.1%      | 80    | 459   | 1,443 | 33,488 |
| Z51 - Encounter for other medical care        | 0.7%     | 17  | 14  | 9   | 1,331 | 1.6%          | 142 | 715   | 518   | 32,072 | 5.8%      | 354   | 1,024 | 1,985 | 32,107 |
| Z66 - Do not resuscitate                      | 0.1%     | 1   | 0   | 1   | 1,369 | 0.6%          | 5   | 44    | 207   | 33,191 | 5.0%      | 128   | 309   | 1,738 | 33,295 |
| Z74 - Problems of provider dependency         | 1.8%     | 9   | 17  | 24  | 1,321 | 3.9%          | 509 | 898   | 1,242 | 30,798 | 9.7%      | 1,574 | 2,460 | 3,050 | 28,386 |
| Z99 - Dependence on devices, NEC              | 1.6%     | 16  | 10  | 21  | 1,324 | 4.9%          | 869 | 739   | 1,547 | 30,292 | 9.9%      | 1,285 | 1,283 | 3,261 | 29,641 |

**eTable 8. Risks of candidate COVID-19 complications, by sex**

Risk, A, B, C, and D are defined in eFigure 3.

| eTable 8 / Code                                | Male  |       |       |       |        | Female |       |       |       |        |
|------------------------------------------------|-------|-------|-------|-------|--------|--------|-------|-------|-------|--------|
|                                                | Risk  | A     | B     | C     | D      | Risk   | A     | B     | C     | D      |
| A41 - Other sepsis                             | 12.5% | 392   | 819   | 3,607 | 25,224 | 8.9%   | 324   | 837   | 3,394 | 34,658 |
| B33 - Other viral diseases, NEC                | 0.3%  | 3     | 7     | 77    | 29,955 | 0.2%   | 0     | 9     |       | 39,107 |
| B34 - Viral infection of unspecified site      | 10.1% | 62    | 302   | 2,983 | 26,695 | 9.2%   | 88    | 467   | 3,563 | 35,095 |
| B96 - Other bacterial agents, CE               | 2.1%  | 54    | 453   | 626   | 28,909 | 2.2%   | 97    | 716   | 843   | 37,557 |
| B99 - Other infectious diseases                | 0.5%  | 3     | 75    | 162   | 29,802 | 0.6%   | 8     | 60    | 232   | 38,913 |
| D61 - Other aplastic anemias / bone marrow     | 0.7%  | 58    | 138   | 210   | 29,636 | 0.4%   | 57    | 112   | 167   | 38,877 |
| D65 - Disseminated intravascular coagulation   | 0.2%  | 0     | 1     | 46    | 29,995 | 0.1%   | 0     | 5     | 25    | 39,183 |
| D69 - Purpura/other hemorrhagic conditions     | 2.5%  | 164   | 486   | 726   | 28,666 | 1.6%   | 163   | 406   | 622   | 38,022 |
| D72 - Other disorders of white blood cells     | 4.5%  | 152   | 759   | 1,322 | 27,809 | 3.5%   | 149   | 836   | 1,350 | 36,878 |
| E43 - Unspecified severe malnutrition          | 1.3%  | 98    | 196   | 377   | 29,371 | 1.0%   | 87    | 172   | 406   | 38,548 |
| E46 - Unspecified malnutrition                 | 1.0%  | 112   | 237   | 289   | 29,404 | 1.0%   | 102   | 281   | 391   | 38,439 |
| G72 - Other & unspecified myopathies           | 0.5%  | 16    | 58    | 149   | 29,819 | 0.4%   | 12    | 51    | 143   | 39,007 |
| G92 - Toxic encephalopathy                     | 0.9%  | 16    | 145   | 280   | 29,601 | 0.8%   | 25    | 188   | 300   | 38,700 |
| G93 - Other disorders of brain                 | 5.4%  | 376   | 831   | 1,568 | 27,267 | 4.5%   | 401   | 880   | 1,715 | 36,217 |
| I21 - Acute myocardial infarction              | 2.1%  | 121   | 412   | 624   | 28,885 | 1.5%   | 124   | 354   | 590   | 38,145 |
| I24 - Other acute ischemic heart diseases      | 0.8%  | 28    | 132   | 227   | 29,655 | 0.5%   | 16    | 107   | 200   | 38,890 |
| I26 - Pulmonary embolism                       | 1.1%  | 82    | 186   | 330   | 29,444 | 1.0%   | 108   | 239   | 374   | 38,492 |
| I40 - Acute myocarditis                        | 0.1%  | 0     | 5     | 19    | 30,018 | 0.1%   | 0     | 1     | 28    | 39,184 |
| I45 - Other conduction disorders               | 1.7%  | 86    | 350   | 497   | 29,109 | 1.0%   | 59    | 281   | 379   | 38,494 |
| I46 - Cardiac arrest                           | 1.4%  | 18    | 46    | 417   | 29,561 | 0.9%   | 10    | 28    | 354   | 38,821 |
| I48 - Atrial fibrillation & flutter            | 5.7%  | 1,491 | 1,260 | 1,559 | 25,732 | 3.7%   | 1,644 | 1,205 | 1,359 | 35,005 |
| I95 - Hypotension                              | 4.4%  | 245   | 708   | 1,269 | 27,820 | 3.3%   | 212   | 701   | 1,272 | 37,028 |
| J06 - Acute upper respiratory infections       | 5.7%  | 163   | 1,162 | 1,631 | 27,086 | 6.2%   | 272   | 1,868 | 2,287 | 34,786 |
| J12 - Viral pneumonia, NEC                     | 31.0% | 33    | 53    | 9,277 | 20,679 | 25.1%  | 42    | 53    | 9,820 | 29,298 |
| J15 - Bacterial pneumonia, NEC                 | 2.5%  | 45    | 200   | 742   | 29,055 | 1.6%   | 29    | 197   | 618   | 38,369 |
| J16 - Pneumonia due to other organisms         | 0.5%  | 3     | 27    | 141   | 29,871 | 0.4%   | 7     | 21    | 169   | 39,016 |
| J17 - Pneumonia in disease, CE                 | 0.1%  | 1     | 10    | 23    | 30,008 | 0.1%   | 4     | 2     | 23    | 39,184 |
| J18 - Pneumonia, unspecified organism          | 23.4% | 655   | 1,130 | 6,609 | 21,648 | 18.3%  | 700   | 1,229 | 6,807 | 30,477 |
| J22 - Unspecified acute lower resp. infection  | 4.8%  | 4     | 36    | 1,429 | 28,573 | 4.2%   | 4     | 70    | 1,657 | 37,482 |
| J80 - Acute respiratory distress syndrome      | 5.5%  | 8     | 30    | 1,653 | 28,351 | 3.4%   | 12    | 42    | 1,347 | 37,812 |
| J84 - Other interstitial pulmonary diseases    | 0.9%  | 70    | 177   | 258   | 29,537 | 0.7%   | 89    | 216   | 276   | 38,632 |
| J90 - Pleural effusion, NEC                    | 3.3%  | 207   | 624   | 962   | 28,249 | 2.5%   | 211   | 603   | 949   | 37,450 |
| J93 - Pneumothorax & air leak                  | 0.6%  | 5     | 63    | 179   | 29,795 | 0.3%   | 4     | 28    | 126   | 39,055 |
| J95 - Procedural complications of resp. system | 0.5%  | 13    | 80    | 141   | 29,808 | 0.2%   | 7     | 52    | 90    | 39,064 |
| J96 - Respiratory failure, NEC                 | 26.3% | 831   | 632   | 7,530 | 21,049 | 19.8%  | 1,053 | 683   | 7,410 | 30,067 |
| J98 - Other respiratory disorders              | 11.4% | 292   | 964   | 3,274 | 25,512 | 10.1%  | 296   | 1,106 | 3,818 | 33,993 |
| N17 - Acute kidney failure                     | 15.1% | 830   | 1,147 | 4,238 | 23,827 | 9.3%   | 708   | 1,059 | 3,496 | 33,950 |
| O48 - Late pregnancy                           | 0.0%  | 0     | 0     | 0     | 30,042 | 0.1%   | 0     | 8     | 38    | 39,167 |
| O70 - Perineal laceration during delivery      | 0.0%  | 0     | 0     | 0     | 30,042 | 0.1%   | 0     | 14    | 52    | 39,147 |
| O98 - Maternal infectious diseases             | 0.0%  | 0     | 1     | 1     | 30,040 | 0.8%   | 18    | 31    | 307   | 38,857 |
| R00 - Abnormalities of heart beat              | 6.1%  | 250   | 1,296 | 1,731 | 26,765 | 4.9%   | 367   | 1,642 | 1,822 | 35,382 |
| R05 - Cough                                    | 21.7% | 917   | 1,991 | 5,879 | 21,255 | 22.3%  | 1,420 | 2,897 | 7,780 | 27,116 |
| R06 - Abnormalities of breathing               | 27.7% | 1,583 | 2,114 | 7,310 | 19,035 | 25.1%  | 1,988 | 2,559 | 8,697 | 25,969 |
| R09 - Other s/s circulatory/respiratory system | 15.6% | 487   | 1,305 | 4,417 | 23,833 | 12.9%  | 573   | 1,663 | 4,766 | 32,211 |
| R19 - Other s/s digestive system & abdomen     | 3.9%  | 142   | 913   | 1,137 | 27,850 | 4.8%   | 219   | 1,422 | 1,788 | 35,784 |
| R34 - Anuria & oliguria                        | 0.3%  | 1     | 26    | 98    | 29,917 | 0.2%   | 2     | 21    | 79    | 39,111 |

| eTable 8 / Code                               | Male  |       |       |       |        | Female |       |       |       |        |
|-----------------------------------------------|-------|-------|-------|-------|--------|--------|-------|-------|-------|--------|
| R40 - Somnolence, stupor & coma               | 2.1%  | 67    | 482   | 605   | 28,888 | 1.8%   | 73    | 480   | 712   | 37,948 |
| R41 - Other s/s involving cognitive functions | 8.0%  | 856   | 1,790 | 2,190 | 25,206 | 6.9%   | 1,114 | 2,079 | 2,486 | 33,534 |
| R43 - Disturbances of smell & taste           | 0.4%  | 0     | 10    | 127   | 29,905 | 0.7%   | 2     | 19    | 290   | 38,902 |
| R50 - Fever of other & unknown origin         | 24.2% | 508   | 1,001 | 6,915 | 21,618 | 20.7%  | 545   | 1,243 | 7,760 | 29,665 |
| R53 - Malaise & fatigue                       | 13.2% | 1,183 | 2,715 | 3,440 | 22,704 | 12.5%  | 1,578 | 3,633 | 4,239 | 29,763 |
| R57 - Shock, NEC                              | 1.8%  | 16    | 101   | 541   | 29,384 | 1.0%   | 4     | 99    | 405   | 38,705 |
| R62 - Lack of expected normal development     | 1.1%  | 146   | 240   | 340   | 29,316 | 1.1%   | 169   | 303   | 435   | 38,306 |
| R65 - S/s of systemic inflammation/infection  | 6.1%  | 98    | 348   | 1,801 | 27,795 | 4.0%   | 73    | 350   | 1,564 | 37,226 |
| R68 - Other general s/s                       | 6.4%  | 240   | 822   | 1,854 | 27,126 | 5.7%   | 375   | 1,175 | 2,134 | 35,529 |
| R74 - Abnormal serum enzyme levels            | 3.0%  | 65    | 432   | 872   | 28,673 | 1.9%   | 54    | 469   | 744   | 37,946 |
| R78 - Findings of drugs & other substances    | 1.4%  | 75    | 315   | 401   | 29,251 | 1.1%   | 43    | 276   | 425   | 38,469 |
| R79 - Other abnormal findings of blood        | 4.7%  | 206   | 1,163 | 1,358 | 27,315 | 3.7%   | 195   | 1,248 | 1,409 | 36,361 |
| R91 - Abnormal findings on imaging of lung    | 14.7% | 501   | 1,068 | 4,174 | 24,299 | 11.5%  | 489   | 1,218 | 4,295 | 33,211 |
| T38 - Adverse effects hormones, NEC           | 0.4%  | 4     | 66    | 129   | 29,843 | 0.3%   | 10    | 77    | 107   | 39,019 |
| Z20 - Exposure to communicable diseases       | 16.9% | 79    | 251   | 5,023 | 24,689 | 17.7%  | 94    | 288   | 6,858 | 31,973 |
| Z29 - Other prophylactic measures             | 0.4%  | 10    | 67    | 121   | 29,844 | 0.3%   | 22    | 90    | 129   | 38,972 |
| Z37 - Outcome of delivery                     | 0.0%  | 1     | 0     | 0     | 30,041 | 0.6%   | 1     | 72    | 229   | 38,911 |
| Z45 - Management of implanted device          | 3.6%  | 99    | 536   | 1,052 | 28,355 | 2.2%   | 90    | 475   | 856   | 37,792 |
| Z46 - Fitting/adjustment of other devices     | 4.9%  | 67    | 422   | 1,445 | 28,108 | 2.9%   | 66    | 337   | 1,112 | 37,698 |
| Z51 - Encounter for other medical care        | 4.2%  | 224   | 774   | 1,217 | 27,827 | 3.3%   | 285   | 963   | 1,269 | 36,696 |
| Z66 - Do not resuscitate                      | 3.0%  | 48    | 115   | 901   | 28,978 | 2.6%   | 83    | 234   | 1,023 | 37,873 |
| Z74 - Problems of provider dependency         | 7.1%  | 921   | 1,508 | 1,971 | 25,642 | 6.3%   | 1,131 | 1,834 | 2,276 | 33,972 |
| Z99 - Dependence on devices, NEC              | 8.5%  | 1,035 | 919   | 2,374 | 25,714 | 6.5%   | 1,102 | 1,091 | 2,396 | 34,624 |

**eTable 9. Risks of candidate COVID-19 complications, by hospitalization status**

Risk, A, B, C, and D are defined in eFigure 3.

| eTable 9 / Code                                | Outpatient |       |       |       |        | Inpatient |       |       |        |        | ICU   |     |     |       |       |
|------------------------------------------------|------------|-------|-------|-------|--------|-----------|-------|-------|--------|--------|-------|-----|-----|-------|-------|
|                                                | Risk       | A     | B     | C     | D      | Risk      | A     | B     | C      | D      | Risk  | A   | B   | C     | D     |
| A41 - Other sepsis                             | 1.2%       | 54    | 517   | 401   | 31,773 | 18.7%     | 673   | 1,159 | 6,685  | 29,026 | 54.1% | 116 | 50  | 1,679 | 1,424 |
| B33 - Other viral diseases, NEC                | 0.2%       | 1     | 8     | 69    | 32,667 | 0.3%      | 2     | 8     | 105    | 37,428 | 1.1%  | 1   | 1   | 35    | 3,232 |
| B34 - Viral infection of unspecified site      | 8.3%       | 77    | 540   | 2,667 | 29,461 | 10.6%     | 73    | 241   | 3,945  | 33,284 | 17.8% | 9   | 24  | 576   | 2,660 |
| B96 - Other bacterial agents, CE               | 1.1%       | 20    | 413   | 342   | 31,970 | 3.1%      | 132   | 777   | 1,147  | 35,487 | 7.1%  | 26  | 83  | 223   | 2,937 |
| B99 - Other infectious diseases                | 0.3%       | 2     | 42    | 110   | 32,591 | 0.8%      | 9     | 93    | 287    | 37,154 | 0.9%  | 2   | 5   | 28    | 3,234 |
| D61 - Other aplastic anemias / bone marrow     | 0.1%       | 12    | 68    | 27    | 32,638 | 0.9%      | 103   | 186   | 353    | 36,901 | 2.8%  | 12  | 22  | 91    | 3,144 |
| D65 - Disseminated intravascular coagulation   | 0.0%       | 0     | 2     | 1     | 32,742 | 0.2%      | 0     | 4     | 70     | 37,469 | 0.9%  | 0   | 1   | 31    | 3,237 |
| D69 - Purpura/other hemorrhagic conditions     | 0.3%       | 34    | 266   | 101   | 32,344 | 3.4%      | 297   | 630   | 1,261  | 35,355 | 11.7% | 43  | 73  | 368   | 2,785 |
| D72 - Other disorders of white blood cells     | 0.8%       | 46    | 528   | 269   | 31,902 | 6.7%      | 257   | 1,090 | 2,435  | 33,761 | 19.4% | 42  | 94  | 607   | 2,526 |
| E43 - Unspecified severe malnutrition          | 0.1%       | 14    | 79    | 24    | 32,628 | 2.1%      | 174   | 295   | 764    | 36,310 | 6.2%  | 24  | 26  | 201   | 3,018 |
| E46 - Unspecified malnutrition                 | 0.1%       | 27    | 145   | 35    | 32,538 | 1.8%      | 192   | 378   | 656    | 36,317 | 4.6%  | 13  | 27  | 147   | 3,082 |
| G72 - Other & unspecified myopathies           | 0.0%       | 6     | 24    | 15    | 32,700 | 0.7%      | 23    | 85    | 279    | 37,156 | 2.4%  | 5   | 4   | 77    | 3,183 |
| G92 - Toxic encephalopathy                     | 0.0%       | 2     | 67    | 14    | 32,662 | 1.5%      | 40    | 271   | 571    | 36,661 | 7.1%  | 10  | 39  | 229   | 2,991 |
| G93 - Other disorders of brain                 | 0.7%       | 86    | 518   | 223   | 31,918 | 8.7%      | 701   | 1,207 | 3,105  | 32,530 | 24.9% | 93  | 87  | 769   | 2,320 |
| I21 - Acute myocardial infarction              | 0.3%       | 28    | 192   | 89    | 32,436 | 3.1%      | 221   | 581   | 1,139  | 35,602 | 8.1%  | 32  | 62  | 257   | 2,918 |
| I24 - Other acute ischemic heart diseases      | 0.1%       | 4     | 45    | 17    | 32,679 | 1.1%      | 40    | 196   | 414    | 36,893 | 4.4%  | 7   | 30  | 142   | 3,090 |
| I26 - Pulmonary embolism                       | 0.3%       | 42    | 144   | 100   | 32,459 | 1.6%      | 153   | 283   | 609    | 36,498 | 3.1%  | 9   | 30  | 99    | 3,131 |
| I40 - Acute myocarditis                        | 0.0%       | 0     | 0     | 1     | 32,744 | 0.1%      | 0     | 6     | 48     | 37,489 | 0.5%  | 0   | 0   | 16    | 3,253 |
| I45 - Other conduction disorders               | 0.3%       | 18    | 190   | 98    | 32,439 | 2.1%      | 133   | 450   | 793    | 36,167 | 5.3%  | 24  | 51  | 169   | 3,025 |
| I46 - Cardiac arrest                           | 0.4%       | 3     | 15    | 116   | 32,611 | 1.8%      | 25    | 60    | 666    | 36,792 | 6.6%  | 3   | 6   | 216   | 3,044 |
| I48 - Atrial fibrillation & flutter            | 1.2%       | 583   | 945   | 372   | 30,845 | 7.8%      | 2,595 | 1,544 | 2,601  | 30,803 | 16.1% | 310 | 71  | 465   | 2,423 |
| I95 - Hypotension                              | 1.1%       | 75    | 423   | 354   | 31,893 | 6.1%      | 391   | 1,009 | 2,218  | 33,925 | 17.3% | 49  | 81  | 542   | 2,597 |
| J06 - Acute upper respiratory infections       | 7.2%       | 278   | 1,971 | 2,193 | 28,303 | 4.9%      | 162   | 1,098 | 1,776  | 34,507 | 9.1%  | 27  | 117 | 285   | 2,840 |
| J12 - Viral pneumonia, NEC                     | 8.1%       | 13    | 45    | 2,663 | 30,024 | 44.6%     | 62    | 64    | 16,699 | 20,718 | 81.0% | 10  | 3   | 2,636 | 620   |
| J15 - Bacterial pneumonia, NEC                 | 0.3%       | 10    | 121   | 114   | 32,500 | 3.4%      | 67    | 277   | 1,262  | 35,937 | 12.2% | 11  | 17  | 396   | 2,845 |
| J16 - Pneumonia due to other organisms         | 0.2%       | 2     | 15    | 68    | 32,660 | 0.7%      | 8     | 35    | 245    | 37,255 | 1.6%  | 0   | 3   | 53    | 3,213 |
| J17 - Pneumonia in diseases, CE                | 0.0%       | 1     | 6     | 10    | 32,728 | 0.1%      | 4     | 6     | 36     | 37,497 | 0.1%  | 1   | 1   | 3     | 3,264 |
| J18 - Pneumonia, unspecified organism          | 7.3%       | 202   | 933   | 2,305 | 29,305 | 32.3%     | 1,168 | 1,458 | 11,286 | 23,631 | 52.4% | 139 | 91  | 1,593 | 1,446 |
| J22 - Unspecified acute lower resp. infection  | 3.4%       | 5     | 55    | 1,100 | 31,585 | 5.4%      | 4     | 53    | 2,007  | 35,479 | 8.8%  | 0   | 9   | 287   | 2,973 |
| J80 - Acute respiratory distress syndrome      | 0.7%       | 3     | 20    | 235   | 32,487 | 7.5%      | 17    | 53    | 2,802  | 34,671 | 26.0% | 3   | 4   | 849   | 2,413 |
| J84 - Other interstitial pulmonary diseases    | 0.3%       | 29    | 119   | 99    | 32,498 | 1.2%      | 133   | 280   | 445    | 36,685 | 2.0%  | 18  | 30  | 65    | 3,156 |
| J90 - Pleural effusion, NEC                    | 0.5%       | 44    | 345   | 168   | 32,188 | 4.9%      | 381   | 892   | 1,764  | 34,506 | 11.3% | 56  | 71  | 356   | 2,786 |
| J93 - Pneumothorax & air leak                  | 0.0%       | 0     | 32    | 8     | 32,705 | 0.8%      | 9     | 60    | 303    | 37,171 | 2.6%  | 2   | 12  | 84    | 3,171 |
| J95 - Procedural complications of resp. system | 0.0%       | 4     | 27    | 8     | 32,706 | 0.6%      | 16    | 109   | 226    | 37,192 | 3.3%  | 1   | 14  | 106   | 3,148 |
| J96 - Respiratory failure, NEC                 | 3.6%       | 191   | 525   | 1,148 | 30,881 | 40.0%     | 1,730 | 807   | 13,985 | 21,021 | 75.3% | 253 | 31  | 2,248 | 737   |
| J98 - Other respiratory disorders              | 7.1%       | 93    | 712   | 2,282 | 29,658 | 13.7%     | 504   | 1,379 | 4,896  | 30,764 | 24.7% | 85  | 130 | 753   | 2,301 |
| N17 - Acute kidney failure                     | 1.5%       | 135   | 696   | 486   | 31,428 | 21.2%     | 1,423 | 1,544 | 7,347  | 27,229 | 50.7% | 245 | 78  | 1,495 | 1,451 |
| O48 - Late pregnancy                           | 0.0%       | 0     | 7     | 1     | 32,737 | 0.1%      | 0     | 1     | 37     | 37,505 | 0.0%  | 0   | 0   | 0     | 3,269 |
| O70 - Perineal laceration during delivery      | 0.0%       | 0     | 13    | 0     | 32,732 | 0.1%      | 0     | 1     | 52     | 37,490 | 0.0%  | 0   | 0   | 0     | 3,269 |
| O98 - Maternal infectious diseases             | 0.3%       | 5     | 22    | 97    | 32,621 | 0.6%      | 13    | 10    | 218    | 37,302 | 0.3%  | 0   | 3   | 9     | 3,257 |
| R00 - Abnormalities of heart beat              | 2.8%       | 144   | 1,208 | 875   | 30,518 | 7.7%      | 479   | 1,771 | 2,721  | 32,572 | 18.3% | 72  | 181 | 551   | 2,465 |
| R05 - Cough                                    | 24.3%      | 1,249 | 2,387 | 7,063 | 22,046 | 20.0%     | 1,101 | 2,578 | 6,775  | 27,089 | 30.5% | 162 | 197 | 887   | 2,023 |
| R06 - Abnormalities of breathing               | 18.3%      | 913   | 2,012 | 5,447 | 24,373 | 33.5%     | 2,694 | 2,729 | 10,755 | 21,365 | 55.0% | 412 | 170 | 1,477 | 1,210 |
| R09 - Other s/s circulatory/respiratory system | 6.6%       | 235   | 1,326 | 2,048 | 29,136 | 20.7%     | 836   | 1,675 | 7,248  | 27,784 | 34.3% | 112 | 134 | 1,037 | 1,986 |
| R19 - Other s/s digestive system & abdomen     | 3.3%       | 106   | 1,010 | 1,028 | 30,601 | 5.4%      | 262   | 1,351 | 1,942  | 33,988 | 10.8% | 35  | 119 | 335   | 2,780 |

| eTable 9 / Code                               | Outpatient |     |       |       |        | Inpatient |       |       |       |        | ICU   |     |     |       |       |
|-----------------------------------------------|------------|-----|-------|-------|--------|-----------|-------|-------|-------|--------|-------|-----|-----|-------|-------|
| R34 - Anuria & oliguria                       | 0.0%       | 0   | 13    | 10    | 32,722 | 0.5%      | 3     | 34    | 169   | 37,337 | 1.5%  | 0   | 3   | 50    | 3,216 |
| R40 - Somnolence, stupor & coma               | 0.7%       | 26  | 292   | 240   | 32,187 | 3.0%      | 116   | 685   | 1,094 | 35,648 | 5.9%  | 14  | 65  | 189   | 3,001 |
| R41 - Other s/s involving cognitive functions | 2.6%       | 313 | 1,272 | 802   | 30,358 | 11.8%     | 1,674 | 2,646 | 3,927 | 29,296 | 16.4% | 136 | 172 | 486   | 2,475 |
| R43 - Disturbances of smell & taste           | 1.1%       | 2   | 18    | 373   | 32,352 | 0.1%      | 0     | 11    | 51    | 37,481 | 0.1%  | 0   | 0   | 3     | 3,266 |
| R50 - Fever of other & unknown origin         | 17.8%      | 384 | 1,153 | 5,540 | 25,668 | 26.0%     | 682   | 1,121 | 9,292 | 26,448 | 35.0% | 64  | 65  | 1,100 | 2,040 |
| R53 - Malaise & fatigue                       | 8.8%       | 735 | 2,482 | 2,608 | 26,920 | 16.4%     | 2,065 | 3,942 | 5,173 | 26,363 | 25.4% | 231 | 278 | 701   | 2,059 |
| R57 - Shock, NEC                              | 0.1%       | 0   | 47    | 32    | 32,666 | 2.5%      | 20    | 154   | 924   | 36,445 | 9.5%  | 2   | 21  | 308   | 2,938 |
| R62 - Lack of expected normal development     | 0.4%       | 73  | 196   | 134   | 32,342 | 1.8%      | 246   | 351   | 651   | 36,295 | 2.8%  | 28  | 40  | 89    | 3,112 |
| R65 - S/s of systemic inflammation/infection  | 0.4%       | 10  | 175   | 124   | 32,436 | 8.9%      | 163   | 530   | 3,279 | 33,571 | 34.4% | 49  | 35  | 1,096 | 2,089 |
| R68 - Other general s/s                       | 4.4%       | 222 | 1,031 | 1,394 | 30,098 | 7.3%      | 394   | 993   | 2,648 | 33,508 | 11.9% | 51  | 108 | 370   | 2,740 |
| R74 - Abnormal serum enzyme levels            | 0.5%       | 22  | 338   | 155   | 32,230 | 4.0%      | 100   | 572   | 1,472 | 35,399 | 10.6% | 13  | 57  | 338   | 2,861 |
| R78 - Findings of drugs & other substances    | 0.2%       | 12  | 163   | 55    | 32,515 | 2.1%      | 108   | 436   | 787   | 36,212 | 4.0%  | 11  | 46  | 127   | 3,085 |
| R79 - Other abnormal findings of blood        | 1.6%       | 103 | 898   | 503   | 31,241 | 6.4%      | 302   | 1,541 | 2,296 | 33,404 | 14.3% | 50  | 163 | 436   | 2,620 |
| R91 - Abnormal findings on imaging of lung    | 4.7%       | 158 | 845   | 1,505 | 30,237 | 20.0%     | 843   | 1,470 | 7,055 | 28,175 | 34.6% | 115 | 111 | 1,052 | 1,991 |
| T38 - Adverse effects hormones, NEC           | 0.0%       | 1   | 33    | 8     | 32,703 | 0.6%      | 13    | 111   | 231   | 37,188 | 3.7%  | 1   | 26  | 120   | 3,122 |
| Z20 - Exposure to communicable diseases       | 18.9%      | 108 | 383   | 6,083 | 26,171 | 16.0%     | 66    | 162   | 5,960 | 31,355 | 22.8% | 4   | 9   | 741   | 2,515 |
| Z29 - Other prophylactic measures             | 0.3%       | 5   | 77    | 84    | 32,579 | 0.4%      | 27    | 81    | 168   | 37,267 | 0.2%  | 2   | 6   | 7     | 3,254 |
| Z37 - Outcome of delivery                     | 0.0%       | 0   | 60    | 3     | 32,682 | 0.6%      | 2     | 12    | 227   | 37,302 | 0.2%  | 0   | 3   | 7     | 3,259 |
| Z45 - Management of implanted device          | 0.5%       | 24  | 294   | 147   | 32,280 | 4.9%      | 166   | 727   | 1,784 | 34,866 | 12.9% | 24  | 63  | 412   | 2,770 |
| Z46 - Fitting/adjustment of other devices     | 0.6%       | 13  | 235   | 182   | 32,315 | 6.5%      | 120   | 530   | 2,402 | 34,491 | 17.9% | 18  | 48  | 574   | 2,629 |
| Z51 - Encounter for other medical care        | 0.7%       | 119 | 582   | 240   | 31,804 | 6.3%      | 394   | 1,171 | 2,272 | 33,706 | 19.7% | 56  | 103 | 612   | 2,498 |
| Z66 - Do not resuscitate                      | 0.1%       | 5   | 93    | 43    | 32,604 | 5.1%      | 129   | 260   | 1,903 | 35,251 | 25.0% | 27  | 14  | 808   | 2,420 |
| Z74 - Problems of provider dependency         | 3.4%       | 384 | 1,011 | 1,051 | 30,299 | 9.8%      | 1,708 | 2,364 | 3,265 | 30,206 | 10.2% | 96  | 143 | 310   | 2,720 |
| Z99 - Dependence on devices, NEC              | 2.5%       | 336 | 575   | 791   | 31,043 | 11.8%     | 1,834 | 1,457 | 4,038 | 30,214 | 24.5% | 244 | 97  | 717   | 2,211 |



**eTable 10. Sensitivity analysis (38-day baseline period)**

To assess the impact of the duration of the baseline period, we performed a sensitivity analysis where the baseline period was defined as days 68 through 30 before index (i.e., 38 days in duration, identical in length to the hazard period). Results with OR > 1 and P < 0.05 are shown below. OR (Est.): odds ratio for association with COVID-19, point estimate. OR (LI) and OR (UI): 95% lower and upper confidence intervals for the odds ratio. OR, Risk, A, B, C, and D are defined in eFigure 3. P-value: from McNemar test (null hypothesis: OR = 1). The Bonferroni-corrected significance threshold was 0.05/1,724 = 2.9E-05.

*Authors' interpretation:* All 69 ICD-10 codes identified in the primary analysis were also identified in this sensitivity analysis. Numerous additional codes were also identified, many of which are chronic conditions (e.g., G30 - Alzheimer's disease; OR: 1.32, 95% CI: 1.20-1.46, Q90 - Down Syndrome; OR: 4.64, 95% CI: 2.44-8.80) that are unlikely to have been true complications caused by COVID-19. This suggests that a 38-day baseline period is insufficient time to identify pre-existing chronic condition, since a patient who has a disease such as Alzheimer's disease or Down Syndrome may not have a healthcare encounter related to these conditions within this relatively short time period. This supports the use of the longer (120 day) baseline period in the primary analysis. However, some conditions that may have been acute events (e.g., I82 – Other venous embolism and thrombosis; OR: 1.74, 95% CI: 1.58-1.93) were also identified using this approach, suggesting that the primary analysis may have lower sensitivity to detect acute conditions that could be moderately associated with COVID-19.

Green shading: The 69 ICD-10 codes that were also identified in the primary analysis (i.e., Bonferroni significant in both this sensitivity analysis and the primary analysis). White shading: ICD-10 codes that were Bonferroni-significant in this sensitivity analysis but not in the primary analysis. Gray shading: nominally significant codes in this sensitivity analysis (P < 0.05 but not < Bonferroni-corrected threshold).

| eTable 10 / Code                                                | OR (Est.) | OR (LI) | OR (UI) | Risk  | A     | B     | C     | D      | P-value   |
|-----------------------------------------------------------------|-----------|---------|---------|-------|-------|-------|-------|--------|-----------|
| A04 - Other bacterial intestinal infections                     | 1.44      | 1.21    | 1.72    | 0.4%  | 88    | 206   | 297   | 69,697 | 6.00E-05  |
| A08 - Viral & other intestinal infections                       | 2.27      | 1.81    | 2.84    | 0.4%  | 9     | 109   | 247   | 69,923 | 3.84E-13  |
| A09 - Infectious gastroenteritis and colitis, unspecified       | 2.52      | 1.82    | 3.49    | 0.2%  | 4     | 50    | 126   | 70,108 | 1.57E-08  |
| A37 - Whooping cough                                            | 4.00      | 1.08    | 22.09   | 0.0%  | 0     | 3     | 12    | 70,273 | 3.52E-02  |
| A40 - Streptococcal sepsis                                      | 1.59      | 1.06    | 2.40    | 0.1%  | 6     | 37    | 59    | 70,186 | 3.21E-02  |
| A41 - Other sepsis                                              | 7.57      | 7.08    | 8.09    | 10.6% | 532   | 962   | 7,281 | 61,513 | 0.00E+00  |
| A49 - Bacterial infection of unspecified site                   | 1.60      | 1.33    | 1.91    | 0.4%  | 39    | 191   | 305   | 69,753 | 3.90E-07  |
| A78 - Q fever                                                   | 5.00      | 1.07    | 46.93   | 0.0%  | 1     | 2     | 10    | 70,275 | 3.86E-02  |
| A87 - Viral meningitis                                          | 8.00      | 1.07    | 354.98  | 0.0%  | 0     | 1     | 8     | 70,279 | 3.91E-02  |
| B09 - Unspecified viral infection characterized by skin and ... | 3.17      | 1.30    | 7.70    | 0.0%  | 0     | 6     | 19    | 70,263 | 1.64E-02  |
| B20 - Human immunodeficiency virus [HIV] disease                | 1.53      | 1.21    | 1.92    | 0.3%  | 181   | 120   | 183   | 69,804 | 3.68E-04  |
| B33 - Other viral diseases, NEC                                 | 43.75     | 16.84   | 113.63  | 0.2%  | 2     | 4     | 175   | 70,107 | 5.45E-37  |
| B34 - Viral infection of unspecified site                       | 16.46     | 14.89   | 18.20   | 9.6%  | 95    | 405   | 6,667 | 63,121 | 0.00E+00  |
| B37 - Candidiasis                                               | 1.49      | 1.32    | 1.69    | 0.9%  | 75    | 415   | 619   | 69,179 | 2.74E-10  |
| B49 - Unspecified mycosis                                       | 2.81      | 1.60    | 4.94    | 0.1%  | 1     | 16    | 45    | 70,226 | 3.37E-04  |
| B87 - Myiasis                                                   | 14.00     | 2.13    | 591.97  | 0.0%  | 0     | 1     | 14    | 70,273 | 9.77E-04  |
| B95 - Strep., Staph., & Enterococcus                            | 1.90      | 1.65    | 2.19    | 0.8%  | 76    | 295   | 561   | 69,356 | 1.33E-19  |
| B96 - Other bacterial agents, CE                                | 2.66      | 2.42    | 2.93    | 2.2%  | 98    | 579   | 1,543 | 68,068 | 4.81E-97  |
| B99 - Other infectious diseases                                 | 5.51      | 4.29    | 7.06    | 0.6%  | 6     | 73    | 402   | 69,807 | 3.47E-51  |
| C34 - Malignant neoplasm of bronchus and lung                   | 1.36      | 1.06    | 1.75    | 0.2%  | 204   | 105   | 143   | 69,836 | 1.88E-02  |
| C91 - Lymphoid leukemia                                         | 2.16      | 1.47    | 3.16    | 0.1%  | 103   | 38    | 82    | 70,065 | 8.66E-05  |
| D53 - Other nutritional anemias                                 | 1.42      | 1.13    | 1.79    | 0.3%  | 62    | 124   | 176   | 69,926 | 3.23E-03  |
| D61 - Other aplastic anemias / bone marrow                      | 2.88      | 2.38    | 3.49    | 0.6%  | 92    | 140   | 403   | 69,653 | 2.49E-29  |
| D62 - Acute posthemorrhagic anemia                              | 1.45      | 1.27    | 1.67    | 0.7%  | 77    | 346   | 503   | 69,362 | 8.61E-08  |
| D63 - Anemia in chronic diseases, CE                            | 1.30      | 1.20    | 1.40    | 2.2%  | 998   | 1,150 | 1,495 | 66,645 | 2.25E-11  |
| D64 - Other anemias                                             | 1.43      | 1.36    | 1.50    | 6.0%  | 1,805 | 2,741 | 3,915 | 61,827 | 7.14E-47  |
| D65 - Disseminated intravascular coagulation                    | 11.83     | 5.26    | 26.62   | 0.1%  | 0     | 6     | 71    | 70,211 | 3.02E-13  |
| D68 - Other coagulation defects                                 | 2.05      | 1.79    | 2.36    | 0.9%  | 122   | 300   | 616   | 69,250 | 2.28E-25  |
| D69 - Purpura/other hemorrhagic conditions                      | 2.99      | 2.70    | 3.31    | 2.1%  | 234   | 488   | 1,459 | 68,107 | 4.18E-107 |

| eTable 10 / Code                                               | OR (Est.) | OR (LI) | OR (UI) | Risk  | A      | B     | C      | D      | P-value   |
|----------------------------------------------------------------|-----------|---------|---------|-------|--------|-------|--------|--------|-----------|
| D70 - Neutropenia                                              | 2.11      | 1.70    | 2.62    | 0.4%  | 55     | 119   | 251    | 69,863 | 9.74E-12  |
| D72 - Other disorders of white blood cells                     | 3.30      | 3.06    | 3.57    | 4.0%  | 216    | 845   | 2,791  | 66,436 | 2.92E-228 |
| D76 - Other specified diseases with ... lymphoreticular ...    | 10.00     | 1.42    | 433.98  | 0.0%  | 0      | 1     | 10     | 70,277 | 1.17E-02  |
| D84 - Other immunodeficiencies                                 | 1.79      | 1.23    | 2.60    | 0.1%  | 16     | 42    | 75     | 70,155 | 3.09E-03  |
| D86 - Sarcoidosis                                              | 2.12      | 1.51    | 2.98    | 0.1%  | 69     | 49    | 104    | 70,066 | 1.27E-05  |
| D89 - Other disorders involving the immune mechanism, NEC      | 2.31      | 1.81    | 2.97    | 0.3%  | 47     | 89    | 206    | 69,946 | 1.44E-11  |
| E03 - Other hypothyroidism                                     | 1.20      | 1.13    | 1.27    | 3.8%  | 1,905  | 2,085 | 2,498  | 63,800 | 1.16E-09  |
| E09 - Drug or chemical induced diabetes mellitus               | 2.33      | 1.41    | 3.87    | 0.1%  | 5      | 21    | 49     | 70,213 | 1.25E-03  |
| E11 - Type 2 diabetes mellitus                                 | 1.47      | 1.41    | 1.52    | 12.0% | 8,815  | 4,652 | 6,817  | 50,004 | 8.55E-91  |
| E16 - Other disorders of pancreatic internal secretion         | 1.89      | 1.59    | 2.24    | 0.5%  | 36     | 202   | 382    | 69,668 | 1.29E-13  |
| E22 - Hyperfunction of pituitary gland                         | 2.01      | 1.50    | 2.70    | 0.2%  | 15     | 67    | 135    | 70,071 | 2.43E-06  |
| E43 - Unspecified severe malnutrition                          | 3.83      | 3.30    | 4.46    | 1.2%  | 163    | 212   | 813    | 69,100 | 2.30E-78  |
| E44 - Malnutrition (moderate & mild)                           | 2.19      | 1.90    | 2.53    | 0.8%  | 135    | 270   | 592    | 69,291 | 7.99E-28  |
| E46 - Unspecified malnutrition                                 | 2.53      | 2.21    | 2.90    | 1.0%  | 189    | 285   | 721    | 69,093 | 8.28E-43  |
| E56 - Other vitamin deficiencies                               | 1.38      | 1.11    | 1.70    | 0.3%  | 82     | 146   | 201    | 69,859 | 3.75E-03  |
| E63 - Other nutritional deficiencies                           | 1.65      | 1.13    | 2.41    | 0.1%  | 16     | 43    | 71     | 70,158 | 1.14E-02  |
| E66 - Overweight and obesity                                   | 1.14      | 1.08    | 1.19    | 5.2%  | 1,602  | 3,012 | 3,421  | 62,253 | 3.64E-07  |
| E78 - Disorders of lipoprotein metabolism and other lipidemias | 1.10      | 1.06    | 1.13    | 12.7% | 5,074  | 6,756 | 7,413  | 51,045 | 3.57E-08  |
| E87 - Other fluid, electrolyte disorders                       | 1.97      | 1.71    | 2.26    | 0.8%  | 71     | 298   | 586    | 69,333 | 4.78E-22  |
| F02 - Dementia in other diseases, CE                           | 1.26      | 1.15    | 1.37    | 1.7%  | 832    | 911   | 1,146  | 67,399 | 2.48E-07  |
| F03 - Unspecified dementia                                     | 1.62      | 1.52    | 1.72    | 4.3%  | 2,386  | 1,744 | 2,821  | 63,337 | 4.22E-57  |
| F05 - Delirium due to physiological condition                  | 2.01      | 1.68    | 2.41    | 0.5%  | 31     | 179   | 360    | 69,718 | 8.96E-15  |
| F32 - Major depressive disorder, single episode                | 1.07      | 1.02    | 1.14    | 3.8%  | 1,561  | 2,343 | 2,517  | 63,867 | 1.31E-02  |
| F41 - Other anxiety disorders                                  | 1.16      | 1.10    | 1.22    | 5.1%  | 2,157  | 2,895 | 3,347  | 61,889 | 1.14E-08  |
| F81 - Specific developmental disorders of scholastic skills    | 2.42      | 1.25    | 4.68    | 0.0%  | 6      | 12    | 29     | 70,241 | 1.25E-02  |
| G03 - Meningitis due to other and unspecified causes           | 2.73      | 1.38    | 5.37    | 0.0%  | 1      | 11    | 30     | 70,246 | 4.94E-03  |
| G04 - Encephalitis, myelitis and encephalomyelitis             | 2.53      | 1.41    | 4.57    | 0.1%  | 6      | 15    | 38     | 70,229 | 2.51E-03  |
| G20 - Parkinson's disease                                      | 1.34      | 1.16    | 1.56    | 0.6%  | 678    | 311   | 418    | 68,881 | 8.64E-05  |
| G30 - Alzheimer's disease                                      | 1.32      | 1.20    | 1.46    | 1.4%  | 975    | 715   | 946    | 67,652 | 1.67E-08  |
| G40 - Epilepsy and recurrent seizures                          | 1.42      | 1.29    | 1.57    | 1.4%  | 849    | 687   | 976    | 67,776 | 1.64E-12  |
| G70 - Myasthenia gravis and other myoneural disorders          | 1.80      | 1.05    | 3.09    | 0.1%  | 48     | 20    | 36     | 70,184 | 4.50E-02  |
| G72 - Other & unspecified myopathies                           | 5.03      | 3.81    | 6.65    | 0.4%  | 26     | 59    | 297    | 69,906 | 3.46E-36  |
| G92 - Toxic encephalopathy                                     | 3.57      | 3.01    | 4.24    | 0.9%  | 30     | 167   | 597    | 69,494 | 2.51E-54  |
| G93 - Other disorders of brain                                 | 3.66      | 3.41    | 3.93    | 5.1%  | 600    | 960   | 3,515  | 65,213 | 6.29e-319 |
| H91 - Other and unspecified hearing loss                       | 1.23      | 1.05    | 1.45    | 0.5%  | 88     | 269   | 332    | 69,599 | 1.14E-02  |
| I09 - Other rheumatic heart diseases                           | 3.25      | 1.00    | 13.68   | 0.0%  | 2      | 4     | 13     | 70,269 | 4.90E-02  |
| I10 - Essential (primary) hypertension                         | 1.42      | 1.38    | 1.46    | 23.0% | 10,798 | 8,275 | 11,775 | 39,440 | 8.19E-135 |
| I11 - Hypertensive heart disease                               | 1.32      | 1.23    | 1.42    | 2.6%  | 688    | 1,345 | 1,773  | 66,482 | 2.06E-14  |
| I12 - Hypertensive chronic kidney disease                      | 1.98      | 1.85    | 2.12    | 3.5%  | 894    | 1,217 | 2,412  | 65,765 | 1.99E-87  |
| I13 - Hypertensive heart and chronic kidney disease            | 1.73      | 1.59    | 1.89    | 2.0%  | 601    | 784   | 1,360  | 67,543 | 2.08E-35  |
| I15 - Secondary hypertension                                   | 1.36      | 1.10    | 1.68    | 0.3%  | 71     | 149   | 203    | 69,865 | 4.73E-03  |
| I16 - Hypertensive crisis                                      | 1.33      | 1.13    | 1.57    | 0.5%  | 51     | 252   | 336    | 69,649 | 6.20E-04  |
| I21 - Acute myocardial infarction                              | 2.95      | 2.65    | 3.29    | 1.9%  | 186    | 437   | 1,291  | 68,374 | 1.43E-93  |
| I24 - Other acute ischemic heart diseases                      | 4.23      | 3.42    | 5.23    | 0.6%  | 31     | 105   | 444    | 69,708 | 3.58E-47  |
| I25 - Chronic ischemic heart disease                           | 1.52      | 1.45    | 1.60    | 6.1%  | 2,994  | 2,584 | 3,936  | 60,774 | 7.74E-63  |
| I26 - Pulmonary embolism                                       | 3.04      | 2.63    | 3.51    | 1.1%  | 159    | 245   | 745    | 69,139 | 1.21E-56  |
| I27 - Other pulmonary heart diseases                           | 1.25      | 1.11    | 1.41    | 0.9%  | 251    | 485   | 608    | 68,944 | 2.24E-04  |
| I30 - Acute pericarditis                                       | 2.80      | 1.38    | 5.68    | 0.0%  | 1      | 10    | 28     | 70,249 | 5.82E-03  |
| I31 - Other diseases of pericardium                            | 1.64      | 1.32    | 2.04    | 0.3%  | 35     | 130   | 213    | 69,910 | 9.53E-06  |
| I33 - Acute and subacute endocarditis                          | 1.80      | 1.16    | 2.80    | 0.1%  | 12     | 30    | 54     | 70,192 | 1.21E-02  |
| I38 - Endocarditis, valve unspecified                          | 1.44      | 1.03    | 2.01    | 0.1%  | 20     | 57    | 82     | 70,129 | 4.18E-02  |



| eTable 10 / Code                                                | OR (Est.) | OR (LI) | OR (UI) | Risk  | A     | B     | C      | D      | P-value   |
|-----------------------------------------------------------------|-----------|---------|---------|-------|-------|-------|--------|--------|-----------|
| I40 - Acute myocarditis                                         | 12.25     | 4.60    | 32.63   | 0.1%  | 0     | 4     | 49     | 70,235 | 1.50E-09  |
| I42 - Cardiomyopathy                                            | 1.31      | 1.17    | 1.47    | 1.0%  | 307   | 508   | 667    | 68,806 | 4.04E-06  |
| I44 - Atrioventricular/left bundle-branch block                 | 1.97      | 1.74    | 2.23    | 1.1%  | 108   | 380   | 750    | 69,050 | 4.93E-28  |
| I45 - Other conduction disorders                                | 3.01      | 2.65    | 3.42    | 1.4%  | 97    | 314   | 945    | 68,932 | 1.57E-70  |
| I46 - Cardiac arrest                                            | 21.24     | 15.30   | 29.50   | 1.1%  | 24    | 37    | 786    | 69,441 | 7.26E-150 |
| I47 - Paroxysmal tachycardia                                    | 2.12      | 1.86    | 2.41    | 1.0%  | 128   | 339   | 717    | 69,104 | 4.06E-31  |
| I48 - Atrial fibrillation & flutter                             | 2.38      | 2.24    | 2.53    | 5.5%  | 2,479 | 1,542 | 3,672  | 62,595 | 4.58E-191 |
| I49 - Other cardiac arrhythmias                                 | 2.00      | 1.83    | 2.19    | 2.1%  | 215   | 726   | 1,455  | 67,892 | 8.72E-55  |
| I50 - Heart failure                                             | 1.83      | 1.74    | 1.93    | 6.2%  | 3,719 | 2,178 | 3,983  | 60,408 | 6.86E-117 |
| I51 - Complications/ill-defined heart disease                   | 2.12      | 1.96    | 2.29    | 2.8%  | 253   | 922   | 1,954  | 67,159 | 2.29E-82  |
| I63 - Cerebral infarction                                       | 1.13      | 1.04    | 1.23    | 1.7%  | 788   | 1,055 | 1,190  | 67,255 | 4.68E-03  |
| I69 - Sequelae of cerebrovascular disease                       | 1.36      | 1.25    | 1.48    | 1.8%  | 1,381 | 914   | 1,245  | 66,748 | 1.23E-12  |
| I82 - Other venous embolism and thrombosis                      | 1.74      | 1.58    | 1.93    | 1.5%  | 377   | 586   | 1,022  | 68,303 | 2.04E-27  |
| I95 - Hypotension                                               | 3.35      | 3.10    | 3.62    | 3.9%  | 341   | 805   | 2,697  | 66,445 | 4.66E-224 |
| J02 - Acute pharyngitis                                         | 1.56      | 1.44    | 1.70    | 1.9%  | 87    | 858   | 1,342  | 68,001 | 7.22E-25  |
| J06 - Acute upper respiratory infections                        | 2.97      | 2.80    | 3.16    | 6.1%  | 222   | 1,408 | 4,187  | 64,471 | 6.56E-302 |
| J12 - Viral pneumonia, NEC                                      | 312.66    | 243.82  | 400.93  | 27.6% | 52    | 62    | 19,385 | 50,789 | 0.00E+00  |
| J13 - Pneumonia due to Streptococcus pneumoniae                 | 3.56      | 2.06    | 6.16    | 0.1%  | 1     | 16    | 57     | 70,214 | 2.85E-06  |
| J15 - Bacterial pneumonia, NEC                                  | 6.49      | 5.63    | 7.49    | 2.0%  | 57    | 215   | 1,396  | 68,620 | 5.64E-190 |
| J16 - Pneumonia due to other organisms                          | 11.32     | 7.71    | 16.62   | 0.5%  | 6     | 28    | 317    | 69,937 | 3.19E-54  |
| J17 - Pneumonia in diseases, CE                                 | 7.67      | 3.35    | 17.53   | 0.1%  | 5     | 6     | 46     | 70,231 | 6.36E-08  |
| J18 - Pneumonia, unspecified organism                           | 10.24     | 9.69    | 10.83   | 20.6% | 936   | 1,369 | 14,025 | 53,958 | 0.00E+00  |
| J20 - Acute bronchitis                                          | 2.09      | 1.90    | 2.29    | 2.0%  | 114   | 681   | 1,421  | 68,072 | 1.89E-58  |
| J21 - Acute bronchiolitis                                       | 2.10      | 1.55    | 2.83    | 0.2%  | 23    | 63    | 132    | 70,070 | 1.12E-06  |
| J22 - Unspecified acute lower resp. infection                   | 53.66     | 41.41   | 69.52   | 4.4%  | 4     | 58    | 3,112  | 67,114 | 0.00E+00  |
| J39 - Other diseases of upper respiratory tract                 | 2.30      | 1.67    | 3.17    | 0.2%  | 11    | 53    | 122    | 70,102 | 2.74E-07  |
| J40 - Bronchitis, not specified acute/chronic                   | 2.72      | 2.41    | 3.06    | 1.4%  | 38    | 369   | 1,002  | 68,879 | 2.54E-65  |
| J43 - Emphysema                                                 | 1.96      | 1.75    | 2.21    | 1.2%  | 229   | 422   | 829    | 68,808 | 1.69E-30  |
| J44 - Other chronic obstructive pulm. disease                   | 2.15      | 2.03    | 2.28    | 5.4%  | 3,536 | 1,629 | 3,499  | 61,624 | 3.68E-150 |
| J45 - Asthma                                                    | 2.33      | 2.19    | 2.49    | 4.4%  | 1,324 | 1,282 | 2,991  | 64,691 | 1.71E-150 |
| J47 - Bronchiectasis                                            | 1.62      | 1.24    | 2.12    | 0.2%  | 32    | 87    | 141    | 70,028 | 4.48E-04  |
| J68 - Respiratory conditions due to inhalation of chemicals ... | 3.00      | 1.04    | 10.55   | 0.0%  | 1     | 5     | 15     | 70,267 | 4.14E-02  |
| J69 - Pneumonitis due to solids & liquids                       | 2.33      | 2.00    | 2.71    | 0.8%  | 102   | 243   | 566    | 69,377 | 1.03E-29  |
| J80 - Acute respiratory distress syndrome                       | 74.24     | 54.62   | 100.92  | 4.3%  | 13    | 41    | 3,044  | 67,190 | 0.00E+00  |
| J81 - Pulmonary edema                                           | 2.26      | 2.00    | 2.54    | 1.3%  | 94    | 391   | 883    | 68,920 | 4.68E-43  |
| J82 - Pulmonary eosinophilia, NEC                               | 5.50      | 1.98    | 15.26   | 0.0%  | 5     | 4     | 22     | 70,257 | 8.56E-04  |
| J84 - Other interstitial pulmonary diseases                     | 2.52      | 2.16    | 2.93    | 0.8%  | 135   | 227   | 571    | 69,355 | 6.32E-34  |
| J85 - Abscess of lung and mediastinum                           | 2.42      | 1.25    | 4.68    | 0.0%  | 3     | 12    | 29     | 70,244 | 1.25E-02  |
| J90 - Pleural effusion, NEC                                     | 2.91      | 2.67    | 3.17    | 3.0%  | 311   | 703   | 2,046  | 67,228 | 1.71E-144 |
| J91 - Pleural effusion in conditions, CE                        | 2.26      | 1.73    | 2.96    | 0.2%  | 31    | 76    | 172    | 70,009 | 1.61E-09  |
| J92 - Pleural plaque                                            | 2.00      | 1.33    | 3.01    | 0.1%  | 0     | 34    | 68     | 70,186 | 1.09E-03  |
| J93 - Pneumothorax & air leak                                   | 5.10      | 3.88    | 6.70    | 0.4%  | 9     | 61    | 311    | 69,907 | 3.95E-38  |
| J95 - Procedural complications of resp. system                  | 3.49      | 2.66    | 4.56    | 0.3%  | 17    | 68    | 237    | 69,966 | 6.61E-22  |
| J96 - Respiratory failure, NEC                                  | 19.70     | 18.34   | 21.15   | 22.9% | 1,454 | 792   | 15,600 | 52,442 | 0.00E+00  |
| J98 - Other respiratory disorders                               | 6.94      | 6.50    | 7.39    | 10.8% | 361   | 1,069 | 7,414  | 61,444 | 0.00E+00  |
| J99 - Respiratory disorders in diseases, CE                     | 4.71      | 2.13    | 10.43   | 0.0%  | 2     | 7     | 33     | 70,246 | 7.72E-05  |
| K21 - Gastro-esophageal reflux disease                          | 1.17      | 1.12    | 1.23    | 5.9%  | 2,106 | 3,255 | 3,807  | 61,120 | 5.50E-11  |
| K35 - Acute appendicitis                                        | 2.64      | 1.33    | 5.21    | 0.0%  | 2     | 11    | 29     | 70,246 | 7.19E-03  |
| K56 - Paralytic ileus and intestinal obstruction without hernia | 1.33      | 1.14    | 1.55    | 0.5%  | 81    | 288   | 382    | 69,537 | 3.27E-04  |
| K59 - Other functional intestinal disorders                     | 1.08      | 1.01    | 1.15    | 2.8%  | 762   | 1,777 | 1,917  | 65,832 | 2.22E-02  |
| K72 - Hepatic failure, NEC                                      | 2.54      | 2.01    | 3.20    | 0.4%  | 58    | 99    | 251    | 69,880 | 6.96E-16  |

| eTable 10 / Code                                               | OR (Est.) | OR (LI) | OR (UI) | Risk  | A     | B     | C      | D      | P-value   |
|----------------------------------------------------------------|-----------|---------|---------|-------|-------|-------|--------|--------|-----------|
| K75 - Other inflammatory liver diseases                        | 1.48      | 1.12    | 1.95    | 0.2%  | 44    | 82    | 121    | 70,041 | 7.65E-03  |
| K82 - Other diseases of gallbladder                            | 1.46      | 1.17    | 1.83    | 0.3%  | 14    | 128   | 187    | 69,959 | 1.08E-03  |
| K85 - Acute pancreatitis                                       | 1.63      | 1.24    | 2.16    | 0.2%  | 20    | 79    | 129    | 70,060 | 6.80E-04  |
| K92 - Other diseases of digestive system                       | 1.68      | 1.52    | 1.86    | 1.4%  | 193   | 573   | 963    | 68,559 | 3.22E-23  |
| L89 - Pressure ulcer                                           | 1.93      | 1.76    | 2.10    | 2.1%  | 743   | 754   | 1,453  | 67,338 | 6.19E-50  |
| M06 - Other rheumatoid arthritis                               | 1.27      | 1.10    | 1.46    | 0.6%  | 292   | 329   | 417    | 69,250 | 1.45E-03  |
| M10 - Gout                                                     | 1.21      | 1.08    | 1.35    | 1.0%  | 351   | 591   | 714    | 68,632 | 7.32E-04  |
| M32 - Systemic lupus erythematosus (SLE)                       | 1.53      | 1.18    | 1.98    | 0.2%  | 112   | 95    | 145    | 69,936 | 1.56E-03  |
| M62 - Other disorders of muscle                                | 1.10      | 1.05    | 1.15    | 6.6%  | 3,397 | 3,800 | 4,182  | 58,909 | 2.00E-05  |
| N07 - Hereditary nephropathy, NEC                              | Inf       |         |         | 0.0%  | 0     | 0     | 10     | 70,278 | 1.95E-03  |
| N17 - Acute kidney failure                                     | 6.56      | 6.18    | 6.95    | 12.2% | 1,079 | 1,268 | 8,312  | 59,629 | 0.00E+00  |
| N18 - Chronic kidney disease (CKD)                             | 1.97      | 1.87    | 2.07    | 6.9%  | 5,104 | 2,191 | 4,317  | 58,676 | 6.48E-153 |
| N19 - Unspecified kidney failure                               | 2.09      | 1.75    | 2.50    | 0.5%  | 36    | 179   | 375    | 69,698 | 1.18E-16  |
| N28 - Other disorders of kidney and ureter, NEC                | 1.13      | 1.03    | 1.24    | 1.3%  | 97    | 792   | 894    | 68,505 | 1.39E-02  |
| N30 - Cystitis                                                 | 1.33      | 1.18    | 1.49    | 0.9%  | 93    | 490   | 651    | 69,054 | 2.17E-06  |
| N39 - Other disorders of urinary system                        | 1.26      | 1.20    | 1.32    | 5.0%  | 1,377 | 2,646 | 3,331  | 62,934 | 8.96E-19  |
| N40 - Benign prostatic hyperplasia                             | 1.19      | 1.11    | 1.28    | 2.3%  | 933   | 1,330 | 1,587  | 66,438 | 2.14E-06  |
| O07 - Failed attempted termination of pregnancy                | 8.00      | 1.88    | 71.72   | 0.0%  | 0     | 2     | 16     | 70,270 | 1.31E-03  |
| O13 - Gestational [pregnancy-induced] hypertension without ... | 4.80      | 1.89    | 12.16   | 0.0%  | 0     | 5     | 24     | 70,259 | 8.30E-04  |
| O14 - Pre-eclampsia                                            | 4.43      | 1.99    | 9.84    | 0.0%  | 0     | 7     | 31     | 70,250 | 1.91E-04  |
| O34 - Maternal care for abnormality of pelvic organs           | 1.71      | 1.12    | 2.60    | 0.1%  | 33    | 34    | 58     | 70,163 | 1.65E-02  |
| O41 - Other disorders of amniotic fluid and membranes          | 5.83      | 2.52    | 13.53   | 0.0%  | 1     | 6     | 35     | 70,246 | 1.23E-05  |
| O42 - Premature rupture of membranes                           | 3.83      | 1.60    | 9.16    | 0.0%  | 0     | 6     | 23     | 70,259 | 2.97E-03  |
| O43 - Placental disorders                                      | 5.80      | 2.32    | 14.51   | 0.0%  | 3     | 5     | 29     | 70,251 | 8.00E-05  |
| O48 - Late pregnancy                                           | 6.33      | 2.74    | 14.62   | 0.1%  | 0     | 6     | 38     | 70,244 | 2.96E-06  |
| O61 - Failed induction of labor                                | Inf       |         |         | 0.0%  | 0     | 0     | 6      | 70,282 | 3.13E-02  |
| O62 - Abnormalities of forces of labor                         | 5.00      | 2.27    | 11.03   | 0.0%  | 0     | 7     | 35     | 70,246 | 3.10E-05  |
| O66 - Other obstructed labor                                   | 6.00      | 1.34    | 55.20   | 0.0%  | 0     | 2     | 12     | 70,274 | 1.29E-02  |
| O69 - Labor and delivery complicated by umbilical ...          | 4.86      | 2.20    | 10.73   | 0.0%  | 1     | 7     | 34     | 70,246 | 4.90E-05  |
| O70 - Perineal laceration during delivery                      | 5.78      | 2.89    | 11.56   | 0.1%  | 0     | 9     | 52     | 70,227 | 7.55E-08  |
| O72 - Postpartum hemorrhage                                    | 4.67      | 1.30    | 25.33   | 0.0%  | 0     | 3     | 14     | 70,271 | 1.27E-02  |
| O75 - Other complications of labor and delivery, NEC           | 18.00     | 2.84    | 749.96  | 0.0%  | 0     | 1     | 18     | 70,269 | 7.63E-05  |
| O76 - Abnormality in fetal heart rate and rhythm ...           | 8.00      | 3.72    | 17.22   | 0.1%  | 2     | 7     | 56     | 70,223 | 1.47E-09  |
| O77 - Other fetal stress complicating labor and delivery       | 12.50     | 3.28    | 47.65   | 0.0%  | 0     | 2     | 25     | 70,261 | 2.30E-05  |
| O80 - Encounter for full-term uncomplicated delivery           | 4.60      | 2.65    | 7.98    | 0.1%  | 0     | 15    | 69     | 70,204 | 7.35E-09  |
| O82 - Encounter for cesarean delivery without indication       | 7.50      | 2.76    | 20.41   | 0.0%  | 0     | 4     | 30     | 70,254 | 1.81E-05  |
| O86 - Other puerperal infections                               | 11.50     | 3.01    | 44.00   | 0.0%  | 0     | 2     | 23     | 70,263 | 6.33E-05  |
| O90 - Complications of the puerperium, NEC                     | 13.50     | 3.55    | 51.30   | 0.0%  | 2     | 2     | 27     | 70,257 | 8.32E-06  |
| O98 - Maternal infectious diseases                             | 29.45     | 16.29   | 53.25   | 0.5%  | 9     | 11    | 324    | 69,944 | 3.72E-65  |
| O99 - Other maternal diseases classifiable elsewhere but ...   | 1.77      | 1.41    | 2.23    | 0.3%  | 134   | 113   | 200    | 69,841 | 1.17E-06  |
| Q90 - Down syndrome                                            | 4.64      | 2.44    | 8.80    | 0.1%  | 47    | 11    | 51     | 70,179 | 7.31E-07  |
| R00 - Abnormalities of heart beat                              | 2.65      | 2.49    | 2.82    | 5.6%  | 409   | 1,438 | 3,810  | 64,631 | 6.01E-235 |
| R03 - Abnormal blood-pressure reading, without diagnosis       | 1.17      | 1.02    | 1.34    | 0.6%  | 37    | 388   | 453    | 69,410 | 2.73E-02  |
| R04 - Hemorrhage from respiratory passages                     | 1.82      | 1.56    | 2.12    | 0.7%  | 24    | 256   | 465    | 69,543 | 9.46E-15  |
| R05 - Cough                                                    | 6.09      | 5.84    | 6.36    | 22.4% | 1,268 | 2,450 | 14,920 | 51,650 | 0.00E+00  |
| R06 - Abnormalities of breathing                               | 7.03      | 6.74    | 7.33    | 26.9% | 2,200 | 2,506 | 17,609 | 47,973 | 0.00E+00  |
| R07 - Pain in throat & chest                                   | 2.06      | 1.96    | 2.16    | 7.3%  | 650   | 2,387 | 4,909  | 62,342 | 1.89E-191 |
| R09 - Other s/s circulatory/respiratory system                 | 6.48      | 6.14    | 6.85    | 14.3% | 635   | 1,501 | 9,732  | 58,420 | 0.00E+00  |
| R11 - Nausea & vomiting                                        | 1.92      | 1.81    | 2.05    | 4.2%  | 283   | 1,479 | 2,846  | 65,680 | 7.92E-96  |
| R13 - Aphagia and dysphagia                                    | 1.52      | 1.43    | 1.61    | 3.8%  | 1,554 | 1,693 | 2,569  | 64,472 | 5.81E-41  |
| R14 - Flatulence and related conditions                        | 1.28      | 1.11    | 1.48    | 0.6%  | 32    | 325   | 417    | 69,514 | 8.36E-04  |

| eTable 10 / Code                                                    | OR (Est.) | OR (LI) | OR (UI) | Risk  | A     | B     | C      | D      | P-value   |
|---------------------------------------------------------------------|-----------|---------|---------|-------|-------|-------|--------|--------|-----------|
| R19 - Other s/s digestive system & abdomen                          | 2.56      | 2.40    | 2.74    | 4.5%  | 232   | 1,212 | 3,106  | 65,738 | 1.72E-182 |
| R34 - Anuria & oliguria                                             | 6.43      | 4.33    | 9.55    | 0.3%  | 2     | 28    | 180    | 70,078 | 1.19E-25  |
| R40 - Somnolence, stupor & coma                                     | 2.92      | 2.63    | 3.24    | 2.0%  | 103   | 470   | 1,373  | 68,342 | 5.22E-98  |
| R41 - Other s/s involving cognitive functions                       | 2.45      | 2.33    | 2.57    | 7.9%  | 1,413 | 2,165 | 5,303  | 61,407 | 1.59E-288 |
| R43 - Disturbances of smell & taste                                 | 32.62     | 18.91   | 56.25   | 0.6%  | 2     | 13    | 424    | 69,849 | 1.20E-85  |
| R45 - Symptoms and signs involving emotional state                  | 1.43      | 1.28    | 1.61    | 1.0%  | 194   | 500   | 716    | 68,878 | 7.02E-10  |
| R47 - Speech disturbances, NEC                                      | 1.15      | 1.01    | 1.31    | 0.7%  | 243   | 423   | 488    | 69,134 | 3.40E-02  |
| R50 - Fever of other & unknown origin                               | 12.23     | 11.55   | 12.96   | 22.3% | 608   | 1,250 | 15,290 | 53,140 | 0.00E+00  |
| R51 - Headache                                                      | 1.81      | 1.68    | 1.95    | 2.7%  | 133   | 1,021 | 1,846  | 67,288 | 1.94E-53  |
| R52 - Pain, unspecified                                             | 1.55      | 1.41    | 1.70    | 1.6%  | 225   | 731   | 1,134  | 68,198 | 1.29E-20  |
| R53 - Malaise & fatigue                                             | 2.48      | 2.38    | 2.58    | 13.3% | 1,946 | 3,487 | 8,635  | 56,220 | 0.00E+00  |
| R54 - Age-related physical debility                                 | 1.47      | 1.26    | 1.71    | 0.6%  | 133   | 275   | 404    | 69,476 | 9.01E-07  |
| R55 - Syncope and collapse                                          | 1.54      | 1.40    | 1.69    | 1.6%  | 190   | 734   | 1,129  | 68,235 | 6.96E-20  |
| R57 - Shock, NEC                                                    | 9.31      | 7.60    | 11.40   | 1.4%  | 17    | 103   | 959    | 69,209 | 1.02E-151 |
| R61 - Generalized hyperhidrosis                                     | 1.64      | 1.18    | 2.29    | 0.1%  | 3     | 56    | 92     | 70,137 | 4.01E-03  |
| R62 - Lack of expected normal development                           | 2.79      | 2.45    | 3.18    | 1.2%  | 254   | 305   | 850    | 68,879 | 1.14E-57  |
| R63 - Symptoms and signs concerning food and fluid intake           | 1.78      | 1.64    | 1.92    | 2.6%  | 375   | 991   | 1,761  | 67,161 | 1.18E-48  |
| R64 - Cachexia                                                      | 2.44      | 1.84    | 3.23    | 0.2%  | 31    | 68    | 166    | 70,023 | 2.28E-10  |
| R65 - S/s of systemic inflammation/infection                        | 9.39      | 8.43    | 10.45   | 4.9%  | 131   | 367   | 3,445  | 66,345 | 0.00E+00  |
| R68 - Other general s/s                                             | 3.80      | 3.56    | 4.07    | 6.1%  | 501   | 1,093 | 4,157  | 64,537 | 0.00E+00  |
| R74 - Abnormal serum enzyme levels                                  | 3.63      | 3.28    | 4.03    | 2.4%  | 85    | 458   | 1,664  | 68,081 | 7.87E-151 |
| R77 - Other abnormalities of plasma proteins                        | 1.47      | 1.12    | 1.93    | 0.2%  | 11    | 87    | 128    | 70,062 | 6.37E-03  |
| R78 - Findings of drugs & other substances                          | 2.53      | 2.23    | 2.87    | 1.2%  | 96    | 342   | 866    | 68,984 | 3.58E-51  |
| R79 - Other abnormal findings of blood                              | 2.49      | 2.33    | 2.67    | 4.3%  | 245   | 1,187 | 2,959  | 65,897 | 1.55E-166 |
| R91 - Abnormal findings on imaging of lung                          | 7.29      | 6.87    | 7.74    | 13.1% | 616   | 1,227 | 8,945  | 59,500 | 0.00E+00  |
| R93 - Abnormal findings on diagnostic imaging of ...                | 1.22      | 1.09    | 1.37    | 0.9%  | 30    | 512   | 625    | 69,121 | 8.95E-04  |
| R94 - Abnormal results of function studies                          | 2.26      | 2.12    | 2.41    | 4.7%  | 250   | 1,420 | 3,209  | 65,409 | 3.25E-152 |
| T17 - Foreign body in respiratory tract                             | 1.59      | 1.16    | 2.19    | 0.1%  | 8     | 61    | 97     | 70,122 | 5.36E-03  |
| T36 - Poisoning by ... systemic antibiotics ...                     | 1.63      | 1.05    | 2.52    | 0.1%  | 1     | 32    | 52     | 70,203 | 3.82E-02  |
| T37 - Poisoning by ... other anti-infectives ...                    | 5.00      | 2.14    | 11.71   | 0.0%  | 0     | 6     | 30     | 70,252 | 1.26E-04  |
| T38 - Adverse effects hormones, NEC                                 | 3.30      | 2.54    | 4.27    | 0.3%  | 9     | 74    | 244    | 69,961 | 2.62E-21  |
| T40 - Poisoning by ... narcotics ...                                | 1.90      | 1.39    | 2.59    | 0.2%  | 1     | 60    | 114    | 70,113 | 5.87E-05  |
| T50 - Poisoning by ... diuretics ...                                | 1.38      | 1.10    | 1.72    | 0.3%  | 13    | 133   | 183    | 69,959 | 5.84E-03  |
| T68 - Hypothermia                                                   | 2.35      | 1.45    | 3.81    | 0.1%  | 5     | 23    | 54     | 70,206 | 6.29E-04  |
| T73 - Effects of other deprivation                                  | 3.20      | 1.12    | 11.17   | 0.0%  | 1     | 5     | 16     | 70,266 | 2.66E-02  |
| T79 - Certain early complications of trauma, NEC                    | 3.00      | 1.96    | 4.59    | 0.1%  | 10    | 28    | 84     | 70,166 | 2.03E-07  |
| T85 - Complications of other internal prosthetic devices ...        | 1.32      | 1.01    | 1.73    | 0.2%  | 9     | 93    | 123    | 70,063 | 4.85E-02  |
| T86 - Complications of transplanted organs and tissue               | 1.40      | 1.05    | 1.87    | 0.2%  | 57    | 78    | 109    | 70,044 | 2.82E-02  |
| Y71 - Cardiovascular devices associated with adverse incidents      | 3.91      | 2.04    | 7.49    | 0.1%  | 1     | 11    | 43     | 70,233 | 2.46E-05  |
| Y82 - Other and unspecified medical devices ...                     | 9.00      | 1.25    | 394.48  | 0.0%  | 0     | 1     | 9      | 70,278 | 2.15E-02  |
| Y84 - Other medical procedures as the cause of abnormal ...         | 3.00      | 1.93    | 4.66    | 0.1%  | 2     | 26    | 78     | 70,182 | 5.70E-07  |
| Y95 - Nosocomial condition                                          | 2.44      | 1.54    | 3.87    | 0.1%  | 2     | 25    | 61     | 70,200 | 1.61E-04  |
| Z09 - Encounter for follow-up examination after ...                 | 2.16      | 1.91    | 2.45    | 1.1%  | 25    | 362   | 782    | 69,119 | 3.04E-35  |
| Z11 - Encounter for screening for infectious and parasitic diseases | 1.28      | 1.17    | 1.41    | 1.5%  | 53    | 805   | 1,033  | 68,397 | 1.19E-07  |
| Z16 - Resistance to antimicrobial drugs                             | 1.45      | 1.18    | 1.77    | 0.3%  | 61    | 157   | 227    | 69,843 | 4.30E-04  |
| Z20 - Exposure to communicable diseases                             | 34.98     | 31.44   | 38.92   | 17.3% | 114   | 346   | 12,103 | 57,725 | 0.00E+00  |
| Z21 - Asymptomatic human immunodeficiency ...                       | 2.43      | 1.77    | 3.33    | 0.2%  | 41    | 54    | 131    | 70,062 | 2.30E-08  |
| Z29 - Other prophylactic measures                                   | 2.90      | 2.28    | 3.69    | 0.4%  | 26    | 89    | 258    | 69,915 | 1.90E-19  |
| Z37 - Outcome of delivery                                           | 9.20      | 6.11    | 13.86   | 0.3%  | 2     | 25    | 230    | 70,031 | 2.26E-37  |
| Z39 - Encounter for maternal postpartum care and examination        | 2.08      | 1.42    | 3.04    | 0.1%  | 7     | 39    | 81     | 70,161 | 1.82E-04  |
| Z3A - Weeks of gestation                                            | 1.87      | 1.51    | 2.32    | 0.3%  | 307   | 125   | 234    | 69,622 | 1.20E-08  |

| eTable 10 / Code                                             | OR (Est.) | OR (LI) | OR (UI) | Risk  | A     | B     | C     | D      | P-value   |
|--------------------------------------------------------------|-----------|---------|---------|-------|-------|-------|-------|--------|-----------|
| Z43 - Encounter for attention to artificial openings         | 1.21      | 1.03    | 1.42    | 0.5%  | 153   | 270   | 327   | 69,538 | 2.19E-02  |
| Z45 - Management of implanted device                         | 3.53      | 3.22    | 3.88    | 2.9%  | 135   | 562   | 1,986 | 67,605 | 7.61E-175 |
| Z46 - Fitting/adjustment of other devices                    | 6.30      | 5.68    | 6.99    | 3.7%  | 101   | 415   | 2,616 | 67,156 | 0.00E+00  |
| Z51 - Encounter for other medical care                       | 2.67      | 2.48    | 2.87    | 3.8%  | 398   | 985   | 2,627 | 66,278 | 3.75E-164 |
| Z60 - Problems of social environment                         | 3.09      | 2.29    | 4.17    | 0.2%  | 11    | 56    | 173   | 70,048 | 1.78E-14  |
| Z65 - Problems related to other psychosocial circumstances   | 1.95      | 1.31    | 2.89    | 0.1%  | 7     | 37    | 72    | 70,172 | 1.13E-03  |
| Z66 - Do not resuscitate                                     | 11.55     | 9.89    | 13.50   | 2.8%  | 93    | 172   | 1,987 | 68,036 | 0.00E+00  |
| Z71 - Persons encountering health services for ...           | 1.76      | 1.64    | 1.90    | 2.9%  | 225   | 1,141 | 2,011 | 66,911 | 4.85E-54  |
| Z74 - Problems of provider dependency                        | 2.47      | 2.34    | 2.60    | 7.3%  | 1,500 | 1,990 | 4,908 | 61,890 | 3.15E-270 |
| Z78 - Other specified health status                          | 2.22      | 1.99    | 2.48    | 1.5%  | 96    | 460   | 1,021 | 68,711 | 5.71E-48  |
| Z79 - Long term (current) drug therapy                       | 1.39      | 1.34    | 1.45    | 10.1% | 2,928 | 4,540 | 6,331 | 56,489 | 4.61E-66  |
| Z82 - Family history of certain disabilities and chronic ... | 1.38      | 1.20    | 1.59    | 0.6%  | 32    | 327   | 451   | 69,478 | 1.03E-05  |
| Z85 - Personal history of malignant neoplasm                 | 1.44      | 1.32    | 1.58    | 1.7%  | 373   | 823   | 1,186 | 67,906 | 6.67E-16  |
| Z86 - Personal history of certain other diseases             | 1.65      | 1.56    | 1.75    | 4.2%  | 839   | 1,736 | 2,866 | 64,847 | 3.43E-62  |
| Z87 - Personal history of other conditions                   | 1.62      | 1.53    | 1.71    | 4.9%  | 868   | 2,045 | 3,311 | 64,064 | 6.10E-67  |
| Z88 - Allergy status to drugs, medicaments ...               | 1.85      | 1.68    | 2.04    | 1.7%  | 188   | 625   | 1,155 | 68,320 | 4.60E-36  |
| Z90 - Acquired absence of organs, NEC                        | 1.56      | 1.41    | 1.73    | 1.3%  | 177   | 585   | 914   | 68,612 | 2.42E-17  |
| Z91 - Personal risk factors, NEC                             | 1.12      | 1.05    | 1.19    | 3.1%  | 858   | 1,894 | 2,118 | 65,418 | 4.30E-04  |
| Z92 - Personal history of medical treatment                  | 1.55      | 1.30    | 1.86    | 0.4%  | 38    | 193   | 300   | 69,757 | 1.81E-06  |
| Z93 - Artificial opening status                              | 1.33      | 1.15    | 1.53    | 0.6%  | 344   | 333   | 443   | 69,168 | 9.12E-05  |
| Z94 - Transplanted organ and tissue status                   | 1.77      | 1.43    | 2.19    | 0.3%  | 301   | 135   | 239   | 69,613 | 1.00E-07  |
| Z95 - Presence of cardiac and vascular implants and grafts   | 1.50      | 1.39    | 1.61    | 2.5%  | 910   | 1,135 | 1,700 | 66,543 | 3.23E-26  |
| Z97 - Presence of other devices                              | 2.60      | 2.04    | 3.33    | 0.3%  | 12    | 88    | 229   | 69,959 | 3.74E-15  |
| Z99 - Dependence on devices, NEC                             | 4.38      | 4.11    | 4.67    | 7.7%  | 1,798 | 1,187 | 5,201 | 62,102 | 0.00E+00  |
